# Supplementary material for: Ago2 Immunoprecipitation Identifies Predicted MicroRNAs in Human Embryonic Stem Cells and Neural Precursors
Source: PLoS One. 2009 Sep 28;4(9):e7192. doi: 10.1371/journal.pone.0007192 (PMC2745660; doi:10.1371/journal.pone.0007192)
Supplement: File S1 — Excel file containing TaqMan microRNA Array results for RG7 hESC stages. A single sample of RG7 ESC, NSC, or NPC culture RNA (the same samples used for the Illumina Beadchip microarray assay) were assessed by qPCR for known microRNAs using the Applied Biosystems TaqMan Human microRNA array cards (A and B, part numbers 4398965 and 4398966), following the manufacturer's recommended protocol. For each probe, the “−dCt” or negative delta Ct (cycle threshold) is shown, subtracting the Ct value for U6 snRNA endogenous control (not shown). To calculate quantities relative to ESC, the negative delta-delta Ct (−ddCt) was calculated by subtracting the dCt for ESC, and then the relative quantity (RQ, labeled here as 2̂−ddCt) was calculated by making this value the exponent of power 2. (0.27 MB XLS) [file pone.0007192.s010.xls]

## Sheet: Sheet1
		-dCt	-dCt	-dCt	-ddCt	-ddCt	2^-ddCt	2^-ddCt
ID	Detector tlda	RG7.ESC	RG7.NSC	RG7.NP	RG7.NSC	RG7.NP	RG7.NSC	RG7.NP
A-5	has-miR-155-4395459
A-6	hsa-let-7a-4373169	-16.156	-12.252	-11.223	3.904	4.933	14.97	30.5479
A-7	hsa-let-7b-4395446	-13.109	-10.238	-9.228	2.871	3.881	7.31572	14.7332
A-8	hsa-let-7c-4373167		-10.223	-9.204
A-9	hsa-let-7d-4395394		-13.224	-13.231
A-10	hsa-let-7e-4395517	-14.115	-8.204	-8.205	5.911	5.91	60.1711	60.1295
A-11	hsa-let-7f-4373164		-13.211	-12.201
A-12	hsa-let-7g-4395393	-16.143	-11.233	-9.2	4.91	6.943	30.0647	123.041
A-13	hsa-miR-1-4395333	-16.135	-16.236	-18.186	-0.101	-2.051	0.932386	0.241317
A-14	hsa-miR-100-4373160	-15.103	-7.207	-7.201	7.896	7.902	238.195	239.188
A-15	hsa-miR-101-4395364	-15.108	-16.236	-14.195	-1.128	0.913	0.45755	1.88296
A-16	hsa-miR-103-4373158	-11.127	-9.209	-9.215	1.918	1.912	3.77899	3.7633
A-17	hsa-miR-105-4395278	-14.163	-16.416	-15.224	-2.253	-1.061	0.209787	0.4793
A-18	hsa-miR-106a-4395280	-3.1	-3.208	-4.218	-0.108	-1.118	0.927873	0.460732
A-19	hsa-miR-106b-4373155	-9.108	-8.212	-9.215	0.896	-0.107	1.8609	0.928517
A-20	hsa-miR-107-4373154	-16.155	-12.239	-13.219	3.916	2.936	15.095	7.65287
A-21	hsa-miR-10a-4373153		-13.23	-15.228
A-22	hsa-miR-10b-4395329			-17.15
A-23	hsa-miR-122-4395356
A-24	hsa-miR-124-4373295	-15.14	-13.235	-11.216	1.905	3.924	3.74509	15.1789
A-25	hsa-miR-125a-3p-4395310		-14.218	-15.215
A-26	hsa-miR-125a-5p-4395309	-11.128	-6.231	-7.222	4.897	3.906	29.795	14.9907
A-27	hsa-miR-125b-4373148	-15.108	-7.251	-6.21	7.857	8.898	231.842	477.051
A-28	hsa-miR-126-4395339	-10.144	-9.225	-10.204	0.919	-0.06	1.8908	0.959264
A-29	hsa-miR-127-3p-4373147	-10.123	-9.232	-9.231	0.891	0.892	1.85446	1.85575
A-30	hsa-miR-127-5p-4395340			-17.198
A-31	hsa-miR-128-4395327	-14.131	-12.222	-12.212	1.909	1.919	3.75549	3.78161
A-32	hsa-miR-129-3p-4373297	-15.169	-15.267	-13.242	-0.098	1.927	0.934327	3.80264
A-33	hsa-miR-129-5p-4373171			-15.228
A-34	hsa-miR-130a-4373145	-11.133	-9.214	-9.218	1.919	1.915	3.78161	3.77114
A-35	hsa-miR-130b-4373144	-12.128	-9.224	-10.216	2.904	1.912	7.48499	3.7633
A-36	hsa-miR-132-4373143	-16.107	-8.23	-8.216	7.877	7.891	235.079	237.371
A-37	hsa-miR-133a-4395357	-12.111	-12.255	-15.231	-0.144	-3.12	0.905006	0.115023
A-38	hsa-miR-133b-4395358	-16.134	-10.296	-16.225	5.838	-0.091	57.2023	0.938872
A-39	hsa-miR-134-4373299	-11.122	-9.215	-10.214	1.907	0.908	3.75028	1.87644
A-40	hsa-miR-135a-4373140	-11.097	-8.239	-6.22	2.858	4.877	7.2501	29.3848
A-41	hsa-miR-135b-4395372	-10.14	-7.228	-6.195	2.912	3.945	7.52661	15.4015
A-42	hsa-miR-136-4373173		-17.301	-18.213
A-43	hsa-miR-137-4373301		-14.23	-12.219
A-44	hsa-miR-138-4395395	-10.102	-11.223	-8.186	-1.121	1.916	0.459775	3.77375
A-45	hsa-miR-139-3p-4395424		-16.226	-15.248
A-46	hsa-miR-139-5p-4395400	-15.137	-13.231	-10.2	1.906	4.937	3.74769	30.6327
A-47	hsa-miR-140-3p-4395345	-13.124	-11.227	-11.223	1.897	1.901	3.72438	3.73472
A-48	hsa-miR-140-5p-4373374	-10.083	-8.222	-8.216	1.861	1.867	3.63259	3.64773
A-49	hsa-miR-141-4373137	-13.092		-18.287		-5.195		0.0272992
A-50	hsa-miR-142-3p-4373136		-15.205	-18.194
A-51	hsa-miR-142-5p-4395359	-17.225		-18.356		-1.131		0.456599
A-52	hsa-miR-143-4395360		-10.213	-13.22
A-53	hsa-miR-145-4395389	-13.098	-7.272	-10.208	5.826	2.89	56.7284	7.4127
A-54	hsa-miR-146a-4373132	-13.116	-12.221	-16.212	0.895	-3.096	1.85961	0.116953
A-55	hsa-miR-146b-3p-4395472
A-56	hsa-miR-146b-5p-4373178	-16.114	-12.24	-11.207	3.874	4.907	14.6619	30.0023
A-57	hsa-miR-147-4373131			10.946
A-58	hsa-miR-147b-4395373
A-59	hsa-miR-148a-4373130	-11.112	-13.194	-13.172	-2.082	-2.06	0.236187	0.239816
A-60	hsa-miR-148b-4373129	-16.147	-13.226	-13.217	2.921	2.93	7.57371	7.6211
A-61	hsa-miR-149-4395366	-11.127	-6.233	-5.212	4.894	5.915	29.7331	60.3382
A-62	hsa-miR-150-4373127	-13.126	-17.322		-4.196		0.0545605
A-63	hsa-miR-152-4395170	-16.103	-11.204	-12.203	4.899	3.9	29.8364	14.9285
A-64	hsa-miR-153-4373305		-16.209	-15.198
A-65	hsa-miR-154-4373270		-16.253
A-66	hsa-miR-15a-4373123	-13.141	-11.215	-11.22	1.926	1.921	3.8	3.78685
A-67	hsa-miR-15b-4373122	-10.131	-8.233	-9.2	1.898	0.931	3.72696	1.9066
A-68	hsa-miR-16-4373121	-7.13	-5.233	-5.199	1.897	1.931	3.72438	3.81319
A-69	hsa-miR-17-4395419	-3.106	-3.21	-4.205	-0.104	-1.099	0.93045	0.46684
A-70	hsa-miR-181a-4373117	-11.038	-9.244	-9.214	1.794	1.824	3.46775	3.54062
A-71	hsa-miR-181c-4373115		-14.246	-14.16
A-72	hsa-miR-182-4395445	-12.107	-17.308	-17.201	-5.201	-5.094	0.0271859	0.0292788
A-73	hsa-miR-183-4395380	-12.176		-17.191		-5.015		0.0309268
A-74	hsa-miR-184-4373113		-10.19	-13.19
A-75	hsa-miR-185-4395382	-14.111	-13.233	-13.207	0.878	0.904	1.83783	1.87125
A-76	hsa-miR-186-4395396	-8.097	-7.191	-7.181	0.906	0.916	1.87384	1.88688
A-77	hsa-miR-187-4373307	-11.129	-16.313		-5.184		0.0275081
A-78	hsa-miR-188-3p-4395217
A-79	hsa-miR-18a-4395533	-9.108	-9.221	-11.203	-0.113	-2.095	0.924663	0.234068
A-80	hsa-miR-18b-4395328	-9.145	-10.239	-12.199	-1.094	-3.054	0.468461	0.120408
A-81	hsa-miR-190-4373110	-18.151	-16.214	-17.192	1.937	0.959	3.82909	1.94396
A-82	hsa-miR-191-4395410	-6.124	-5.233	-5.217	0.891	0.907	1.85446	1.87514
A-83	hsa-miR-192-4373108	-15.123	-13.217	-12.213	1.906	2.91	3.74769	7.51618
A-84	hsa-miR-193a-3p-4395361	-16.094	-17.211	-17.297	-1.117	-1.203	0.461052	0.434371
A-85	hsa-miR-193a-5p-4395392	-16.131	-14.234	-18.282	1.897	-2.151	3.72438	0.225156
A-86	hsa-miR-193b-4395478	-8.132	-7.229	-10.216	0.903	-2.084	1.86995	0.23586
A-87	hsa-miR-194-4373106	-17.153	-15.228	-14.207	1.925	2.946	3.79737	7.7061
A-88	hsa-miR-195-4373105	-13.128	-12.22	-12.234	0.908	0.894	1.87644	1.85832
A-89	hsa-miR-196b-4395326		-13.214	-13.191
A-90	hsa-miR-197-4373102	-11.131	-8.244	-7.235	2.887	3.896	7.39731	14.8872
A-91	hsa-miR-198-4395384
A-92	hsa-miR-199a-3p-4395415	-16.113	-8.254	-9.193	7.859	6.92	232.164	121.095
A-93	hsa-miR-199a-5p-4373272	-17.103	-16.229	-13.397	0.874	3.706	1.83274	13.0502
A-94	hsa-miR-199b-5p-4373100		-15.218	-14.995
A-95	hsa-miR-19a-4373099	-5.137	-5.233	-5.196	-0.096	-0.059	0.935623	0.959929
A-96	hsa-miR-19b-4373098	-2.131	-2.221	-2.201	-0.09	-0.07	0.939523	0.952638
A-97	hsa-miR-200a-4378069	-15.132	-7.013		8.119		278.011
A-98	hsa-miR-200b-4395362	-11.1	-16.253	-15.262	-5.153	-4.162	0.0281056	0.0558616
A-99	hsa-miR-200c-4395411	-6.125	-12.214	-13.244	-6.089	-7.119	0.0146902	0.00719395
A-100	hsa-miR-202-4395474		-17.536	-17.284
A-101	hsa-miR-203-4373095	-14.104	-12.101	-12.272	2.003	1.832	4.00833	3.5603
A-102	hsa-miR-204-4373094	-10.103	-7.229	-8.217	2.874	1.886	7.33095	3.69609
A-103	hsa-miR-205-4373093	-15.131
A-104	hsa-miR-208-4373091
A-105	hsa-miR-208b-4395401	-7.986	-16.222	-7.143	-8.236	0.843	0.00331678	1.79378
A-106	hsa-miR-20a-4373286	-6.128	-5.217	-6.208	0.911	-0.08	1.88035	0.946058
A-107	hsa-miR-20b-4373263	-6.102	-5.201	-6.187	0.901	-0.085	1.86736	0.942785
A-108	hsa-miR-21-4373090	-10.121	-6.214	-7.185	3.907	2.936	15.0011	7.65287
A-109	hsa-miR-210-4373089	-12.154	-10.225	-9.192	1.929	2.962	3.80791	7.79203
A-110	hsa-miR-211-4373088	-12.966	-8.666	-10.166	4.3	2.8	19.6983	6.9644
A-111	hsa-miR-212-4373087	-16.138	-11.222	-12.208	4.916	3.93	30.19	15.2422
A-112	hsa-miR-214-4395417		-8.228	-11.22
A-113	hsa-miR-215-4373084	-16.15	-13.406	-15.288	2.744	0.862	6.69925	1.81756
A-114	hsa-miR-216a-4395331			-15.218
A-115	hsa-miR-216b-4395437		-13.228	-11.228
A-116	hsa-miR-217-4395448			-14.213
A-117	hsa-miR-218-4373081	-13.099	-7.209	-8.197	5.89	4.902	59.3016	29.8985
A-118	hsa-miR-219-1-3p-4395206		-12.228	-12.219
A-119	hsa-miR-219-2-3p-4395501		-15.251	-13.206
A-120	hsa-miR-219-5p-4373080	-17.126	-14.245	-12.222	2.881	4.904	7.36661	29.94
A-121	hsa-miR-22-4373079	-17.02	-11.285	-9.339	5.735	7.681	53.2607	205.216
A-122	hsa-miR-220-4373078
A-123	hsa-miR-220b-4395317
A-124	hsa-miR-220c-4395322
A-125	hsa-miR-221-4373077	-10.136	-8.2	-9.202	1.936	0.934	3.82643	1.91057
A-126	hsa-miR-222-4395387	-6.103	-5.206	-5.171	0.897	0.932	1.86219	1.90792
A-127	hsa-miR-223-4395406	-17.153	-16.184	-16.199	0.969	0.954	1.95748	1.93724
A-128	hsa-miR-224-4395210	-14.117	-12.208	-14.234	1.909	-0.117	3.75549	0.922103
A-129	hsa-miR-23a-4373074		-12.215	-12.309
A-130	hsa-miR-23b-4373073		-14.284	-14.238
A-131	hsa-miR-24-4373072	-8.133	-3.224	-5.204	4.909	2.929	30.0439	7.61582
A-132	hsa-miR-25-4373071	-11.1	-10.203	-11.211	0.897	-0.111	1.86219	0.925946
A-133	hsa-miR-26a-4395166	-9.119	-7.234	-7.216	1.885	1.903	3.69353	3.7399
A-134	hsa-miR-26b-4395167	-13.105	-10.242	-9.2	2.863	3.905	7.27527	14.9804
A-135	hsa-miR-27a-4373287	-14.098	-10.224	-12.189	3.874	1.909	14.6619	3.75549
A-136	hsa-miR-27b-4373068	-15.118	-11.235	-12.202	3.883	2.916	14.7536	7.54751
A-137	hsa-miR-28-3p-4395557	-10.107	-7.207	-8.195	2.9	1.912	7.46426	3.7633
A-138	hsa-miR-28-5p-4373067	-13.109	-10.208	-12.23	2.901	0.879	7.46944	1.8391
A-139	hsa-miR-296-3p-4395212	-16.114
A-140	hsa-miR-296-5p-4373066	-12.148
A-141	hsa-miR-298-4395301
A-142	hsa-miR-299-3p-4373189		-7.954	-9.312
A-143	hsa-miR-299-5p-4373188	-14.129	-13.219	-14.221	0.91	-0.092	1.87905	0.938221
A-144	hsa-miR-29a-4395223	-10.094	-9.192	-9.175	0.902	0.919	1.86865	1.8908
A-145	hsa-miR-29b-4373288	-10.078	-17.203	-18.216	-7.125	-8.138	0.00716409	0.00354991
A-146	hsa-miR-29c-4395171	-15.131	-13.228	-13.223	1.903	1.908	3.7399	3.75288
A-147	hsa-miR-301a-4373064	-11.123	-8.248	-8.214	2.875	2.909	7.33603	7.51097
A-148	hsa-miR-301b-4395503	-14.105	-10.209	-11.217	3.896	2.888	14.8872	7.40244
A-149	hsa-miR-302a-4378070	-4.116	-12.209	-15.217	-8.093	-11.101	0.00366239	0.000455267
A-150	hsa-miR-302b-4378071	-2.114	-10.234	-12.205	-8.12	-10.091	0.00359448	0.000916867
A-151	hsa-miR-302c-4378072	-4.077	-14.21	-14.175	-10.133	-10.098	0.00089056	0.000912429
A-152	hsa-miR-30b-4373290	-9.138	-6.244	-6.224	2.894	2.914	7.43329	7.53705
A-153	hsa-miR-30c-4373060	-7.081	-4.215	-4.2	2.866	2.881	7.29041	7.36661
A-154	hsa-miR-31-4395390	-9.117	-9.247	-11.222	-0.13	-2.105	0.913831	0.232451
A-155	hsa-miR-32-4395220	-17.117	-16.224	-15.222	0.893	1.895	1.85703	3.71922
A-156	hsa-miR-320-4395388	-9.124	-7.223	-7.202	1.901	1.922	3.73472	3.78948
A-157	hsa-miR-323-3p-4395338	-9.117	-8.225	-8.207	0.892	0.91	1.85575	1.87905
A-158	hsa-miR-324-3p-4395272	-14.115	-11.22	-12.219	2.895	1.896	7.43844	3.7218
A-159	hsa-miR-324-5p-4373052	-17.103	-11.217	-11.193	5.886	5.91	59.1374	60.1295
A-160	hsa-miR-325-4373051			-15.615
A-161	hsa-miR-326-4373050
A-162	hsa-miR-328-4373049	-15.121	-10.21	-9.205	4.911	5.916	30.0856	60.38
A-163	hsa-miR-329-4373191		-17.374	-18.192
A-164	hsa-miR-330-3p-4373047	-13.12	-13.255	-13.247	-0.135	-0.127	0.91067	0.915734
A-165	hsa-miR-330-5p-4395341		-16.192	-15.392
A-166	hsa-miR-331-3p-4373046	-8.104	-6.219	-5.227	1.885	2.877	3.69353	7.34621
A-167	hsa-miR-331-5p-4395344		-12.227	-13.227
A-168	hsa-miR-335-4373045	-13.103	-10.226	-10.223	2.877	2.88	7.34621	7.3615
A-169	hsa-miR-337-5p-4395267	-16.135	-16.235	-17.214	-0.1	-1.079	0.933033	0.473357
A-170	hsa-miR-338-3p-4395363	-10.057	-10.47	-17.217	-0.413	-7.16	0.75106	0.00699238
A-171	hsa-miR-339-3p-4395295	-13.125	-10.228	-9.211	2.897	3.914	7.44876	15.0741
A-172	hsa-miR-339-5p-4395368	-14.103	-11.232	-11.216	2.871	2.887	7.31572	7.39731
A-173	hsa-miR-33b-4395196
A-174	hsa-miR-340-4395369	-12.097	-9.207	-8.189	2.89	3.908	7.4127	15.0115
A-175	hsa-miR-342-3p-4395371	-9.146	-6.232	-5.213	2.914	3.933	7.53705	15.2739
A-176	hsa-miR-342-5p-4395258		-16.182	-17.258
A-177	hsa-miR-345-4395297	-10.116	-7.232	-7.194	2.884	2.922	7.38194	7.57896
A-178	hsa-miR-346-4373038			-14.188
A-179	hsa-miR-34a-4395168	-12.099	-10.208	-11.213	1.891	0.886	3.70892	1.84805
A-180	hsa-miR-34c-5p-4373036	-16.141	-14.24	-17.244	1.901	-1.103	3.73472	0.465547
A-181	hsa-miR-361-5p-4373035	-14.14	-13.248	-13.243	0.892	0.897	1.85575	1.86219
A-182	hsa-miR-362-3p-4395228		-16.242	-16.208
A-183	hsa-miR-362-5p-4378092	-13.102	-13.219	-12.222	-0.117	0.88	0.922103	1.84038
A-184	hsa-miR-363-4378090	-13.088	-12.237	-12.209	0.851	0.879	1.80375	1.8391
A-185	hsa-miR-365-4373194	-11.117	-10.234	-13.217	0.883	-2.1	1.84421	0.233258
A-186	hsa-miR-367-4373034	-4.113	-13.215	-15.218	-9.102	-11.105	0.00181981	0.000454006
A-187	hsa-miR-369-3p-4373032			-18.286
A-188	hsa-miR-369-5p-4373195	-16.099	-16.223	-17.207	-0.124	-1.108	0.91764	0.463937
A-189	hsa-miR-370-4395386	-12.162	-10.238	-10.211	1.924	1.951	3.79474	3.86642
A-190	hsa-miR-371-3p-4395235	-11.139		-14.017		-2.878		0.13603
A-191	hsa-miR-372-4373029	-5.129	-16.245	-17.215	-11.116	-12.086	0.000450558	0.000230013
A-192	hsa-miR-373-4378073	-13.122
A-193	hsa-miR-374a-4373028	-11.123	-9.212	-9.205	1.911	1.918	3.7607	3.77899
A-194	hsa-miR-374b-4381045	-8.101	-7.205	-7.209	0.896	0.892	1.8609	1.85575
A-195	hsa-miR-375-4373027		-17.237	-16.218
A-196	hsa-miR-376a-4373026	-9.11	-9.227	-10.215	-0.117	-1.105	0.922103	0.464902
A-197	hsa-miR-376b-4373196
A-198	hsa-miR-376c-4395233	-9.141	-8.251	-8.225	0.89	0.916	1.85318	1.88688
A-199	hsa-miR-377-4373025
A-200	hsa-miR-379-4373349	-12.128	-11.202	-11.192	0.926	0.936	1.9	1.91322
A-201	hsa-miR-380-4373022		-16.245	-17.264
A-202	hsa-miR-381-4373020			-17.217
A-203	hsa-miR-382-4373019	-12.133	-9.223	-9.22	2.91	2.913	7.51618	7.53183
A-204	hsa-miR-383-4373018		-16.235	-13.207
A-205	hsa-miR-384-4373017
A-206	hsa-miR-409-5p-4395442	-16.108	-15.231	-16.212	0.877	-0.104	1.83655	0.93045
A-207	hsa-miR-410-4378093	-12.122	-11.227	-11.201	0.895	0.921	1.85961	1.89343
A-208	hsa-miR-411-4381013	-10.108	-10.238	-10.234	-0.13	-0.126	0.913831	0.916369
A-209	hsa-miR-412-4373199			-17.244
A-210	hsa-miR-422a-4395408	-14.118	-16.214	-15.218	-2.096	-1.1	0.233906	0.466516
A-211	hsa-miR-423-5p-4395451	-14.127	-14.229	-13.215	-0.102	0.912	0.93174	1.88165
A-212	hsa-miR-424-4373201		-15.217	-16.192
A-213	hsa-miR-425-4380926	-10.128	-10.258	-10.229	-0.13	-0.101	0.913831	0.932386
A-214	hsa-miR-429-4373203	-15.115
A-215	hsa-miR-431-4395173	-9.123	-10.242	-11.226	-1.119	-2.103	0.460413	0.232774
A-216	hsa-miR-433-4373205	-13.104	-11.21	-11.195	1.894	1.909	3.71664	3.75549
A-217	hsa-miR-448-4373206
A-218	hsa-miR-449a-4373207	-16.094	-12.201	-14.222	3.893	1.872	14.8563	3.6604
A-219	hsa-miR-449b-4381011	-16.035	-13.239	-15.224	2.796	0.811	6.94512	1.75443
A-220	hsa-miR-450a-4395414	-10.416
A-221	hsa-miR-450b-3p-4395319	-11.189	-9.143	-9.341	2.046	1.848	4.12959	3.60001
A-222	hsa-miR-450b-5p-4395318	-17.101	-15.216	-18.049	1.885	-0.948	3.69353	0.518351
A-223	hsa-miR-451-4373360			-16.021
A-224	hsa-miR-452-4395440	-16.114	-12.213	-14.208	3.901	1.906	14.9389	3.74769
A-225	hsa-miR-453-4395429		-16.23	-17.237
A-226	hsa-miR-454-4395434	-9.118	-6.19	-6.179	2.928	2.939	7.61055	7.6688
A-227	hsa-miR-455-3p-4395355	-15.123	-12.236	-13.235	2.887	1.888	7.39731	3.70122
A-228	hsa-miR-455-5p-4378098	-14.104	-12.254	-13.224	1.85	0.88	3.605	1.84038
A-229	hsa-miR-483-5p-4395449	-16.081	-15.19	-15.216	0.891	0.865	1.85446	1.82134
A-230	hsa-miR-484-4381032	-6.111	-4.201	-5.198	1.91	0.913	3.75809	1.88296
A-231	hsa-miR-485-3p-4378095	-11.1	-11.206	-11.192	-0.106	-0.092	0.929161	0.938221
A-232	hsa-miR-485-5p-4373212	-14.196	-13.234	-13.252	0.962	0.944	1.94801	1.92385
A-233	hsa-miR-486-3p-4395204	-14.148	-15.243	-14.23	-1.095	-0.082	0.468136	0.944747
A-234	hsa-miR-486-5p-4378096	-12.094	-13.205	-12.209	-1.111	-0.115	0.462973	0.923382
A-235	hsa-miR-487a-4378097	-15.144	-14.165	-15.208	0.979	-0.064	1.9711	0.956608
A-236	hsa-miR-487b-4378102	-12.125	-11.24	-10.208	0.885	1.917	1.84676	3.77637
A-237	hsa-miR-488-4395468	-17.094	-15.22	-13.212	1.874	3.882	3.66547	14.7434
A-238	hsa-miR-489-4395469	-12.104	-14.228	-16.224	-2.124	-4.12	0.22941	0.0575117
A-239	hsa-miR-490-3p-4373215	-16.414
A-240	hsa-miR-491-3p-4395471
A-241	hsa-miR-491-5p-4381053	-13.093	-11.199	-11.185	1.894	1.908	3.71664	3.75288
A-242	hsa-miR-492-4373217
A-243	hsa-miR-493-4395475	-15.122	-14.211	-15.228	0.911	-0.106	1.88035	0.929161
A-244	hsa-miR-494-4395476	-11.139	-10.216	-11.21	0.923	-0.071	1.89605	0.951978
A-245	hsa-miR-495-4381078	-10.108	-10.218	-11.222	-0.11	-1.114	0.926588	0.462011
A-246	hsa-miR-496-4386771	-10.093		-18.212		-8.119		0.00359698
A-247	hsa-miR-499-3p-4395538
A-248	hsa-miR-499-5p-4381047			-17.263
A-249	hsa-miR-500-4395539	-16.154	-14.26	-14.217	1.894	1.937	3.71664	3.82909
A-250	hsa-miR-501-3p-4395546		-16.253	-15.252
A-251	hsa-miR-501-5p-4373226	-13.163	-12.197	-12.182	0.966	0.981	1.95342	1.97383
A-252	hsa-miR-502-3p-4395194		-17.22	-17.199
A-253	hsa-miR-502-5p-4373227	-16.119	-16.226	-16.232	-0.107	-0.113	0.928517	0.924663
A-254	hsa-miR-503-4373228	-16.111	-16.224		-0.113		0.924663
A-255	hsa-miR-504-4395195	-14.15	-14.24	-13.209	-0.09	0.941	0.939523	1.91986
A-256	hsa-miR-505-4395200	-11.932	-14.258	-14.232	-2.326	-2.3	0.199436	0.203063
A-257	hsa-miR-506-4373231	9.471
A-258	hsa-miR-507-4373232
A-259	hsa-miR-508-3p-4373233		-16.223	-17.206
A-260	hsa-miR-508-5p-4395203			-11.652
A-261	hsa-miR-509-3-5p-4395266
A-262	hsa-miR-509-5p-4395346		-16.259	-17.242
A-263	hsa-miR-510-4395352			-16.276
A-264	hsa-miR-511-4373236		-16.211
A-265	hsa-miR-512-3p-4381034	-7.108	-13.984	-17.227	-6.876	-10.119	0.00851369	0.000899244
A-266	hsa-miR-512-5p-4373238	-15.125		-14.406		0.719		1.64604
A-267	hsa-miR-513-5p-4395201	-14.634		4.545		19.179		593546
A-268	hsa-miR-515-3p-4395480	-15.143	-17.587		-2.444		0.183773
A-269	hsa-miR-515-5p-4373242	-13.107		-12.25		0.857		1.81127
A-270	hsa-miR-516a-5p-4395527	-14.452	-15.319		-0.867		0.548286
A-271	hsa-miR-516b-4395172	-14.139	-10.021		4.118		17.3637
A-272	hsa-miR-517a-4395513	-8.115		-7.336		0.779		1.71594
A-273	hsa-miR-517b-4373244	-9.101	-16.038		-6.937		0.00816122
A-274	hsa-miR-517c-4373264	-9.117
A-275	hsa-miR-518a-3p-4395508	-13.125		-7.354		5.771		54.6065
A-276	hsa-miR-518a-5p-4395507
A-277	hsa-miR-518b-4373246	-11.129	-17.311	-16.952	-6.182	-5.823	0.0137731	0.0176645
A-278	hsa-miR-518c-4395512	-14.129
A-279	hsa-miR-518d-3p-4373248	-15.339	-16.114	-15.165	-0.775	0.174	0.584389	1.12818
A-280	hsa-miR-518d-5p-4395500	-13.102
A-281	hsa-miR-518e-4395506	-11.094	-17.182	-17.729	-6.088	-6.635	0.0147004	0.0100616
A-282	hsa-miR-518f-4395499	-11.082	-17.004	-18.244	-5.922	-7.162	0.016493	0.0069827
A-283	hsa-miR-519a-4395526	-10.125	-16.199	-18.229	-6.074	-8.104	0.0148438	0.00363457
A-284	hsa-miR-519c-3p-4373251	-14.116
A-285	hsa-miR-519d-4395514	-10.083
A-286	hsa-miR-519e-4395481	-13.181	-17.073		-3.892		0.0673583
A-287	hsa-miR-520a-3p-4373268	-14.127	-1.265	-18.218	12.862	-4.091	7444.71	0.0586795
A-288	hsa-miR-520a-5p-4378085	-17.257
A-289	hsa-miR-520b-4373252	-13.169
A-290	hsa-miR-520d-5p-4395504
A-291	hsa-miR-520e-4373255	-16.134
A-292	hsa-miR-520f-4373256	-17.204
A-293	hsa-miR-520g-4373257	-9.12
A-294	hsa-miR-521-4373259		-15.381
A-295	hsa-miR-522-4395524	-12.136	-16.421	-16.034	-4.285	-3.898	0.0512964	0.0670788
A-296	hsa-miR-523-4395497	-15.129		-14.295		0.834		1.78262
A-297	hsa-miR-524-5p-4395174
A-298	hsa-miR-525-3p-4395496	-11.161		-6.788		4.373		20.7207
A-299	hsa-miR-525-5p-4378088	-15.127
A-300	hsa-miR-526b-4395493	-15.142
A-301	hsa-miR-532-3p-4395466	-13.114	-11.224	-11.212	1.89	1.902	3.70635	3.73731
A-302	hsa-miR-532-5p-4380928	-12.149	-10.252	-10.243	1.897	1.906	3.72438	3.74769
A-303	hsa-miR-539-4378103	-11.105	-9.194	-9.188	1.911	1.917	3.7607	3.77637
A-304	hsa-miR-541-4395312	-16.098	-16.235	-17.216	-0.137	-1.118	0.909408	0.460732
A-305	hsa-miR-542-3p-4378101	-10.681	-16.218	-17.209	-5.537	-6.528	0.0215376	0.0108362
A-306	hsa-miR-542-5p-4395351
A-307	hsa-miR-544-4395376			-8.393
A-308	hsa-miR-545-4395378	-16.079	-16.199	-15.188	-0.12	0.891	0.920188	1.85446
A-309	hsa-miR-548a-3p-4380948
A-310	hsa-miR-548a-5p-4395523	-12.103
A-311	hsa-miR-548b-3p-4380951			-15.07
A-312	hsa-miR-548b-5p-4395519			-16.215
A-313	hsa-miR-548c-3p-4380993
A-314	hsa-miR-548c-5p-4395540	-17.115	-17.4	-18.202	-0.285	-1.087	0.820742	0.470739
A-315	hsa-miR-548d-3p-4381008		-11.062
A-316	hsa-miR-548d-5p-4395348	-16.207	-16.243	-17.268	-0.036	-1.061	0.975355	0.4793
A-317	hsa-miR-551b-4380945		-16.249	-15.232
A-318	hsa-miR-556-3p-4395456			-15.41
A-319	hsa-miR-556-5p-4395455			-18.023
A-320	hsa-miR-561-4380938			-18.041
A-321	hsa-miR-570-4395458		-16.228
A-322	hsa-miR-574-3p-4395460	-11.139	-7.259	-8.222	3.88	2.917	14.723	7.55274
A-323	hsa-miR-576-3p-4395462	-16.096	-16.205	-16.215	-0.109	-0.119	0.927231	0.920826
A-324	hsa-miR-576-5p-4395461	-12.523	-16.255		-3.732		0.0752586
A-325	hsa-miR-579-4395509	-14.135		-16.217		-2.082		0.236187
A-326	hsa-miR-582-3p-4395510			-9.461
A-327	hsa-miR-582-5p-4395175			-16.207
A-328	hsa-miR-589-4395520			-17.189
A-329	hsa-miR-590-5p-4395176	-11.105	-9.212	-9.2	1.893	1.905	3.71407	3.74509
A-330	hsa-miR-597-4380960	-17.103	-16.22	-15.2	0.883	1.903	1.84421	3.7399
A-331	hsa-miR-598-4395179	-12.108	-10.237	-9.205	1.871	2.903	3.65786	7.4798
A-332	hsa-miR-615-3p-4386777		-14.221	-14.103
A-333	hsa-miR-615-5p-4395464
A-334	hsa-miR-616-4395525
A-335	hsa-miR-618-4380996	-16.984	-17.231	-16.21	-0.247	0.774	0.842647	1.71
A-336	hsa-miR-624-4395541
A-337	hsa-miR-625-4395542	-15.134	-14.262	-14.227	0.872	0.907	1.8302	1.87514
A-338	hsa-miR-627-4380967		-16.194	-18.169
A-339	hsa-miR-628-5p-4395544	-16.066	-11.173	-11.199	4.893	4.867	29.7125	29.1819
A-340	hsa-miR-629-4395547	-17.141	-16.206	-17.177	0.935	-0.036	1.91189	0.975355
A-341	hsa-miR-636-4395199	-16.136	-15.231	-17.252	0.905	-1.116	1.87254	0.461371
A-342	hsa-miR-642-4380995			-17.208
A-343	hsa-miR-651-4381007
A-344	hsa-miR-652-4395463	-16.128	-12.241	-13.242	3.887	2.886	14.7946	7.39218
A-345	hsa-miR-653-4395403
A-346	hsa-miR-654-3p-4395350	-17.115	-16.218	-17.2	0.897	-0.085	1.86219	0.942785
A-347	hsa-miR-654-5p-4381014	-16.255	-16.253	-15.263	0.002	0.992	1.00139	1.98894
A-348	hsa-miR-655-4381015	-12.137	-12.216	-12.236	-0.079	-0.099	0.946714	0.93368
A-349	hsa-miR-660-4380925	-12.13	-10.223	-10.21	1.907	1.92	3.75028	3.78423
A-350	hsa-miR-671-3p-4395433	-14.133	-14.242	-14.21	-0.109	-0.077	0.927231	0.948027
A-351	hsa-miR-672-4395438
A-352	hsa-miR-674-4395193		-17.101
A-353	hsa-miR-708-4395452	-12.116	-8.213	-8.199	3.903	3.917	14.9596	15.1055
A-354	hsa-miR-744-4395435	-11.111	-10.229	-10.215	0.882	0.896	1.84293	1.8609
A-355	hsa-miR-758-4395180	-13.126	-12.218	-13.21	0.908	-0.084	1.87644	0.943438
A-356	hsa-miR-871-4395465
A-357	hsa-miR-872-4395375	-15.172
A-358	hsa-miR-873-4395467		-17.224	-17.219
A-359	hsa-miR-874-4395379	-13.104	-16.446	-15.3	-3.342	-2.196	0.0986184	0.218242
A-360	hsa-miR-875-3p-4395315
A-361	hsa-miR-876-3p-4395336			-17.241
A-362	hsa-miR-876-5p-4395316	-16.113	-16.234	-16.226	-0.121	-0.113	0.91955	0.924663
A-363	hsa-miR-885-3p-4395483	-16.164
A-364	hsa-miR-885-5p-4395407	-14.118	-15.232	-13.213	-1.114	0.905	0.462011	1.87254
A-365	hsa-miR-886-3p-4395305	-10.137	-11.232	-12.207	-1.095	-2.07	0.468136	0.238159
A-366	hsa-miR-886-5p-4395304	-10.125	-9.231	-12.216	0.894	-2.091	1.85832	0.234718
A-367	hsa-miR-887-4395485	-14.101	-12.227	-13.252	1.874	0.849	3.66547	1.80125
A-368	hsa-miR-888-4395323		-16.078	-16.233
A-369	hsa-miR-889-4395313	-15.103	-14.237	-13.189	0.866	1.914	1.8226	3.76853
A-370	hsa-miR-890-4395320			-15.869
A-371	hsa-miR-891a-4395302		-16.233	-16.221
A-372	hsa-miR-891b-4395321
A-373	hsa-miR-892a-4395306		-10.378
A-374	hsa-miR-9-4373285	-13.124	-4.221	-3.206	8.903	9.918	478.707	967.421
A-375	hsa-miR-92a-4395169	-8.138	-7.235	-8.229	0.903	-0.091	1.86995	0.938872
A-376	hsa-miR-93-4373302	-7.106	-6.209	-7.201	0.897	-0.095	1.86219	0.936272
A-377	hsa-miR-95-4373011	-14.117	-13.227	-11.223	0.89	2.894	1.85318	7.43329
A-378	hsa-miR-96-4373372	-17.196
A-379	hsa-miR-98-4373009	1.159	-15.225	-14.199	-16.384	-15.358	1.1693e-05	2.38112e-05
A-380	hsa-miR-99a-4373008	-14.121	-7.277	-7.215	6.844	6.906	114.881	119.926
A-381	hsa-miR-99b-4373007	-10.11	-6.245	-7.249	3.865	2.861	14.5707	7.26519
B-8	hsa-let-7a*-4395418
B-9	hsa-let-7b*-4395515
B-10	hsa-let-7d*-4378108		-15.202	-17.157
B-11	hsa-let-7e*-4395518		-17.083	-17.104
B-12	hsa-let-7f-1*-4395528			-17.089
B-13	hsa-let-7f-2*-4395529
B-14	hsa-let-7g*-4395229		-12.876	-16.109
B-15	hsa-let-7i*-4395283		-17.117	-17.067
B-16	hsa-miR-100*-4395253		-18.216	-18.184
B-17	hsa-miR-101*-4395254			-16.759
B-18	hsa-miR-105*-4395279
B-19	hsa-miR-106a*-4395281	-17.079	-15.764	-16.089	1.315	0.99	2.48802	1.98618
B-20	hsa-miR-106b*-4395491	-17.157	-16.168	-13.156	0.989	4.001	1.98481	16.0111
B-21	hsa-miR-10a*-4395399
B-22	hsa-miR-10b*-4395426		-17.121	-15.091
B-23	hsa-miR-122*-4395241
B-24	hsa-miR-124*-4395308	-15.108	-15.137	-13.102	-0.029	2.006	0.980099	4.01667
B-25	hsa-miR-125b-1*-4395489		-16.149	-14.093
B-26	hsa-miR-125b-2*-4395269	-16.571	-11.129	-11.043	5.442	5.528	43.4716	46.1417
B-27	hsa-miR-126*-4373269	-15.094	-14.117	-15.089	0.977	0.005	1.96837	1.00347
B-28	hsa-miR-130a*-4395242
B-29	hsa-miR-130b*-4395225	-11.062	-8.157	-8.121	2.905	2.941	7.49018	7.67943
B-30	hsa-miR-132*-4395243			-17.108
B-31	hsa-miR-135a*-4395343	-9.101	-9.121	-9.101	-0.02	0	0.986233	1
B-32	hsa-miR-135b*-4395270	-14.094	-14.136	-14.086	-0.042	0.008	0.971307	1.00556
B-33	hsa-miR-136*-4395211	-14.099	-13.11	-12.079	0.989	2.02	1.98481	4.05584
B-34	hsa-miR-138-1*-4395273	-16.083	-15.118	-15.087	0.965	0.996	1.95206	1.99446
B-35	hsa-miR-138-2*-4395255			-14.115
B-36	hsa-miR-141*-4395256	-12.413
B-37	hsa-miR-143*-4395257
B-38	hsa-miR-144*-4395259	-10.004	-17.195	-18.096	-7.191	-8.092	0.00684374	0.00366493
B-39	hsa-miR-145*-4395260		-16.125	-17.096
B-40	hsa-miR-146a*-4395274
B-41	hsa-miR-148a*-4395245	-15.198		-15.15		0.048		1.03383
B-42	hsa-miR-148b*-4395271	-16.079	-15.125	-15.078	0.954	1.001	1.93724	2.00139
B-43	hsa-miR-149*-4395275	-12.16	-13.112	-13.974	-0.952	-1.814	0.516915	0.284401
B-44	hsa-miR-151-3p-4395365	-10.05	-8.103	-8.053	1.947	1.997	3.85572	3.99169
B-45	hsa-miR-154*-4378065	-16.096	-17.137	-17.105	-1.041	-1.009	0.48599	0.496891
B-46	hsa-miR-155*-4395398
B-47	hsa-miR-15a*-4395530		-15.125	-15.092
B-48	hsa-miR-15b*-4395284	-10.204	-10.139	-10.109	0.065	0.095	1.04608	1.06807
B-49	hsa-miR-16-1*-4395531	-17.132	-16.138	-16.109	0.994	1.023	1.9917	2.03214
B-50	hsa-miR-16-2*-4395282		-16.21
B-51	hsa-miR-17*-4395532	-15.12	-16.143	-16.112	-1.023	-0.992	0.492092	0.50278
B-52	hsa-miR-181a*-4373086		-13.132	-14.112
B-53	hsa-miR-181a-2*-4395428	-17.115	-10.12	-10.091	6.995	7.024	127.557	130.147
B-54	hsa-miR-181c*-4395444			-13.13
B-55	hsa-miR-182*-4378066
B-56	hsa-miR-183*-4395381	-13.114	-15.884	-16.132	-2.77	-3.018	0.146604	0.12345
B-57	hsa-miR-185*-4395215
B-58	hsa-miR-186*-4395216	-15.258
B-59	hsa-miR-188-5p-4395431	-13.104	-13.153	-12.08	-0.049	1.024	0.966606	2.03355
B-60	hsa-miR-18a*-4395534	-13.113	-13.136	-14.109	-0.023	-0.996	0.984184	0.501388
B-61	hsa-miR-18b*-4395421	-13.162	-13.086	-12.906	0.076	0.256	1.05409	1.19416
B-62	hsa-miR-190b-4395374	-16.06	-17.128	-16.092	-1.068	-0.032	0.47698	0.978063
B-63	hsa-miR-192*-4395383		-18.178	-17.086
B-64	hsa-miR-193b*-4395477		-15.069	-14.069
B-65	hsa-miR-194*-4395490
B-66	hsa-miR-195*-4395218
B-67	hsa-miR-19a*-4395535	-16.097	-17.135		-1.038		0.487002
B-68	hsa-miR-19b-1*-4395536	-13.107	-13.122	-13.117	-0.015	-0.01	0.989657	0.993092
B-69	hsa-miR-19b-2*-4395537
B-70	hsa-miR-200a*-4373273	-15.082		-18.313		-3.231		0.106506
B-71	hsa-miR-200b*-4395385
B-72	hsa-miR-200c*-4395397	-16.101
B-73	hsa-miR-202*-4395473	-11.179		-9.639		1.54		2.90795
B-74	hsa-miR-206-4373092	-18.071	-17.09	-16.053	0.981	2.018	1.97383	4.05022
B-75	hsa-miR-20a*-4395548	-13.089	-14.137	-13.107	-1.048	-0.018	0.483638	0.987601
B-76	hsa-miR-20b*-4395422	-15.113	-17.153	-15.1	-2.04	0.013	0.243164	1.00905
B-77	hsa-miR-21*-4395549		-14.13	-15.08
B-78	hsa-miR-214*-4395404		-13.118	-13.083
B-79	hsa-miR-218-2*-4395405
B-80	hsa-miR-22*-4395412	-16.099	-13.121	-14.107	2.978	1.992	7.87893	3.97788
B-81	hsa-miR-221*-4395207	-17.09	-17.12	-17.09	-0.03	0	0.97942	1
B-82	hsa-miR-222*-4395208	-12.106	-12.139	-12.101	-0.033	0.005	0.977386	1.00347
B-83	hsa-miR-223*-4395209
B-84	hsa-miR-23a*-4395550
B-85	hsa-miR-23b*-4395237	-15.065
B-86	hsa-miR-24-1*-4395551		-16.134
B-87	hsa-miR-25*-4395553	-14.14	-17.167	-16.19	-3.027	-2.05	0.122682	0.241484
B-88	hsa-miR-26a-1*-4395554	-16.092	-16.125	-15.077	-0.033	1.015	0.977386	2.0209
B-89	hsa-miR-26a-2*-4395226		-18.131	-18.105
B-90	hsa-miR-26b*-4395555	-17.121	-15.132	-15.09	1.989	2.031	3.96962	4.08688
B-91	hsa-miR-27a*-4395556	-15.108	-13.123	-15.111	1.985	-0.003	3.95863	0.997923
B-92	hsa-miR-27b*-4395285	-17.132	-13.155	-14.101	3.977	3.031	15.7469	8.17376
B-93	hsa-miR-29a*-4395558			-16.108
B-94	hsa-miR-29b-1*-4395276
B-95	hsa-miR-29b-2*-4395277
B-96	hsa-miR-29c*-4381131		-17.099	-15.093
B-97	hsa-miR-302a*-4395492	-7.097	-15.135	-17.096	-8.038	-9.999	0.0038047	0.00097724
B-98	hsa-miR-302b*-4395230	-12.084
B-99	hsa-miR-302c*-4373277	-10.095	-17.14	-17.122	-7.045	-7.027	0.00757258	0.00766765
B-100	hsa-miR-302d*-4395231	-10.09	-17.177		-7.087		0.0073553
B-101	hsa-miR-302d-4373063	-4.02	-13.132	-13.56	-9.112	-9.54	0.00180724	0.0013433
B-102	hsa-miR-30a*-4373062	-13.075	-6.116	-5.085	6.959	7.99	124.414	254.232
B-103	hsa-miR-30a-4373061	-14.091	-10.116	-8.063	3.975	6.028	15.7251	65.2543
B-104	hsa-miR-30b*-4395240	-15.315		-17.116		-1.801		0.286976
B-105	hsa-miR-30c-1*-4395219	-7.196
B-106	hsa-miR-30c-2*-4395221		-17.045	-14.075
B-107	hsa-miR-30d*-4395416	-16.087	-13.137	-12.118	2.95	3.969	7.72749	15.6599
B-108	hsa-miR-30d-4373059	-13.03	-12.077	-9.943	0.953	3.087	1.93589	8.49727
B-109	hsa-miR-30e*-4373057	-12.074	-6.108	-5.08	5.966	6.994	62.5093	127.469
B-110	hsa-miR-30e-4395334	-12.053	-8.101	-6.053	3.952	6	15.4764	64
B-111	hsa-miR-32*-4395222
B-112	hsa-miR-335*-4395296	-11.109	-11.133	-11.086	-0.024	0.023	0.983502	1.01607
B-113	hsa-miR-337-3p-4395268		-13.839	-14.088
B-114	hsa-miR-33a*-4395247	-16.104	-15.123	-15.104	0.981	1	1.97383	2
B-115	hsa-miR-340*-4395370	-17.099	-12.131	-10.096	4.968	7.003	31.298	128.266
B-116	hsa-miR-34a*-4395427	-13.095	-13.13	-13.099	-0.035	-0.004	0.976032	0.997231
B-117	hsa-miR-34b*-4373037		-16.099
B-118	hsa-miR-361-3p-4395227	-13.122	-14.613	-12.527	-1.491	0.595	0.355766	1.51047
B-119	hsa-miR-363*-4380917		-14.132	-14.102
B-120	hsa-miR-367*-4395232
B-121	hsa-miR-373*-4373279			-10.902
B-122	hsa-miR-374a*-4395236	-18.076		-18.069		0.007		1.00486
B-123	hsa-miR-374b*-4395502	-17.128	10.752	-18.104	27.88	-0.976	2.47011e+08	0.508387
B-124	hsa-miR-376a*-4395238		-17.062	-17.115
B-125	hsa-miR-377*-4395239	-17.112	-17.215	-16.476	-0.103	0.636	0.931095	1.55401
B-126	hsa-miR-378*-4373024	-18.1	-18.133		-0.033		0.977386
B-127	hsa-miR-378-4395354	-10.059	-13.091	-11.044	-3.032	-0.985	0.122258	0.505226
B-128	hsa-miR-379*-4395244	-17.125	-17.127	-17.116	-0.002	0.009	0.998615	1.00626
B-129	hsa-miR-380*-4373021	-17.1	-17.116	-15.095	-0.016	2.005	0.988971	4.01389
B-130	hsa-miR-409-3p-4395443	-8.861	-7.185	-6.984	1.676	1.877	3.19541	3.6731
B-131	hsa-miR-411*-4395349	-16.116	-16.143	-15.104	-0.027	1.012	0.981459	2.0167
B-132	hsa-miR-424*-4395420	-16.209	-14.156	-14.161	2.053	2.048	4.14968	4.13532
B-133	hsa-miR-425*-4395413	-15.082	-11.098	-12.113	3.984	2.969	15.8235	7.82993
B-134	hsa-miR-431*-4395423		-17.183	-17.131
B-135	hsa-miR-432*-4378076	-15.079	-14.185	-15.109	0.894	-0.03	1.85832	0.97942
B-136	hsa-miR-432-4373280	-12.061	-10.118	-10.074	1.943	1.987	3.84504	3.96412
B-137	hsa-miR-452*-4395441	-16.172	-13.871	-16.007	2.301	0.165	4.92799	1.12117
B-138	hsa-miR-454*-4395185	-17.1	-14.124	-13.106	2.976	3.994	7.86802	15.9336
B-139	hsa-miR-488*-4373213			-17.111
B-140	hsa-miR-493*-4373218
B-141	hsa-miR-497*-4395479		-11.183
B-142	hsa-miR-497-4373222			-16.834
B-143	hsa-miR-498-4373223			-10.453
B-144	hsa-miR-500*-4373225			-15.105
B-145	hsa-miR-505*-4395198	-15.084	-14.11	-13.101	0.974	1.983	1.96428	3.95314
B-146	hsa-miR-509-3p-4395347	-15.038	-15.119	-16.097	-0.081	-1.059	0.945402	0.479965
B-147	hsa-miR-513-3p-4395202	-16.02	-17.157	-17.125	-1.137	-1.105	0.454704	0.464902
B-148	hsa-miR-516a-3p-4373183	-17.102	-18.119	-18.049	-1.017	-0.947	0.494143	0.51871
B-149	hsa-miR-517*-4378078	-17.134
B-150	hsa-miR-518c*-4378082	-17.135
B-151	hsa-miR-518e*-4395482	-17.122		-18.144		-1.022		0.492433
B-152	hsa-miR-518f*-4395498
B-153	hsa-miR-519b-3p-4395495	-13.26	-17.815	-19.291	-4.555	-6.031	0.0425411	0.0152928
B-154	hsa-miR-519e*-4378084
B-155	hsa-miR-520c-3p-4395511	-12.108	-17.077	-18.128	-4.969	-6.02	0.0319288	0.0154099
B-156	hsa-miR-520h-4373258	-12.136
B-157	hsa-miR-524-3p-4378087	-17.113	-18.443	-17.201	-1.33	-0.088	0.397768	0.940826
B-158	hsa-miR-526b*-4395494	-13.099	-18.117	-18.129	-5.018	-5.03	0.0308625	0.0306069
B-159	hsa-miR-541*-4395311
B-160	hsa-miR-543-4395487	-13.113	-13.12	-13.104	-0.007	0.009	0.99516	1.00626
B-161	hsa-miR-545*-4395377	-18.083	-17.126	-17.112	0.957	0.971	1.94127	1.9602
B-162	hsa-miR-549-4380921			-12.196
B-163	hsa-miR-550*-4380954	-14.089	-13.144	-13.111	0.945	0.978	1.92519	1.96973
B-164	hsa-miR-550-4395521	-16.104	-15.152	-15.108	0.952	0.996	1.93455	1.99446
B-165	hsa-miR-551a-4380929			-17.077
B-166	hsa-miR-551b*-4395457	-17.096	-15.137	-15.105	1.959	1.991	3.88792	3.97512
B-167	hsa-miR-552-4380930
B-168	hsa-miR-553-4380931
B-169	hsa-miR-554-4380932
B-170	hsa-miR-555-4380933
B-171	hsa-miR-557-4380935
B-172	hsa-miR-558-4380936		-13.979
B-173	hsa-miR-559-4380937	-17.256	-17.521	-17.391	-0.265	-0.135	0.832199	0.91067
B-174	hsa-miR-562-4380939
B-175	hsa-miR-563-4380940
B-176	hsa-miR-564-4380941	-17.091	-16.184	-15.298	0.907	1.793	1.87514	3.46535
B-177	hsa-miR-565-4380942	-13.082	-13.126	-13.11	-0.044	-0.028	0.969962	0.980779
B-178	hsa-miR-566-4380943	-15.066		-17.1		-2.034		0.244177
B-179	hsa-miR-567-4380944	-9.826	-8.178		1.648		3.13399
B-180	hsa-miR-569-4380946
B-181	hsa-miR-571-4381016	-14.488	-14.026	-14.232	0.462	0.256	1.37745	1.19416
B-182	hsa-miR-572-4381017	-13.897	-18.012	-15.396	-4.115	-1.499	0.0577114	0.353799
B-183	hsa-miR-573-4381018	-16.087	-15.215	-12.236	0.872	3.851	1.8302	14.43
B-184	hsa-miR-575-4381020		-18.21
B-185	hsa-miR-578-4381022
B-186	hsa-miR-580-4381024	-16.796	-16.917		-0.121		0.91955
B-187	hsa-miR-581-4386744			-17.429
B-188	hsa-miR-583-4381025	-15.158
B-189	hsa-miR-584-4381026		-14.974	-17.008
B-190	hsa-miR-585-4381027		-13.33
B-191	hsa-miR-586-4380949	-15.249	-14.87	-15.453	0.379	-0.204	1.30044	0.86814
B-192	hsa-miR-587-4380950	-14.256	-14.762	-15.95	-0.506	-1.694	0.704172	0.309069
B-193	hsa-miR-588-4380952
B-194	hsa-miR-589*-4380953	-16.112	-14.148	-15.085	1.964	1.027	3.90142	2.03778
B-195	hsa-miR-591-4380955
B-196	hsa-miR-592-4380956	-14.073	-13.137	-12.102	0.936	1.971	1.91322	3.9204
B-197	hsa-miR-593*-4380957
B-198	hsa-miR-593-4395522			-12.085
B-199	hsa-miR-595-4395178			-14.009
B-200	hsa-miR-596-4380959	-9.81	-9.219	-9.355	0.591	0.455	1.50629	1.37078
B-201	hsa-miR-599-4380962
B-202	hsa-miR-600-4380963
B-203	hsa-miR-601-4380965	-18.279	-18.355	-18.179	-0.076	0.1	0.948684	1.07177
B-204	hsa-miR-603-4380972
B-205	hsa-miR-604-4380973		-15.232	-15.455
B-206	hsa-miR-605-4386742	-12.782
B-207	hsa-miR-606-4380974		-14.158	-14.415
B-208	hsa-miR-607-4380975		-13.962
B-209	hsa-miR-608-4380976			-12.4
B-210	hsa-miR-609-4380978		-8.588	-8.634
B-211	hsa-miR-610-4380980	-15.088	-15.545	-15.097	-0.457	-0.009	0.7285	0.993781
B-212	hsa-miR-612-4380983
B-213	hsa-miR-613-4380989		-9.315	-10.586
B-214	hsa-miR-614-4380990
B-215	hsa-miR-616*-4380992	-17.087	-17.641	-17.092	-0.554	-0.005	0.681129	0.99654
B-216	hsa-miR-617-4380994	-15.196
B-217	hsa-miR-619-4380998
B-218	hsa-miR-621-4381001	-12.101
B-219	hsa-miR-622-4380961	-17.079
B-220	hsa-miR-623-4386740	-15.848	-18.043	-16.935	-2.195	-1.087	0.218393	0.470739
B-221	hsa-miR-624*-4380964	-17.146		-16.638		0.508		1.42208
B-222	hsa-miR-625*-4395543	-12.08	-10.111	-10.105	1.969	1.975	3.91497	3.93128
B-223	hsa-miR-626-4380966			-17.118
B-224	hsa-miR-628-3p-4395545	-17.113	-16.348	-14.625	0.765	2.488	1.69937	5.61
B-225	hsa-miR-629*-4380969	-14.11	-13.129	-13.12	0.981	0.99	1.97383	1.98618
B-226	hsa-miR-630-4380970	-14.056	-16.153	-15.134	-2.097	-1.078	0.233744	0.473685
B-227	hsa-miR-631-4380971
B-228	hsa-miR-632-4380977	-16.075	-16.15	-17.097	-0.075	-1.022	0.949342	0.492433
B-229	hsa-miR-633-4380979	-14.06	-10.985	-8.561	3.075	5.499	8.42689	45.2235
B-230	hsa-miR-634-4380981
B-231	hsa-miR-635-4380982
B-232	hsa-miR-637-4380985
B-233	hsa-miR-638-4380986	-15.046	-14.069	-16.177	0.977	-1.131	1.96837	0.456599
B-234	hsa-miR-639-4380987	-16.103	-16.518	-17.22	-0.415	-1.117	0.750019	0.461052
B-235	hsa-miR-640-4386743		-17.044
B-236	hsa-miR-641-4380988		-15.166	-15.617
B-237	hsa-miR-643-4380997		-16.33	-16.084
B-238	hsa-miR-644-4380999	-15.568	-15.633	-14.988	-0.065	0.58	0.955945	1.49485
B-239	hsa-miR-645-4381000
B-240	hsa-miR-646-4381002			-7.595
B-241	hsa-miR-647-4381003
B-242	hsa-miR-648-4381004			-16.309
B-243	hsa-miR-649-4381005		-7.851	-18.042
B-244	hsa-miR-650-4381006	-12.683	-15.255	-12.181	-2.572	0.502	0.168171	1.41618
B-245	hsa-miR-656-4380920	-15.021	-13.567	-12.909	1.454	2.112	2.73967	4.3229
B-246	hsa-miR-657-4380922	-10.668	-12.672	-10.875	-2.004	-0.207	0.249308	0.866337
B-247	hsa-miR-658-4380923	-10.974	-10.767		0.207		1.15429
B-248	hsa-miR-659-4380924	-15.503	-15.242	-14.894	0.261	0.609	1.19831	1.5252
B-249	hsa-miR-661-4381009	-12.133	-13.123	-13.148	-0.99	-1.015	0.503478	0.494828
B-250	hsa-miR-662-4381010		-6.775
B-251	hsa-miR-668-4395181	-14.913	-13.081	-11.818	1.832	3.095	3.5603	8.54452
B-252	hsa-miR-675-4395192	-10.267	-14.149		-3.882		0.0678268
B-253	hsa-miR-7-1*-4381118	-11.113	-11.132	-9.11	-0.019	2.003	0.986917	4.00833
B-254	hsa-miR-7-2*-4395425	-17.14	-15.149	-14.089	1.991	3.051	3.97512	8.28786
B-255	hsa-miR-7-4378130	-15.872		-15.099		0.773		1.70882
B-256	hsa-miR-708*-4395453		-18.391
B-257	hsa-miR-744*-4395436		-16.156	-16.099
B-258	hsa-miR-760-4395439	-13.13	-12.118	-12.085	1.012	1.045	2.0167	2.06337
B-259	hsa-miR-766-4395177	-11.36	-10.372	-9.751	0.988	1.609	1.98343	3.0504
B-260	hsa-miR-767-3p-4395184
B-261	hsa-miR-767-5p-4395182	-13.446	-15.567	-14.021	-2.121	-0.575	0.229888	0.671286
B-262	hsa-miR-768-3p-4395188	-13.054	-11.295	-8.969	1.759	4.085	3.38463	16.971
B-263	hsa-miR-769-3p-4395190		-17.111	-18.111
B-264	hsa-miR-769-5p-4395186	-12.922	-12.11	-10.82	0.812	2.102	1.75564	4.29304
B-265	hsa-miR-770-5p-4395189	-14.117	-13.134	-12.101	0.983	2.016	1.97657	4.04461
B-266	hsa-miR-801-4395183	-13.392	-16.446	-12.228	-3.054	1.164	0.120408	2.24078
B-267	hsa-miR-875-5p-4395314	-18.055	-17.008	-17.924	1.047	0.131	2.06623	1.09505
B-268	hsa-miR-877-4395402	-14.108	-12.098	-12.067	2.01	2.041	4.02782	4.11531
B-269	hsa-miR-888*-4395324	-14.171
B-270	hsa-miR-892b-4395325	-13.294	-14.853	-16.17	-1.559	-2.876	0.339386	0.136219
B-271	hsa-miR-9*-4395342	-16.108	-9.132	-7.117	6.976	8.991	125.888	508.816
B-272	hsa-miR-920-4395261
B-273	hsa-miR-921-4395262
B-274	hsa-miR-922-4395263			-18.064
B-275	hsa-miR-923-4395264	-7.971	-7.907	-7.695	0.064	0.276	1.04536	1.21083
B-276	hsa-miR-924-4395265
B-277	hsa-miR-92a-1*-4395248	-15.076	-17.106	-17.096	-2.03	-2.02	0.244855	0.246558
B-278	hsa-miR-92a-2*-4395249
B-279	hsa-miR-92b*-4395454	-14.159	-13.145	-12.093	1.014	2.066	2.0195	4.18724
B-280	hsa-miR-93*-4395250	-9.076	-8.108	-8.085	0.968	0.991	1.95613	1.98756
B-281	hsa-miR-933-4395287
B-282	hsa-miR-934-4395288
B-283	hsa-miR-935-4395289	-12.169	-8.835	-9.111	3.334	3.058	10.084	8.32817
B-284	hsa-miR-936-4395290
B-285	hsa-miR-937-4395291		-17.141	-17.114
B-286	hsa-miR-938-4395292	-12.99	-13.959	-11.462	-0.969	1.528	0.51086	2.88386
B-287	hsa-miR-939-4395293	-13.11	-8.187	-9.174	4.923	3.936	30.3369	15.3057
B-288	hsa-miR-941-4395294	-16.08	-14.136	-13.096	1.944	2.984	3.84771	7.91177
B-289	hsa-miR-942-4395298	-15.126	-14.1	-15.086	1.026	0.04	2.03637	1.02811
B-290	hsa-miR-943-4395299	7.859
B-291	hsa-miR-944-4395300		-18.11
B-292	hsa-miR-96*-4395251			-11.025
B-293	hsa-miR-99a*-4395252		-13.116	-11.094
B-294	hsa-miR-99b*-4395307	-15.087	-11.127	-12.101	3.96	2.986	15.5625	7.92274
