# Supplementary material for: Ago2 Immunoprecipitation Identifies Predicted MicroRNAs in Human Embryonic Stem Cells and Neural Precursors
Source: PLoS One. 2009 Sep 28;4(9):e7192. doi: 10.1371/journal.pone.0007192 (PMC2745660; doi:10.1371/journal.pone.0007192)
Supplement: File S2 — Excel file containing all microRNA predictions and expression levels. Contents of worksheets: 1. H1 predicted microRNAs: the list of 818 predicted microRNAs filtered as described in Figure 2B. This sheet matches the BED file in Supplemental File 2. 2. Ago2 IP novel: the 146 predicted microRNAs that were found to be enriched following Ago2 IP compared with IgG IP. The mean enrichment is shown for each stage (ESC and NSC). Also listed are the mature sequence of the predicted microRNA, the calculated seed (positions 2–8), a hyperlink to the TargetScan web site to search for targets, and the known human microRNAs matching the seed sequence. 3. Ago2 IP known: This sheet lists the 609 known microRNAs found to be enriched by Ago2 IP over IgG IP (see mean enrichment values). 4. hESC lines: The calculated counts per million expression levels in four human stem cell lines at two differentiation stages, used in creating Figure 3A. 5. Clustered expression: The calculated counts per million expression levels for all 609 known and 146 predicted microRNAs in three stages of hESC (ESC, NSC, and NRP), two iPS cultures (ESC and NSC, obtained from WiCell), and three adult tissues (brain, heart, kidney). Also listed are the cluster numbers matching Figures 3C, S6, and S7). (0.55 MB XLS) [file pone.0007192.s011.xls]

## Sheet: H1_predicted_microRNAs
H1 predicted microRNAs
Name	Chrom	Precursor Start	Precursor End	Strand	Mature Start	Mature End
chr1:236732-236770:+:ESC-NSC	chr1	236732	236770	+	236753	236770
chr1:556694-556753:+:NSC	chr1	556694	556753	+	556694	556718
chr1:559640-559698:-:ESC-NSC	chr1	559640	559698	-	559679	559698
chr1:571950-571988:+:ESC-NSC	chr1	571950	571988	+	571971	571988
chr1:1101603-1101663:-:NSC	chr1	1101603	1101663	-	1101643	1101663
chr1:1101991-1102039:-:ESC	chr1	1101991	1102039	-	1101991	1102012
chr1:2425768-2425822:-:NSC	chr1	2425768	2425822	-	2425768	2425793
chr1:3034410-3034450:+:NSC	chr1	3034410	3034450	+	3034434	3034450
chr1:4322324-4322387:-:NSC	chr1	4322324	4322387	-	4322366	4322387
chr1:4588022-4588084:-:ESC	chr1	4588022	4588084	-	4588068	4588084
chr1:5820736-5820815:-:NSC	chr1	5820736	5820815	-	5820736	5820751
chr1:6412490-6412532:-:NSC	chr1	6412490	6412532	-	6412490	6412508
chr1:15013622-15013672:-:NSC	chr1	15013622	15013672	-	15013622	15013637
chr1:17117513-17117551:-:NSC	chr1	17117513	17117551	-	17117513	17117528
chr1:20697481-20697521:+:ESC	chr1	20697481	20697521	+	20697481	20697494
chr1:21945198-21945242:+:ESC	chr1	21945198	21945242	+	21945198	21945211
chr1:23062248-23062295:-:ESC	chr1	23062248	23062295	-	23062248	23062265
chr1:26571172-26571216:-:ESC	chr1	26571172	26571216	-	26571172	26571189
chr1:29688038-29688104:-:NSC	chr1	29688038	29688104	-	29688038	29688053
chr1:30563409-30563473:-:NSC	chr1	30563409	30563473	-	30563456	30563473
chr1:31977625-31977689:-:NSC	chr1	31977625	31977689	-	31977676	31977689
chr1:31996857-31996912:-:NSC	chr1	31996857	31996912	-	31996857	31996879
chr1:33500129-33500176:-:NSC	chr1	33500129	33500176	-	33500129	33500146
chr1:34214492-34214567:-:NSC	chr1	34214492	34214567	-	34214548	34214567
chr1:35895972-35896007:+:NSC	chr1	35895972	35896007	+	35895993	35896007
chr1:35895972-35896007:+:NSC	chr1	35895972	35896007	+	35895993	35896007
chr1:35956779-35956833:-:NSC	chr1	35956779	35956833	-	35956779	35956797
chr1:37177304-37177345:-:NSC	chr1	37177304	37177345	-	37177329	37177345
chr1:37193471-37193553:+:NSC	chr1	37193471	37193553	+	37193471	37193488
chr1:37399762-37399813:+:NSC	chr1	37399762	37399813	+	37399762	37399778
chr1:37549693-37549737:-:ESC	chr1	37549693	37549737	-	37549693	37549710
chr1:37867390-37867439:+:NSC	chr1	37867390	37867439	+	37867424	37867439
chr1:39059396-39059479:-:NSC	chr1	39059396	39059479	-	39059462	39059479
chr1:41761482-41761519:+:ESC	chr1	41761482	41761519	+	41761482	41761498
chr1:42828036-42828073:-:NSC	chr1	42828036	42828073	-	42828059	42828073
chr1:42828036-42828073:-:NSC	chr1	42828036	42828073	-	42828059	42828073
chr1:43943102-43943174:+:NSC	chr1	43943102	43943174	+	43943158	43943174
chr1:50349467-50349522:+:NSC	chr1	50349467	50349522	+	50349505	50349522
chr1:50561666-50561729:+:ESC	chr1	50561666	50561729	+	50561666	50561685
chr1:51963103-51963166:-:NSC	chr1	51963103	51963166	-	51963144	51963166
chr1:54612107-54612144:+:ESC-NSC	chr1	54612107	54612144	+	54612127	54612144
chr1:65107338-65107393:-:ESC-NSC	chr1	65107338	65107393	-	65107338	65107357
chr1:65599628-65599658:+:NSC	chr1	65599628	65599658	+	65599645	65599658
chr1:65599628-65599658:+:NSC	chr1	65599628	65599658	+	65599645	65599658
chr1:86171711-86171765:+:NSC	chr1	86171711	86171765	+	86171711	86171730
chr1:99370014-99370073:+:NSC	chr1	99370014	99370073	+	99370056	99370073
chr1:109385555-109385613:-:ESC	chr1	109385555	109385613	-	109385555	109385571
chr1:110862626-110862711:+:NSC	chr1	110862626	110862711	+	110862626	110862644
chr1:112805924-112805967:-:ESC-NSC	chr1	112805924	112805967	-	112805950	112805967
chr1:112970234-112970289:-:ESC	chr1	112970234	112970289	-	112970273	112970289
chr1:145641086-145641129:+:ESC	chr1	145641086	145641129	+	145641114	145641129
chr1:148791040-148791105:+:NSC	chr1	148791040	148791105	+	148791088	148791105
chr1:150076030-150076079:-:NSC	chr1	150076030	150076079	-	150076030	150076047
chr1:153052500-153052560:-:NSC	chr1	153052500	153052560	-	153052545	153052560
chr1:153214804-153214874:+:ESC	chr1	153214804	153214874	+	153214804	153214820
chr1:154349823-154349899:+:NSC	chr1	154349823	154349899	+	154349823	154349843
chr1:158136402-158136482:-:NSC	chr1	158136402	158136482	-	158136402	158136423
chr1:162036709-162036748:-:NSC	chr1	162036709	162036748	-	162036709	162036725
chr1:165609519-165609624:+:NSC	chr1	165609519	165609624	+	165609519	165609534
chr1:174128731-174128783:+:NSC	chr1	174128731	174128783	+	174128766	174128783
chr1:175143131-175143179:-:NSC	chr1	175143131	175143179	-	175143162	175143179
chr1:178394451-178394494:-:NSC	chr1	178394451	178394494	-	178394478	178394494
chr1:181542267-181542329:-:ESC-NSC	chr1	181542267	181542329	-	181542267	181542284
chr1:188987768-188987852:+:ESC	chr1	188987768	188987852	+	188987836	188987852
chr1:194853520-194853564:+:NSC	chr1	194853520	194853564	+	194853548	194853564
chr1:200550484-200550541:+:ESC	chr1	200550484	200550541	+	200550522	200550541
chr1:202811219-202811264:-:ESC-NSC	chr1	202811219	202811264	-	202811248	202811264
chr1:204766775-204766819:-:NSC	chr1	204766775	204766819	-	204766775	204766794
chr1:207863421-207863467:-:ESC	chr1	207863421	207863467	-	207863448	207863467
chr1:213659104-213659142:+:NSC	chr1	213659104	213659142	+	213659104	213659122
chr1:217645791-217645857:-:ESC	chr1	217645791	217645857	-	217645839	217645857
chr1:220279096-220279130:-:NSC	chr1	220279096	220279130	-	220279096	220279112
chr1:225988486-225988535:+:NSC	chr1	225988486	225988535	+	225988519	225988535
chr1:227264451-227264526:+:NSC	chr1	227264451	227264526	+	227264508	227264526
chr1:228050094-228050149:-:NSC	chr1	228050094	228050149	-	228050094	228050116
chr1:230193730-230193801:+:ESC	chr1	230193730	230193801	+	230193784	230193801
chr1:230672190-230672240:+:NSC	chr1	230672190	230672240	+	230672227	230672240
chr1:241576542-241576605:+:NSC	chr1	241576542	241576605	+	241576589	241576605
chr1:243080353-243080429:-:ESC	chr1	243080353	243080429	-	243080407	243080429
chr1:243924678-243924718:+:NSC	chr1	243924678	243924718	+	243924701	243924718
chr1:245178717-245178774:+:ESC	chr1	245178717	245178774	+	245178758	245178774
chr2:2530477-2530528:+:ESC	chr2	2530477	2530528	+	2530509	2530528
chr2:4214863-4214917:+:NSC	chr2	4214863	4214917	+	4214863	4214885
chr2:6123411-6123485:-:ESC	chr2	6123411	6123485	-	6123411	6123430
chr2:6994335-6994412:-:NSC	chr2	6994335	6994412	-	6994394	6994412
chr2:7739931-7739994:-:NSC	chr2	7739931	7739994	-	7739978	7739994
chr2:9207209-9207268:-:NSC	chr2	9207209	9207268	-	9207209	9207226
chr2:10250200-10250237:-:NSC	chr2	10250200	10250237	-	10250200	10250215
chr2:11894519-11894552:-:NSC	chr2	11894519	11894552	-	11894519	11894535
chr2:13066172-13066244:+:ESC	chr2	13066172	13066244	+	13066172	13066190
chr2:13575007-13575070:+:NSC	chr2	13575007	13575070	+	13575056	13575070
chr2:16315797-16315840:+:NSC	chr2	16315797	16315840	+	16315797	16315814
chr2:20656843-20656889:-:NSC	chr2	20656843	20656889	-	20656871	20656889
chr2:21489119-21489187:+:NSC	chr2	21489119	21489187	+	21489168	21489187
chr2:22433665-22433707:+:NSC	chr2	22433665	22433707	+	22433690	22433707
chr2:23002471-23002544:+:NSC	chr2	23002471	23002544	+	23002522	23002544
chr2:26675101-26675156:-:ESC	chr2	26675101	26675156	-	26675101	26675118
chr2:28072749-28072811:+:ESC	chr2	28072749	28072811	+	28072794	28072811
chr2:31732866-31732916:-:ESC	chr2	31732866	31732916	-	31732898	31732916
chr2:47677073-47677123:+:NSC	chr2	47677073	47677123	+	47677073	47677092
chr2:60255031-60255077:+:ESC	chr2	60255031	60255077	+	60255059	60255077
chr2:60315487-60315531:+:ESC	chr2	60315487	60315531	+	60315513	60315531
chr2:69184328-69184385:+:NSC	chr2	69184328	69184385	+	69184364	69184385
chr2:70605702-70605743:+:NSC	chr2	70605702	70605743	+	70605702	70605716
chr2:70635627-70635700:+:NSC	chr2	70635627	70635700	+	70635627	70635643
chr2:70970879-70970954:+:NSC	chr2	70970879	70970954	+	70970879	70970896
chr2:75193970-75194033:-:NSC	chr2	75193970	75194033	-	75193970	75193985
chr2:79729937-79729982:-:NSC	chr2	79729937	79729982	-	79729966	79729982
chr2:85864234-85864314:+:ESC	chr2	85864234	85864314	+	85864292	85864314
chr2:88266809-88266855:+:ESC	chr2	88266809	88266855	+	88266809	88266824
chr2:88814214-88814259:+:ESC	chr2	88814214	88814259	+	88814214	88814230
chr2:89352155-89352194:+:ESC	chr2	89352155	89352194	+	89352181	89352194
chr2:100215871-100215909:+:NSC	chr2	100215871	100215909	+	100215871	100215888
chr2:101292351-101292425:+:NSC	chr2	101292351	101292425	+	101292409	101292425
chr2:109124387-109124465:-:NSC	chr2	109124387	109124465	-	109124387	109124405
chr2:109296468-109296502:-:ESC	chr2	109296468	109296502	-	109296468	109296483
chr2:109296468-109296502:-:ESC	chr2	109296468	109296502	-	109296468	109296483
chr2:109357766-109357845:-:NSC	chr2	109357766	109357845	-	109357826	109357845
chr2:110184836-110184897:-:NSC	chr2	110184836	110184897	-	110184881	110184897
chr2:112994387-112994436:+:NSC	chr2	112994387	112994436	+	112994421	112994436
chr2:120916408-120916465:+:NSC	chr2	120916408	120916465	+	120916408	120916424
chr2:122784197-122784263:+:NSC	chr2	122784197	122784263	+	122784197	122784214
chr2:127198248-127198325:+:NSC	chr2	127198248	127198325	+	127198309	127198325
chr2:132736052-132736119:-:ESC	chr2	132736052	132736119	-	132736052	132736068
chr2:132739589-132739653:+:NSC	chr2	132739589	132739653	+	132739589	132739613
chr2:132749752-132749806:-:NSC	chr2	132749752	132749806	-	132749752	132749770
chr2:132778725-132778806:+:NSC	chr2	132778725	132778806	+	132778725	132778745
chr2:137392985-137393047:+:ESC	chr2	137392985	137393047	+	137393032	137393047
chr2:149019082-149019156:-:NSC	chr2	149019082	149019156	-	149019082	149019100
chr2:154736452-154736493:+:NSC	chr2	154736452	154736493	+	154736476	154736493
chr2:168108481-168108540:+:NSC	chr2	168108481	168108540	+	168108525	168108540
chr2:177574403-177574435:+:ESC	chr2	177574403	177574435	+	177574421	177574435
chr2:177574403-177574435:+:ESC	chr2	177574403	177574435	+	177574421	177574435
chr2:198892894-198892945:-:ESC-NSC	chr2	198892894	198892945	-	198892925	198892945
chr2:207682965-207683031:-:ESC-NSC	chr2	207682965	207683031	-	207683010	207683031
chr2:208786794-208786848:+:ESC	chr2	208786794	208786848	+	208786794	208786818
chr2:212930748-212930812:+:NSC	chr2	212930748	212930812	+	212930748	212930763
chr2:215225582-215225646:-:NSC	chr2	215225582	215225646	-	215225631	215225646
chr2:220479476-220479519:-:NSC	chr2	220479476	220479519	-	220479476	220479496
chr2:231962827-231962867:-:ESC-NSC	chr2	231962827	231962867	-	231962827	231962844
chr2:233864947-233864986:-:ESC	chr2	233864947	233864986	-	233864972	233864986
chr2:234720123-234720162:+:ESC	chr2	234720123	234720162	+	234720148	234720162
chr2:234957345-234957398:-:ESC	chr2	234957345	234957398	-	234957381	234957398
chr2:236021326-236021396:+:ESC	chr2	236021326	236021396	+	236021378	236021396
chr2:236499736-236499815:+:ESC	chr2	236499736	236499815	+	236499736	236499753
chr2:237634924-237634971:+:ESC-NSC	chr2	237634924	237634971	+	237634955	237634971
chr2:239098174-239098242:+:NSC	chr2	239098174	239098242	+	239098223	239098242
chr2:239191594-239191654:+:NSC	chr2	239191594	239191654	+	239191637	239191654
chr2:239892105-239892168:+:NSC	chr2	239892105	239892168	+	239892105	239892125
chr2:240052855-240052894:+:NSC	chr2	240052855	240052894	+	240052855	240052868
chr2:242451066-242451122:-:NSC	chr2	242451066	242451122	-	242451066	242451087
chr2:242454922-242454957:-:NSC	chr2	242454922	242454957	-	242454922	242454937
chr2:242741835-242741873:-:ESC-NSC	chr2	242741835	242741873	-	242741835	242741852
chr3:2381092-2381142:+:ESC	chr3	2381092	2381142	+	2381092	2381109
chr3:10564773-10564809:+:NSC	chr3	10564773	10564809	+	10564773	10564789
chr3:10564773-10564809:+:NSC	chr3	10564773	10564809	+	10564773	10564789
chr3:10598015-10598055:+:ESC-NSC	chr3	10598015	10598055	+	10598015	10598031
chr3:12892112-12892154:-:ESC-NSC	chr3	12892112	12892154	-	12892112	12892128
chr3:13073765-13073847:+:NSC	chr3	13073765	13073847	+	13073829	13073847
chr3:15512759-15512808:-:NSC	chr3	15512759	15512808	-	15512789	15512808
chr3:17186873-17186913:+:ESC	chr3	17186873	17186913	+	17186873	17186888
chr3:17186873-17186912:+:ESC	chr3	17186873	17186912	+	17186873	17186888
chr3:37880090-37880122:+:ESC-NSC	chr3	37880090	37880122	+	37880108	37880122
chr3:43965941-43965978:+:NSC	chr3	43965941	43965978	+	43965962	43965978
chr3:45862637-45862674:-:ESC	chr3	45862637	45862674	-	45862637	45862652
chr3:45862638-45862673:-:ESC	chr3	45862638	45862673	-	45862638	45862652
chr3:49286568-49286614:+:ESC	chr3	49286568	49286614	+	49286596	49286614
chr3:49989929-49989978:+:NSC	chr3	49989929	49989978	+	49989929	49989947
chr3:55616483-55616522:+:NSC	chr3	55616483	55616522	+	55616483	55616500
chr3:60357080-60357146:+:NSC	chr3	60357080	60357146	+	60357130	60357146
chr3:66019489-66019529:-:ESC-NSC	chr3	66019489	66019529	-	66019489	66019504
chr3:66538411-66538475:-:NSC	chr3	66538411	66538475	-	66538411	66538425
chr3:67358589-67358632:+:NSC	chr3	67358589	67358632	+	67358615	67358632
chr3:73026930-73026999:+:NSC	chr3	73026930	73026999	+	73026930	73026946
chr3:75870132-75870195:+:NSC	chr3	75870132	75870195	+	75870132	75870149
chr3:98674698-98674758:+:ESC	chr3	98674698	98674758	+	98674744	98674758
chr3:102081697-102081780:+:NSC	chr3	102081697	102081780	+	102081697	102081717
chr3:103790754-103790794:+:ESC	chr3	103790754	103790794	+	103790780	103790794
chr3:112771574-112771641:+:NSC	chr3	112771574	112771641	+	112771621	112771641
chr3:115086826-115086882:+:NSC	chr3	115086826	115086882	+	115086866	115086882
chr3:119695764-119695836:+:ESC-NSC	chr3	119695764	119695836	+	119695764	119695781
chr3:121609980-121610039:-:NSC	chr3	121609980	121610039	-	121610022	121610039
chr3:122896523-122896580:+:ESC	chr3	122896523	122896580	+	122896564	122896580
chr3:124485072-124485150:-:ESC	chr3	124485072	124485150	-	124485130	124485150
chr3:128467191-128467249:-:ESC	chr3	128467191	128467249	-	128467232	128467249
chr3:128675576-128675628:+:NSC	chr3	128675576	128675628	+	128675576	128675591
chr3:129226637-129226684:+:NSC	chr3	129226637	129226684	+	129226664	129226684
chr3:130542556-130542589:-:ESC	chr3	130542556	130542589	-	130542556	130542571
chr3:130542556-130542589:-:ESC	chr3	130542556	130542589	-	130542556	130542571
chr3:140309912-140309974:+:ESC-NSC	chr3	140309912	140309974	+	140309958	140309974
chr3:148060437-148060471:+:NSC	chr3	148060437	148060471	+	148060458	148060471
chr3:155545998-155546074:+:NSC	chr3	155545998	155546074	+	155545998	155546013
chr3:185861241-185861280:-:NSC	chr3	185861241	185861280	-	185861265	185861280
chr3:188243835-188243894:+:NSC	chr3	188243835	188243894	+	188243877	188243894
chr3:195351124-195351179:-:NSC	chr3	195351124	195351179	-	195351124	195351143
chr3:197106261-197106312:+:ESC	chr3	197106261	197106312	+	197106261	197106279
chr3:198391269-198391349:+:ESC	chr3	198391269	198391349	+	198391328	198391349
chr4:1738376-1738448:+:ESC	chr4	1738376	1738448	+	1738432	1738448
chr4:2293894-2293965:-:NSC	chr4	2293894	2293965	-	2293946	2293965
chr4:3485722-3485776:+:NSC	chr4	3485722	3485776	+	3485756	3485776
chr4:3572511-3572557:+:NSC	chr4	3572511	3572557	+	3572511	3572529
chr4:3770196-3770233:-:NSC	chr4	3770196	3770233	-	3770196	3770212
chr4:7512666-7512736:+:ESC	chr4	7512666	7512736	+	7512719	7512736
chr4:7557968-7558031:+:ESC	chr4	7557968	7558031	+	7557968	7557985
chr4:8214328-8214397:+:NSC	chr4	8214328	8214397	+	8214381	8214397
chr4:8779070-8779150:+:ESC	chr4	8779070	8779150	+	8779070	8779085
chr4:9570583-9570662:+:ESC	chr4	9570583	9570662	+	9570583	9570605
chr4:23477266-23477306:-:NSC	chr4	23477266	23477306	-	23477266	23477281
chr4:25295115-25295177:+:NSC	chr4	25295115	25295177	+	25295160	25295177
chr4:25689487-25689554:-:NSC	chr4	25689487	25689554	-	25689536	25689554
chr4:28430312-28430380:+:ESC	chr4	28430312	28430380	+	28430312	28430329
chr4:38449683-38449738:+:ESC	chr4	38449683	38449738	+	38449721	38449738
chr4:47287856-47287920:-:NSC	chr4	47287856	47287920	-	47287856	47287871
chr4:52502278-52502339:+:NSC	chr4	52502278	52502339	+	52502319	52502339
chr4:56304859-56304936:+:ESC	chr4	56304859	56304936	+	56304920	56304936
chr4:57813652-57813721:-:NSC	chr4	57813652	57813721	-	57813652	57813669
chr4:58402054-58402103:+:NSC	chr4	58402054	58402103	+	58402090	58402103
chr4:93842168-93842218:+:NSC	chr4	93842168	93842218	+	93842194	93842218
chr4:94411572-94411634:+:NSC	chr4	94411572	94411634	+	94411572	94411591
chr4:99749265-99749328:-:NSC	chr4	99749265	99749328	-	99749310	99749328
chr4:111213313-111213357:+:NSC	chr4	111213313	111213357	+	111213339	111213357
chr4:115520806-115520841:-:NSC	chr4	115520806	115520841	-	115520806	115520821
chr4:115520810-115520845:+:NSC	chr4	115520810	115520845	+	115520831	115520845
chr4:135792675-135792732:+:ESC	chr4	135792675	135792732	+	135792675	135792691
chr4:143411285-143411365:-:NSC	chr4	143411285	143411365	-	143411285	143411299
chr4:147233504-147233552:-:NSC	chr4	147233504	147233552	-	147233504	147233520
chr4:148379713-148379773:-:ESC-NSC	chr4	148379713	148379773	-	148379755	148379773
chr4:154187047-154187115:-:ESC	chr4	154187047	154187115	-	154187047	154187066
chr4:160738475-160738548:-:ESC	chr4	160738475	160738548	-	160738475	160738496
chr4:163090712-163090755:+:ESC	chr4	163090712	163090755	+	163090712	163090730
chr4:167322204-167322263:-:NSC	chr4	167322204	167322263	-	167322245	167322263
chr4:173983055-173983117:+:ESC	chr4	173983055	173983117	+	173983099	173983117
chr4:175581532-175581581:+:NSC	chr4	175581532	175581581	+	175581532	175581548
chr4:177608767-177608811:+:NSC	chr4	177608767	177608811	+	177608767	177608780
chr5:557490-557576:+:ESC	chr5	557490	557576	+	557559	557576
chr5:632827-632873:+:NSC	chr5	632827	632873	+	632827	632842
chr5:1761909-1761972:-:NSC	chr5	1761909	1761972	-	1761952	1761972
chr5:2693720-2693761:-:NSC	chr5	2693720	2693761	-	2693747	2693761
chr5:3418747-3418794:+:ESC	chr5	3418747	3418794	+	3418747	3418763
chr5:4426291-4426352:+:ESC	chr5	4426291	4426352	+	4426334	4426352
chr5:6880975-6881023:-:ESC	chr5	6880975	6881023	-	6880975	6880992
chr5:9153191-9153276:-:ESC	chr5	9153191	9153276	-	9153255	9153276
chr5:11008448-11008483:-:NSC	chr5	11008448	11008483	-	11008448	11008463
chr5:25912431-25912505:-:NSC	chr5	25912431	25912505	-	25912487	25912505
chr5:31971974-31972011:-:NSC	chr5	31971974	31972011	-	31971974	31971989
chr5:33876801-33876848:-:NSC	chr5	33876801	33876848	-	33876833	33876848
chr5:52182991-52183044:-:ESC-NSC	chr5	52182991	52183044	-	52183029	52183044
chr5:82321428-82321479:-:NSC	chr5	82321428	82321479	-	82321428	82321441
chr5:86446461-86446516:-:ESC-NSC	chr5	86446461	86446516	-	86446496	86446516
chr5:87572421-87572489:-:NSC	chr5	87572421	87572489	-	87572473	87572489
chr5:88220966-88221009:+:ESC	chr5	88220966	88221009	+	88220966	88220982
chr5:92828340-92828381:+:ESC	chr5	92828340	92828381	+	92828362	92828381
chr5:96036612-96036657:-:NSC	chr5	96036612	96036657	-	96036612	96036630
chr5:98163993-98164058:+:NSC	chr5	98163993	98164058	+	98163993	98164009
chr5:99665865-99665915:+:ESC-NSC	chr5	99665865	99665915	+	99665892	99665915
chr5:106753388-106753426:-:NSC	chr5	106753388	106753426	-	106753388	106753405
chr5:108931820-108931857:-:ESC	chr5	108931820	108931857	-	108931841	108931857
chr5:114676511-114676554:+:ESC	chr5	114676511	114676554	+	114676538	114676554
chr5:114676511-114676554:+:ESC	chr5	114676511	114676554	+	114676538	114676554
chr5:120822846-120822909:+:NSC	chr5	120822846	120822909	+	120822893	120822909
chr5:121807117-121807177:-:ESC-NSC	chr5	121807117	121807177	-	121807161	121807177
chr5:126340412-126340459:-:ESC	chr5	126340412	126340459	-	126340443	126340459
chr5:127627965-127628007:+:ESC-NSC	chr5	127627965	127628007	+	127627990	127628007
chr5:127627965-127628007:+:ESC-NSC	chr5	127627965	127628007	+	127627990	127628007
chr5:128495686-128495715:+:ESC	chr5	128495686	128495715	+	128495702	128495715
chr5:128495686-128495715:+:ESC	chr5	128495686	128495715	+	128495702	128495715
chr5:131598290-131598356:-:ESC	chr5	131598290	131598356	-	131598290	131598306
chr5:134389972-134390010:+:ESC	chr5	134389972	134390010	+	134389972	134389986
chr5:134543028-134543089:-:ESC	chr5	134543028	134543089	-	134543073	134543089
chr5:141143885-141143973:+:NSC	chr5	141143885	141143973	+	141143957	141143973
chr5:149759998-149760033:+:ESC	chr5	149759998	149760033	+	149760019	149760033
chr5:165633529-165633574:-:NSC	chr5	165633529	165633574	-	165633529	165633546
chr5:167684767-167684814:-:NSC	chr5	167684767	167684814	-	167684797	167684814
chr5:168026301-168026364:+:NSC	chr5	168026301	168026364	+	168026301	168026320
chr5:168211475-168211549:-:ESC	chr5	168211475	168211549	-	168211533	168211549
chr5:168349043-168349101:+:NSC	chr5	168349043	168349101	+	168349043	168349062
chr5:171810632-171810674:+:ESC	chr5	171810632	171810674	+	171810656	171810674
chr5:173050824-173050859:-:NSC	chr5	173050824	173050859	-	173050824	173050837
chr5:173050824-173050859:-:NSC	chr5	173050824	173050859	-	173050824	173050837
chr5:174364768-174364816:+:NSC	chr5	174364768	174364816	+	174364768	174364785
chr5:175054447-175054493:-:ESC	chr5	175054447	175054493	-	175054447	175054460
chr5:175989055-175989096:-:NSC	chr5	175989055	175989096	-	175989055	175989072
chr5:177340129-177340187:+:ESC-NSC	chr5	177340129	177340187	+	177340170	177340187
chr5:180461529-180461594:+:ESC	chr5	180461529	180461594	+	180461529	180461550
chr6:11740463-11740507:+:NSC	chr6	11740463	11740507	+	11740494	11740507
chr6:11742849-11742893:+:NSC	chr6	11742849	11742893	+	11742880	11742893
chr6:18442252-18442345:+:NSC	chr6	18442252	18442345	+	18442326	18442345
chr6:19420008-19420058:+:ESC	chr6	19420008	19420058	+	19420043	19420058
chr6:19420021-19420058:+:ESC	chr6	19420021	19420058	+	19420043	19420058
chr6:20083153-20083195:+:ESC	chr6	20083153	20083195	+	20083153	20083171
chr6:21877910-21877948:+:ESC-NSC	chr6	21877910	21877948	+	21877910	21877926
chr6:22673684-22673749:-:ESC	chr6	22673684	22673749	-	22673735	22673749
chr6:33497708-33497762:+:ESC-NSC	chr6	33497708	33497762	+	33497748	33497762
chr6:40987060-40987117:+:NSC	chr6	40987060	40987117	+	40987099	40987117
chr6:41983154-41983188:-:NSC	chr6	41983154	41983188	-	41983154	41983167
chr6:42956026-42956081:+:NSC	chr6	42956026	42956081	+	42956065	42956081
chr6:43699979-43700033:-:NSC	chr6	43699979	43700033	-	43699979	43699996
chr6:45957889-45957923:-:ESC	chr6	45957889	45957923	-	45957889	45957904
chr6:47902654-47902694:+:ESC	chr6	47902654	47902694	+	47902679	47902694
chr6:50429447-50429502:+:NSC	chr6	50429447	50429502	+	50429485	50429502
chr6:64706095-64706138:-:ESC-NSC	chr6	64706095	64706138	-	64706121	64706138
chr6:73562916-73563001:-:ESC	chr6	73562916	73563001	-	73562916	73562935
chr6:73657318-73657365:-:ESC	chr6	73657318	73657365	-	73657318	73657336
chr6:73734140-73734186:-:ESC	chr6	73734140	73734186	-	73734140	73734157
chr6:74007673-74007711:-:ESC	chr6	74007673	74007711	-	74007673	74007688
chr6:75211867-75211929:+:ESC	chr6	75211867	75211929	+	75211867	75211883
chr6:82681528-82681602:-:ESC	chr6	82681528	82681602	-	82681586	82681602
chr6:85533894-85533944:-:NSC	chr6	85533894	85533944	-	85533894	85533912
chr6:85676325-85676368:+:ESC-NSC	chr6	85676325	85676368	+	85676325	85676341
chr6:90961679-90961728:-:NSC	chr6	90961679	90961728	-	90961679	90961694
chr6:91244968-91245043:+:NSC	chr6	91244968	91245043	+	91244968	91244983
chr6:110990177-110990231:-:NSC	chr6	110990177	110990231	-	110990177	110990194
chr6:125461404-125461448:-:ESC	chr6	125461404	125461448	-	125461432	125461448
chr6:130728241-130728282:+:ESC	chr6	130728241	130728282	+	130728241	130728256
chr6:138526529-138526608:+:ESC	chr6	138526529	138526608	+	138526589	138526608
chr6:139104659-139104731:+:ESC	chr6	139104659	139104731	+	139104659	139104677
chr6:139730817-139730882:-:NSC	chr6	139730817	139730882	-	139730866	139730882
chr6:139897256-139897314:+:NSC	chr6	139897256	139897314	+	139897256	139897272
chr6:150577571-150577616:-:ESC-NSC	chr6	150577571	150577616	-	150577571	150577586
chr6:159819311-159819389:-:NSC	chr6	159819311	159819389	-	159819376	159819389
chr6:162113459-162113523:-:ESC	chr6	162113459	162113523	-	162113459	162113475
chr6:165911528-165911593:+:NSC	chr6	165911528	165911593	+	165911528	165911546
chr6:167617092-167617150:-:NSC	chr6	167617092	167617150	-	167617133	167617150
chr7:666996-667055:-:ESC-NSC	chr7	666996	667055	-	666996	667014
chr7:904354-904419:+:NSC	chr7	904354	904419	+	904402	904419
chr7:1251121-1251210:-:NSC	chr7	1251121	1251210	-	1251121	1251137
chr7:2480981-2481059:-:ESC	chr7	2480981	2481059	-	2480981	2480998
chr7:5280394-5280435:+:NSC	chr7	5280394	5280435	+	5280421	5280435
chr7:8606706-8606756:+:ESC-NSC	chr7	8606706	8606756	+	8606741	8606756
chr7:8787525-8787605:-:ESC-NSC	chr7	8787525	8787605	-	8787525	8787542
chr7:9621278-9621321:+:NSC	chr7	9621278	9621321	+	9621304	9621321
chr7:9621278-9621321:+:NSC	chr7	9621278	9621321	+	9621304	9621321
chr7:13141038-13141096:+:ESC-NSC	chr7	13141038	13141096	+	13141038	13141053
chr7:22528188-22528244:+:ESC	chr7	22528188	22528244	+	22528188	22528205
chr7:27125298-27125344:-:ESC	chr7	27125298	27125344	-	27125298	27125319
chr7:29025516-29025567:+:NSC	chr7	29025516	29025567	+	29025549	29025567
chr7:30279723-30279785:+:ESC-NSC	chr7	30279723	30279785	+	30279768	30279785
chr7:30876396-30876461:-:NSC	chr7	30876396	30876461	-	30876441	30876461
chr7:35077661-35077721:+:ESC	chr7	35077661	35077721	+	35077661	35077677
chr7:39527578-39527638:-:NSC	chr7	39527578	39527638	-	39527623	39527638
chr7:39751406-39751442:+:ESC	chr7	39751406	39751442	+	39751406	39751422
chr7:39751406-39751442:+:ESC	chr7	39751406	39751442	+	39751406	39751422
chr7:45462040-45462101:+:ESC-NSC	chr7	45462040	45462101	+	45462087	45462101
chr7:46167265-46167308:+:ESC	chr7	46167265	46167308	+	46167265	46167282
chr7:51183697-51183734:+:ESC	chr7	51183697	51183734	+	51183697	51183713
chr7:51183697-51183734:+:ESC	chr7	51183697	51183734	+	51183697	51183713
chr7:52217206-52217266:+:NSC	chr7	52217206	52217266	+	52217251	52217266
chr7:62718914-62718973:+:NSC	chr7	62718914	62718973	+	62718914	62718930
chr7:70371944-70372007:+:ESC	chr7	70371944	70372007	+	70371987	70372007
chr7:72763594-72763654:+:ESC-NSC	chr7	72763594	72763654	+	72763594	72763611
chr7:76363600-76363679:-:ESC-NSC	chr7	76363600	76363679	-	76363665	76363679
chr7:84471972-84472029:-:ESC	chr7	84471972	84472029	-	84472012	84472029
chr7:99914985-99915052:-:NSC	chr7	99914985	99915052	-	99914985	99915002
chr7:100289787-100289832:-:ESC	chr7	100289787	100289832	-	100289787	100289806
chr7:101723100-101723164:+:NSC	chr7	101723100	101723164	+	101723100	101723117
chr7:103049108-103049165:-:NSC	chr7	103049108	103049165	-	103049144	103049165
chr7:111096620-111096679:+:ESC	chr7	111096620	111096679	+	111096661	111096679
chr7:115658323-115658379:+:NSC	chr7	115658323	115658379	+	115658323	115658347
chr7:118171176-118171210:+:NSC	chr7	118171176	118171210	+	118171196	118171210
chr7:118171176-118171210:+:NSC	chr7	118171176	118171210	+	118171196	118171210
chr7:121737488-121737544:+:ESC	chr7	121737488	121737544	+	121737524	121737544
chr7:122022058-122022111:+:NSC	chr7	122022058	122022111	+	122022058	122022072
chr7:122283278-122283327:+:ESC-NSC	chr7	122283278	122283327	+	122283304	122283327
chr7:127750507-127750570:-:ESC-NSC	chr7	127750507	127750570	-	127750507	127750522
chr7:128418562-128418617:-:ESC	chr7	128418562	128418617	-	128418562	128418578
chr7:131150823-131150860:+:ESC	chr7	131150823	131150860	+	131150844	131150860
chr7:131155800-131155836:-:NSC	chr7	131155800	131155836	-	131155800	131155819
chr7:131633831-131633884:+:ESC-NSC	chr7	131633831	131633884	+	131633869	131633884
chr7:138393728-138393813:+:NSC	chr7	138393728	138393813	+	138393728	138393750
chr7:141890854-141890917:-:NSC	chr7	141890854	141890917	-	141890854	141890872
chr7:149140405-149140453:-:NSC	chr7	149140405	149140453	-	149140405	149140423
chr7:151229246-151229315:-:NSC	chr7	151229246	151229315	-	151229298	151229315
chr7:153253539-153253594:+:NSC	chr7	153253539	153253594	+	153253539	153253556
chr7:154073218-154073272:-:NSC	chr7	154073218	154073272	-	154073218	154073236
chr7:158508197-158508235:+:NSC	chr7	158508197	158508235	+	158508217	158508235
chr8:3440222-3440256:-:NSC	chr8	3440222	3440256	-	3440222	3440237
chr8:8125790-8125856:-:NSC	chr8	8125790	8125856	-	8125839	8125856
chr8:10247022-10247076:+:ESC	chr8	10247022	10247076	+	10247062	10247076
chr8:10561909-10561981:+:NSC	chr8	10561909	10561981	+	10561909	10561926
chr8:11865504-11865570:+:NSC	chr8	11865504	11865570	+	11865552	11865570
chr8:12086678-12086744:+:NSC	chr8	12086678	12086744	+	12086678	12086695
chr8:12335913-12335979:+:NSC	chr8	12335913	12335979	+	12335913	12335930
chr8:17985249-17985289:-:ESC	chr8	17985249	17985289	-	17985249	17985266
chr8:21358086-21358124:-:NSC	chr8	21358086	21358124	-	21358086	21358103
chr8:21771167-21771224:+:ESC	chr8	21771167	21771224	+	21771167	21771183
chr8:21985734-21985818:-:ESC	chr8	21985734	21985818	-	21985802	21985818
chr8:23647324-23647371:+:NSC	chr8	23647324	23647371	+	23647355	23647371
chr8:27799484-27799541:-:ESC	chr8	27799484	27799541	-	27799523	27799541
chr8:28418561-28418607:-:ESC-NSC	chr8	28418561	28418607	-	28418561	28418577
chr8:35563544-35563599:-:ESC	chr8	35563544	35563599	-	35563544	35563564
chr8:41239384-41239419:+:NSC	chr8	41239384	41239419	+	41239403	41239419
chr8:58376208-58376256:+:NSC	chr8	58376208	58376256	+	58376239	58376256
chr8:66343146-66343249:+:NSC	chr8	66343146	66343249	+	66343146	66343162
chr8:72608552-72608586:+:NSC	chr8	72608552	72608586	+	72608569	72608586
chr8:90843213-90843258:-:ESC	chr8	90843213	90843258	-	90843242	90843258
chr8:101552228-101552280:+:NSC	chr8	101552228	101552280	+	101552264	101552280
chr8:102789509-102789571:+:NSC	chr8	102789509	102789571	+	102789549	102789571
chr8:128018705-128018751:-:ESC	chr8	128018705	128018751	-	128018705	128018720
chr8:134331938-134332001:+:NSC	chr8	134331938	134332001	+	134331938	134331954
chr8:140103358-140103428:-:ESC	chr8	140103358	140103428	-	140103412	140103428
chr8:142305664-142305714:+:ESC	chr8	142305664	142305714	+	142305697	142305714
chr8:143385732-143385800:-:NSC	chr8	143385732	143385800	-	143385732	143385746
chr9:3546465-3546539:+:ESC	chr9	3546465	3546539	+	3546465	3546485
chr9:21661659-21661720:-:NSC	chr9	21661659	21661720	-	21661659	21661674
chr9:22383929-22383970:+:ESC	chr9	22383929	22383970	+	22383954	22383970
chr9:22436720-22436777:+:NSC	chr9	22436720	22436777	+	22436720	22436736
chr9:33115907-33115977:-:ESC	chr9	33115907	33115977	-	33115963	33115977
chr9:33406509-33406560:+:ESC-NSC	chr9	33406509	33406560	+	33406544	33406560
chr9:36823154-36823204:+:NSC	chr9	36823154	36823204	+	36823187	36823204
chr9:36858221-36858265:+:NSC	chr9	36858221	36858265	+	36858221	36858238
chr9:72628934-72628985:+:ESC	chr9	72628934	72628985	+	72628934	72628950
chr9:73349348-73349399:+:NSC	chr9	73349348	73349399	+	73349383	73349399
chr9:81964848-81964886:-:ESC	chr9	81964848	81964886	-	81964870	81964886
chr9:90550580-90550629:-:NSC	chr9	90550580	90550629	-	90550611	90550629
chr9:90550611-90550660:-:NSC	chr9	90550611	90550660	-	90550611	90550629
chr9:91825552-91825626:-:NSC	chr9	91825552	91825626	-	91825552	91825570
chr9:93502467-93502530:-:NSC	chr9	93502467	93502530	-	93502467	93502488
chr9:95621470-95621516:+:NSC	chr9	95621470	95621516	+	95621470	95621485
chr9:110563813-110563860:-:NSC	chr9	110563813	110563860	-	110563844	110563860
chr9:112250996-112251053:+:ESC	chr9	112250996	112251053	+	112250996	112251012
chr9:115359725-115359792:-:NSC	chr9	115359725	115359792	-	115359725	115359745
chr9:118121114-118121182:-:NSC	chr9	118121114	118121182	-	118121165	118121182
chr9:123671954-123672027:-:ESC	chr9	123671954	123672027	-	123671954	123671971
chr9:124179262-124179339:-:NSC	chr9	124179262	124179339	-	124179321	124179339
chr9:129206177-129206250:-:NSC	chr9	129206177	129206250	-	129206234	129206250
chr9:129542229-129542288:-:NSC	chr9	129542229	129542288	-	129542265	129542288
chr9:130047055-130047115:-:NSC	chr9	130047055	130047115	-	130047055	130047076
chr9:132007407-132007472:+:ESC	chr9	132007407	132007472	+	132007457	132007472
chr9:132756044-132756119:+:NSC	chr9	132756044	132756119	+	132756044	132756063
chr9:133200156-133200231:-:ESC	chr9	133200156	133200231	-	133200156	133200172
chr9:136673351-136673395:+:NSC	chr9	136673351	136673395	+	136673351	136673367
chr9:137405331-137405378:+:NSC	chr9	137405331	137405378	+	137405357	137405378
chr9:137534911-137534953:+:NSC	chr9	137534911	137534953	+	137534936	137534953
chr9:138147495-138147536:-:ESC	chr9	138147495	138147536	-	138147495	138147512
chr9:138147495-138147536:-:ESC	chr9	138147495	138147536	-	138147495	138147512
chr9:138772142-138772201:-:NSC	chr9	138772142	138772201	-	138772185	138772201
chr9:138845241-138845287:+:ESC	chr9	138845241	138845287	+	138845270	138845287
chr9:139287855-139287898:+:NSC	chr9	139287855	139287898	+	139287855	139287871
chr10:2624002-2624053:-:NSC	chr10	2624002	2624053	-	2624036	2624053
chr10:2990181-2990221:-:NSC	chr10	2990181	2990221	-	2990203	2990221
chr10:2990181-2990221:-:NSC	chr10	2990181	2990221	-	2990203	2990221
chr10:5843505-5843539:+:NSC	chr10	5843505	5843539	+	5843505	5843521
chr10:5843505-5843539:+:NSC	chr10	5843505	5843539	+	5843505	5843521
chr10:12421764-12421834:-:NSC	chr10	12421764	12421834	-	12421764	12421781
chr10:14465213-14465272:-:NSC	chr10	14465213	14465272	-	14465213	14465230
chr10:15263614-15263659:+:NSC	chr10	15263614	15263659	+	15263614	15263629
chr10:17439448-17439523:+:ESC	chr10	17439448	17439523	+	17439503	17439523
chr10:29224313-29224357:+:ESC	chr10	29224313	29224357	+	29224340	29224357
chr10:34958370-34958409:+:ESC	chr10	34958370	34958409	+	34958391	34958409
chr10:49863571-49863628:-:ESC	chr10	49863571	49863628	-	49863611	49863628
chr10:65370132-65370194:+:ESC-NSC	chr10	65370132	65370194	+	65370179	65370194
chr10:71283202-71283246:+:NSC	chr10	71283202	71283246	+	71283202	71283219
chr10:73138682-73138740:-:NSC	chr10	73138682	73138740	-	73138682	73138695
chr10:75317060-75317107:+:ESC	chr10	75317060	75317107	+	75317088	75317107
chr10:76252151-76252211:-:NSC	chr10	76252151	76252211	-	76252151	76252166
chr10:80501897-80501958:+:ESC	chr10	80501897	80501958	+	80501940	80501958
chr10:80953446-80953492:+:NSC	chr10	80953446	80953492	+	80953446	80953462
chr10:88767781-88767840:+:ESC	chr10	88767781	88767840	+	88767822	88767840
chr10:88767802-88767840:+:ESC	chr10	88767802	88767840	+	88767822	88767840
chr10:100167151-100167224:+:NSC	chr10	100167151	100167224	+	100167151	100167169
chr10:102967613-102967654:-:ESC	chr10	102967613	102967654	-	102967613	102967628
chr10:103005658-103005702:-:NSC	chr10	103005658	103005702	-	103005658	103005675
chr10:104102853-104102899:-:NSC	chr10	104102853	104102899	-	104102882	104102899
chr10:106294971-106295037:+:ESC-NSC	chr10	106294971	106295037	+	106295022	106295037
chr10:108395536-108395610:-:ESC	chr10	108395536	108395610	-	108395595	108395610
chr10:112127732-112127786:+:ESC	chr10	112127732	112127786	+	112127732	112127750
chr10:114383930-114383994:+:NSC	chr10	114383930	114383994	+	114383930	114383947
chr10:121249169-121249209:+:NSC	chr10	121249169	121249209	+	121249193	121249209
chr10:124113383-124113421:+:ESC	chr10	124113383	124113421	+	124113405	124113421
chr10:126413721-126413781:-:ESC	chr10	126413721	126413781	-	126413721	126413737
chr10:126711352-126711417:-:NSC	chr10	126711352	126711417	-	126711402	126711417
chr10:131531562-131531617:-:NSC	chr10	131531562	131531617	-	131531602	131531617
chr10:132180630-132180686:+:NSC	chr10	132180630	132180686	+	132180630	132180652
chr10:132180672-132180726:+:NSC	chr10	132180672	132180726	+	132180672	132180694
chr10:132650850-132650910:-:ESC-NSC	chr10	132650850	132650910	-	132650886	132650910
chr10:133258431-133258499:+:ESC	chr10	133258431	133258499	+	133258484	133258499
chr10:133793510-133793571:-:NSC	chr10	133793510	133793571	-	133793510	133793528
chr10:133830696-133830774:-:ESC	chr10	133830696	133830774	-	133830696	133830714
chr10:134931484-134931549:+:ESC	chr10	134931484	134931549	+	134931527	134931549
chr11:1735947-1736009:-:ESC-NSC	chr11	1735947	1736009	-	1735991	1736009
chr11:1837279-1837331:-:NSC	chr11	1837279	1837331	-	1837310	1837331
chr11:1837310-1837376:-:NSC	chr11	1837310	1837376	-	1837310	1837331
chr11:1916085-1916138:+:ESC	chr11	1916085	1916138	+	1916122	1916138
chr11:2415400-2415450:+:ESC	chr11	2415400	2415450	+	2415434	2415450
chr11:2968967-2969025:-:NSC	chr11	2968967	2969025	-	2968967	2968981
chr11:11634783-11634834:-:NSC	chr11	11634783	11634834	-	11634783	11634800
chr11:11718220-11718271:-:NSC	chr11	11718220	11718271	-	11718220	11718238
chr11:13716600-13716645:-:ESC-NSC	chr11	13716600	13716645	-	13716630	13716645
chr11:15083957-15084012:+:ESC	chr11	15083957	15084012	+	15083957	15083972
chr11:15312537-15312579:+:ESC	chr11	15312537	15312579	+	15312537	15312552
chr11:19720919-19720953:+:NSC	chr11	19720919	19720953	+	19720937	19720953
chr11:32375746-32375784:+:ESC	chr11	32375746	32375784	+	32375746	32375762
chr11:35496498-35496548:+:ESC	chr11	35496498	35496548	+	35496532	35496548
chr11:44904680-44904742:+:ESC	chr11	44904680	44904742	+	44904680	44904697
chr11:46121248-46121309:-:NSC	chr11	46121248	46121309	-	46121293	46121309
chr11:47371828-47371887:+:ESC-NSC	chr11	47371828	47371887	+	47371828	47371845
chr11:59902618-59902660:-:NSC	chr11	59902618	59902660	-	59902618	59902634
chr11:61033875-61033920:+:ESC-NSC	chr11	61033875	61033920	+	61033875	61033892
chr11:64142199-64142271:-:NSC	chr11	64142199	64142271	-	64142252	64142271
chr11:68339942-68340002:-:ESC	chr11	68339942	68340002	-	68339983	68340002
chr11:72701833-72701901:-:ESC	chr11	72701833	72701901	-	72701833	72701851
chr11:72789451-72789500:+:ESC	chr11	72789451	72789500	+	72789485	72789500
chr11:73164880-73164951:-:ESC	chr11	73164880	73164951	-	73164880	73164897
chr11:76013780-76013826:-:NSC	chr11	76013780	76013826	-	76013811	76013826
chr11:78826413-78826476:+:ESC	chr11	78826413	78826476	+	78826460	78826476
chr11:81279440-81279515:-:NSC	chr11	81279440	81279515	-	81279440	81279457
chr11:81997163-81997213:+:ESC	chr11	81997163	81997213	+	81997198	81997213
chr11:91654999-91655034:+:NSC	chr11	91654999	91655034	+	91655019	91655034
chr11:93427926-93427993:-:ESC-NSC	chr11	93427926	93427993	-	93427976	93427993
chr11:111892102-111892146:-:NSC	chr11	111892102	111892146	-	111892129	111892146
chr11:112825964-112826009:-:NSC	chr11	112825964	112826009	-	112825990	112826009
chr11:112847579-112847615:-:NSC	chr11	112847579	112847615	-	112847579	112847595
chr11:113376904-113376941:-:ESC	chr11	113376904	113376941	-	113376904	113376922
chr11:113376904-113376941:-:ESC	chr11	113376904	113376941	-	113376904	113376922
chr11:116977193-116977273:-:NSC	chr11	116977193	116977273	-	116977255	116977273
chr11:119271517-119271555:+:NSC	chr11	119271517	119271555	+	119271517	119271531
chr11:120437113-120437185:+:ESC	chr11	120437113	120437185	+	120437113	120437132
chr11:122077388-122077452:+:ESC	chr11	122077388	122077452	+	122077388	122077403
chr11:125767929-125767996:+:NSC	chr11	125767929	125767996	+	125767976	125767996
chr11:125978451-125978523:+:NSC	chr11	125978451	125978523	+	125978451	125978469
chr11:130957005-130957058:-:NSC	chr11	130957005	130957058	-	130957042	130957058
chr11:132430398-132430471:-:NSC	chr11	132430398	132430471	-	132430456	132430471
chr11:132457328-132457395:+:ESC	chr11	132457328	132457395	+	132457374	132457395
chr11:133095767-133095809:+:NSC	chr11	133095767	133095809	+	133095767	133095784
chr12:1777009-1777057:+:NSC	chr12	1777009	1777057	+	1777009	1777024
chr12:5820498-5820547:-:NSC	chr12	5820498	5820547	-	5820530	5820547
chr12:8284486-8284552:+:NSC	chr12	8284486	8284552	+	8284486	8284500
chr12:14661739-14661784:+:NSC	chr12	14661739	14661784	+	14661767	14661784
chr12:25828503-25828571:-:NSC	chr12	25828503	25828571	-	25828553	25828571
chr12:25918229-25918268:-:NSC	chr12	25918229	25918268	-	25918251	25918268
chr12:37568131-37568183:+:ESC	chr12	37568131	37568183	+	37568131	37568147
chr12:45916300-45916347:+:NSC	chr12	45916300	45916347	+	45916329	45916347
chr12:48283933-48283975:+:ESC	chr12	48283933	48283975	+	48283933	48283946
chr12:48283934-48283974:+:ESC	chr12	48283934	48283974	+	48283934	48283947
chr12:48598095-48598176:-:NSC	chr12	48598095	48598176	-	48598095	48598112
chr12:48790019-48790065:+:ESC	chr12	48790019	48790065	+	48790048	48790065
chr12:48940981-48941060:-:ESC-NSC	chr12	48940981	48941060	-	48940981	48940997
chr12:53081130-53081169:-:ESC	chr12	53081130	53081169	-	53081130	53081149
chr12:57073464-57073536:+:ESC	chr12	57073464	57073536	+	57073519	57073536
chr12:60167721-60167765:-:NSC	chr12	60167721	60167765	-	60167721	60167736
chr12:63084319-63084358:+:ESC	chr12	63084319	63084358	+	63084319	63084334
chr12:66572077-66572143:-:ESC	chr12	66572077	66572143	-	66572077	66572092
chr12:96913301-96913346:-:ESC-NSC	chr12	96913301	96913346	-	96913329	96913346
chr12:102601877-102601921:+:NSC	chr12	102601877	102601921	+	102601902	102601921
chr12:104762605-104762643:+:ESC	chr12	104762605	104762643	+	104762625	104762643
chr12:109370920-109370982:+:ESC	chr12	109370920	109370982	+	109370966	109370982
chr12:112457401-112457451:-:NSC	chr12	112457401	112457451	-	112457437	112457451
chr12:113115303-113115358:-:NSC	chr12	113115303	113115358	-	113115342	113115358
chr12:113331262-113331310:+:ESC-NSC	chr12	113331262	113331310	+	113331262	113331283
chr12:117923077-117923126:+:NSC	chr12	117923077	117923126	+	117923077	117923094
chr12:121880316-121880376:+:ESC	chr12	121880316	121880376	+	121880358	121880376
chr12:121909714-121909755:-:ESC	chr12	121909714	121909755	-	121909714	121909733
chr12:122061176-122061217:-:ESC	chr12	122061176	122061217	-	122061201	122061217
chr12:130256515-130256591:-:ESC	chr12	130256515	130256591	-	130256577	130256591
chr12:130952494-130952552:-:NSC	chr12	130952494	130952552	-	130952494	130952511
chr12:131520459-131520538:-:ESC	chr12	131520459	131520538	-	131520459	131520475
chr13:21212045-21212103:+:ESC-NSC	chr13	21212045	21212103	+	21212085	21212103
chr13:25436638-25436682:-:NSC	chr13	25436638	25436682	-	25436638	25436654
chr13:25492816-25492858:-:NSC	chr13	25492816	25492858	-	25492816	25492831
chr13:29055299-29055359:-:ESC	chr13	29055299	29055359	-	29055345	29055359
chr13:36021849-36021907:-:NSC	chr13	36021849	36021907	-	36021893	36021907
chr13:39136180-39136261:-:NSC	chr13	39136180	39136261	-	39136244	39136261
chr13:39263188-39263241:-:NSC	chr13	39263188	39263241	-	39263224	39263241
chr13:41520215-41520264:+:NSC	chr13	41520215	41520264	+	41520215	41520232
chr13:49599024-49599063:+:NSC	chr13	49599024	49599063	+	49599024	49599041
chr13:50257974-50258020:+:NSC	chr13	50257974	50258020	+	50258005	50258020
chr13:51842588-51842629:+:NSC	chr13	51842588	51842629	+	51842588	51842601
chr13:59583492-59583560:-:ESC-NSC	chr13	59583492	59583560	-	59583544	59583560
chr13:68565528-68565573:+:ESC	chr13	68565528	68565573	+	68565556	68565573
chr13:97928477-97928527:-:NSC	chr13	97928477	97928527	-	97928477	97928495
chr13:99093325-99093395:+:ESC-NSC	chr13	99093325	99093395	+	99093379	99093395
chr13:112792474-112792507:-:ESC	chr13	112792474	112792507	-	112792474	112792488
chr13:112797630-112797673:+:ESC	chr13	112797630	112797673	+	112797654	112797673
chr13:113534955-113534993:-:NSC	chr13	113534955	113534993	-	113534955	113534972
chr14:26447699-26447762:+:NSC	chr14	26447699	26447762	+	26447744	26447762
chr14:54414588-54414652:-:NSC	chr14	54414588	54414652	-	54414588	54414607
chr14:54659190-54659260:-:NSC	chr14	54659190	54659260	-	54659190	54659203
chr14:58672764-58672800:+:ESC	chr14	58672764	58672800	+	58672786	58672800
chr14:58672764-58672800:+:ESC	chr14	58672764	58672800	+	58672786	58672800
chr14:60467698-60467747:+:NSC	chr14	60467698	60467747	+	60467698	60467716
chr14:68635937-68635991:+:NSC	chr14	68635937	68635991	+	68635937	68635954
chr14:72066143-72066210:-:NSC	chr14	72066143	72066210	-	72066193	72066210
chr14:75005542-75005584:-:NSC	chr14	75005542	75005584	-	75005569	75005584
chr14:79644773-79644825:+:ESC	chr14	79644773	79644825	+	79644773	79644791
chr14:86018496-86018537:+:NSC	chr14	86018496	86018537	+	86018520	86018537
chr14:88956107-88956187:+:ESC	chr14	88956107	88956187	+	88956170	88956187
chr14:92085320-92085369:-:ESC	chr14	92085320	92085369	-	92085320	92085336
chr14:95782547-95782601:+:NSC	chr14	95782547	95782601	+	95782547	95782561
chr14:96665737-96665802:+:NSC	chr14	96665737	96665802	+	96665737	96665753
chr14:97941317-97941372:-:NSC	chr14	97941317	97941372	-	97941317	97941334
chr14:99183807-99183849:-:ESC	chr14	99183807	99183849	-	99183835	99183849
chr14:100409771-100409821:+:NSC	chr14	100409771	100409821	+	100409803	100409821
chr14:102075745-102075807:+:ESC	chr14	102075745	102075807	+	102075745	102075762
chr15:27115482-27115529:-:ESC	chr15	27115482	27115529	-	27115482	27115500
chr15:38072071-38072124:+:NSC	chr15	38072071	38072124	+	38072071	38072088
chr15:39945994-39946030:-:NSC	chr15	39945994	39946030	-	39945994	39946009
chr15:54898397-54898484:-:NSC	chr15	54898397	54898484	-	54898469	54898484
chr15:63465648-63465699:+:NSC	chr15	63465648	63465699	+	63465683	63465699
chr15:64119636-64119715:+:ESC	chr15	64119636	64119715	+	64119636	64119653
chr15:65103043-65103088:-:NSC	chr15	65103043	65103088	-	65103043	65103060
chr15:66673814-66673890:-:NSC	chr15	66673814	66673890	-	66673874	66673890
chr15:66881252-66881307:-:NSC	chr15	66881252	66881307	-	66881252	66881270
chr15:73841622-73841698:-:ESC	chr15	73841622	73841698	-	73841681	73841698
chr15:73949823-73949899:+:ESC	chr15	73949823	73949899	+	73949883	73949899
chr15:77285640-77285704:-:ESC	chr15	77285640	77285704	-	77285640	77285656
chr15:85930855-85930924:-:NSC	chr15	85930855	85930924	-	85930905	85930924
chr15:91038009-91038073:-:ESC	chr15	91038009	91038073	-	91038054	91038073
chr15:91624208-91624300:-:NSC	chr15	91624208	91624300	-	91624286	91624300
chr15:96484737-96484797:+:ESC	chr15	96484737	96484797	+	96484781	96484797
chr16:1016578-1016635:+:NSC	chr16	1016578	1016635	+	1016617	1016635
chr16:7044166-7044228:+:ESC	chr16	7044166	7044228	+	7044208	7044228
chr16:7331549-7331590:+:NSC	chr16	7331549	7331590	+	7331573	7331590
chr16:12142434-12142476:+:NSC	chr16	12142434	12142476	+	12142461	12142476
chr16:12905294-12905361:+:NSC	chr16	12905294	12905361	+	12905294	12905311
chr16:24888530-24888612:-:ESC	chr16	24888530	24888612	-	24888595	24888612
chr16:27760169-27760220:-:ESC	chr16	27760169	27760220	-	27760202	27760220
chr16:30842746-30842780:+:ESC	chr16	30842746	30842780	+	30842765	30842780
chr16:32791728-32791785:+:ESC	chr16	32791728	32791785	+	32791770	32791785
chr16:48086262-48086305:+:ESC	chr16	48086262	48086305	+	48086262	48086276
chr16:55042326-55042379:-:ESC	chr16	55042326	55042379	-	55042362	55042379
chr16:56474610-56474642:-:ESC-NSC	chr16	56474610	56474642	-	56474610	56474624
chr16:62121639-62121678:-:ESC	chr16	62121639	62121678	-	62121662	62121678
chr16:67958531-67958580:-:NSC	chr16	67958531	67958580	-	67958531	67958551
chr16:70646902-70646948:-:ESC-NSC	chr16	70646902	70646948	-	70646930	70646948
chr16:70771597-70771658:+:NSC	chr16	70771597	70771658	+	70771641	70771658
chr16:71731051-71731100:+:NSC	chr16	71731051	71731100	+	71731051	71731066
chr16:72151152-72151206:-:NSC	chr16	72151152	72151206	-	72151188	72151206
chr16:83824160-83824211:+:ESC	chr16	83824160	83824211	+	83824160	83824176
chr17:2535995-2536040:-:ESC-NSC	chr17	2535995	2536040	-	2535995	2536012
chr17:4357052-4357103:+:ESC	chr17	4357052	4357103	+	4357083	4357103
chr17:7064560-7064604:-:ESC	chr17	7064560	7064604	-	7064560	7064579
chr17:7932110-7932181:+:NSC	chr17	7932110	7932181	+	7932110	7932128
chr17:8367171-8367231:-:ESC	chr17	8367171	8367231	-	8367171	8367188
chr17:11361897-11361939:-:ESC	chr17	11361897	11361939	-	11361897	11361914
chr17:16497464-16497497:+:NSC	chr17	16497464	16497497	+	16497484	16497497
chr17:17031590-17031633:-:ESC	chr17	17031590	17031633	-	17031590	17031606
chr17:19135218-19135261:-:NSC	chr17	19135218	19135261	-	19135244	19135261
chr17:27013003-27013044:-:NSC	chr17	27013003	27013044	-	27013003	27013017
chr17:31932083-31932117:+:ESC	chr17	31932083	31932117	+	31932104	31932117
chr17:31932083-31932117:+:ESC	chr17	31932083	31932117	+	31932104	31932117
chr17:37477949-37478029:-:ESC	chr17	37477949	37478029	-	37478015	37478029
chr17:38359013-38359059:-:ESC	chr17	38359013	38359059	-	38359039	38359059
chr17:38359040-38359084:-:ESC	chr17	38359040	38359084	-	38359040	38359059
chr17:39358507-39358545:+:NSC	chr17	39358507	39358545	+	39358507	39358524
chr17:40908521-40908573:-:NSC	chr17	40908521	40908573	-	40908556	40908573
chr17:43251509-43251564:+:NSC	chr17	43251509	43251564	+	43251509	43251525
chr17:44004127-44004186:-:NSC	chr17	44004127	44004186	-	44004171	44004186
chr17:45793003-45793069:-:NSC	chr17	45793003	45793069	-	45793051	45793069
chr17:48139691-48139762:+:ESC	chr17	48139691	48139762	+	48139747	48139762
chr17:50352507-50352598:+:ESC	chr17	50352507	50352598	+	50352507	50352526
chr17:52947462-52947504:+:NSC	chr17	52947462	52947504	+	52947462	52947479
chr17:63011177-63011218:-:ESC	chr17	63011177	63011218	-	63011177	63011194
chr17:64607305-64607360:-:NSC	chr17	64607305	64607360	-	64607339	64607360
chr17:69152536-69152580:-:ESC	chr17	69152536	69152580	-	69152559	69152580
chr17:71322275-71322346:+:ESC	chr17	71322275	71322346	+	71322275	71322290
chr17:71587418-71587485:-:ESC	chr17	71587418	71587485	-	71587470	71587485
chr17:72904670-72904720:-:NSC	chr17	72904670	72904720	-	72904704	72904720
chr17:74883399-74883445:-:NSC	chr17	74883399	74883445	-	74883427	74883445
chr18:892221-892264:+:ESC-NSC	chr18	892221	892264	+	892221	892237
chr18:892221-892264:+:ESC-NSC	chr18	892221	892264	+	892221	892237
chr18:2650794-2650850:+:ESC	chr18	2650794	2650850	+	2650794	2650810
chr18:6364369-6364413:-:NSC	chr18	6364369	6364413	-	6364398	6364413
chr18:8293195-8293256:+:NSC	chr18	8293195	8293256	+	8293195	8293213
chr18:8818667-8818725:-:NSC	chr18	8818667	8818725	-	8818708	8818725
chr18:19560089-19560153:+:NSC	chr18	19560089	19560153	+	19560134	19560153
chr18:30326810-30326871:+:NSC	chr18	30326810	30326871	+	30326810	30326827
chr18:33491107-33491167:+:NSC	chr18	33491107	33491167	+	33491151	33491167
chr18:38551331-38551380:+:NSC	chr18	38551331	38551380	+	38551365	38551380
chr18:40804054-40804118:-:NSC	chr18	40804054	40804118	-	40804102	40804118
chr18:44568586-44568633:-:NSC	chr18	44568586	44568633	-	44568586	44568602
chr18:45397767-45397823:-:NSC	chr18	45397767	45397823	-	45397767	45397781
chr18:45906876-45906920:-:NSC	chr18	45906876	45906920	-	45906876	45906893
chr18:48216098-48216173:-:ESC-NSC	chr18	48216098	48216173	-	48216154	48216173
chr18:72102685-72102724:-:ESC	chr18	72102685	72102724	-	72102707	72102724
chr18:72102685-72102724:-:ESC	chr18	72102685	72102724	-	72102707	72102724
chr19:1417545-1417605:+:NSC	chr19	1417545	1417605	+	1417588	1417605
chr19:1612019-1612077:+:ESC	chr19	1612019	1612077	+	1612061	1612077
chr19:2201649-2201708:+:NSC	chr19	2201649	2201708	+	2201688	2201708
chr19:3620012-3620082:-:NSC	chr19	3620012	3620082	-	3620064	3620082
chr19:4018410-4018480:+:ESC	chr19	4018410	4018480	+	4018461	4018480
chr19:7736189-7736236:+:ESC	chr19	7736189	7736236	+	7736189	7736202
chr19:10202102-10202150:+:NSC	chr19	10202102	10202150	+	10202131	10202150
chr19:10425834-10425879:+:NSC	chr19	10425834	10425879	+	10425864	10425879
chr19:10828003-10828053:+:NSC	chr19	10828003	10828053	+	10828003	10828018
chr19:11066943-11066988:+:NSC	chr19	11066943	11066988	+	11066973	11066988
chr19:11819374-11819415:+:NSC	chr19	11819374	11819415	+	11819399	11819415
chr19:11819374-11819415:+:NSC	chr19	11819374	11819415	+	11819399	11819415
chr19:12661705-12661746:-:NSC	chr19	12661705	12661746	-	12661729	12661746
chr19:17457861-17457904:+:ESC	chr19	17457861	17457904	+	17457887	17457904
chr19:17969163-17969236:-:NSC	chr19	17969163	17969236	-	17969218	17969236
chr19:33482644-33482692:+:NSC	chr19	33482644	33482692	+	33482678	33482692
chr19:38359321-38359390:-:NSC	chr19	38359321	38359390	-	38359374	38359390
chr19:44322039-44322119:-:NSC	chr19	44322039	44322119	-	44322103	44322119
chr19:47177823-47177883:-:NSC	chr19	47177823	47177883	-	47177863	47177883
chr19:47329447-47329493:-:NSC	chr19	47329447	47329493	-	47329447	47329463
chr19:50092376-50092417:-:NSC	chr19	50092376	50092417	-	50092376	50092391
chr19:51904391-51904437:-:NSC	chr19	51904391	51904437	-	51904391	51904407
chr19:54503875-54503926:-:NSC	chr19	54503875	54503926	-	54503875	54503894
chr19:63482037-63482074:+:NSC	chr19	63482037	63482074	+	63482060	63482074
chr19:63482037-63482074:+:NSC	chr19	63482037	63482074	+	63482060	63482074
chr20:71109-71181:-:NSC	chr20	71109	71181	-	71164	71181
chr20:6764477-6764520:+:ESC-NSC	chr20	6764477	6764520	+	6764502	6764520
chr20:8241462-8241496:-:ESC	chr20	8241462	8241496	-	8241483	8241496
chr20:13252510-13252553:-:ESC	chr20	13252510	13252553	-	13252510	13252527
chr20:15442051-15442089:-:ESC	chr20	15442051	15442089	-	15442074	15442089
chr20:20318421-20318464:+:NSC	chr20	20318421	20318464	+	20318451	20318464
chr20:31722265-31722321:-:ESC-NSC	chr20	31722265	31722321	-	31722265	31722283
chr20:31951574-31951614:+:ESC	chr20	31951574	31951614	+	31951574	31951590
chr20:32141697-32141747:-:ESC	chr20	32141697	32141747	-	32141697	32141712
chr20:42270158-42270205:-:ESC	chr20	42270158	42270205	-	42270158	42270181
chr20:44390407-44390455:+:NSC	chr20	44390407	44390455	+	44390407	44390423
chr20:44625007-44625069:+:NSC	chr20	44625007	44625069	+	44625007	44625024
chr20:47909019-47909087:+:NSC	chr20	47909019	47909087	+	47909019	47909040
chr20:55175687-55175726:+:ESC	chr20	55175687	55175726	+	55175687	55175703
chr20:55329974-55330043:-:NSC	chr20	55329974	55330043	-	55330026	55330043
chr20:56106095-56106156:-:ESC-NSC	chr20	56106095	56106156	-	56106141	56106156
chr20:57999845-57999912:+:ESC	chr20	57999845	57999912	+	57999896	57999912
chr20:58998311-58998367:-:ESC	chr20	58998311	58998367	-	58998311	58998329
chr20:59134072-59134108:+:NSC	chr20	59134072	59134108	+	59134072	59134087
chr20:59326958-59326997:+:NSC	chr20	59326958	59326997	+	59326981	59326997
chr20:59661276-59661319:+:NSC	chr20	59661276	59661319	+	59661302	59661319
chr20:61137149-61137215:+:ESC	chr20	61137149	61137215	+	61137200	61137215
chr20:61388616-61388654:+:NSC	chr20	61388616	61388654	+	61388616	61388635
chr20:62021365-62021426:+:NSC	chr20	62021365	62021426	+	62021405	62021426
chr21:14203379-14203441:+:ESC	chr21	14203379	14203441	+	14203379	14203399
chr21:16509329-16509369:-:NSC	chr21	16509329	16509369	-	16509329	16509344
chr21:23318263-23318338:-:ESC	chr21	23318263	23318338	-	23318263	23318279
chr21:25601734-25601787:-:NSC	chr21	25601734	25601787	-	25601771	25601787
chr21:30669492-30669556:-:ESC	chr21	30669492	30669556	-	30669538	30669556
chr21:31958590-31958662:+:NSC	chr21	31958590	31958662	+	31958590	31958613
chr21:37825343-37825419:+:NSC	chr21	37825343	37825419	+	37825403	37825419
chr21:40459495-40459547:-:ESC-NSC	chr21	40459495	40459547	-	40459495	40459509
chr21:41461360-41461416:-:ESC-NSC	chr21	41461360	41461416	-	41461400	41461416
chr21:42343179-42343242:+:NSC	chr21	42343179	42343242	+	42343226	42343242
chr21:42343226-42343298:+:NSC	chr21	42343226	42343298	+	42343226	42343242
chr21:45125726-45125777:+:NSC	chr21	45125726	45125777	+	45125726	45125740
chr21:46641945-46642020:-:ESC-NSC	chr21	46641945	46642020	-	46641945	46641962
chr22:14833456-14833512:-:NSC	chr22	14833456	14833512	-	14833456	14833475
chr22:15320673-15320710:-:ESC	chr22	15320673	15320710	-	15320673	15320688
chr22:17493177-17493222:+:NSC	chr22	17493177	17493222	+	17493205	17493222
chr22:17882344-17882414:+:NSC	chr22	17882344	17882414	+	17882399	17882414
chr22:19831631-19831686:+:NSC	chr22	19831631	19831686	+	19831631	19831652
chr22:20015102-20015148:+:NSC	chr22	20015102	20015148	+	20015102	20015122
chr22:20345298-20345360:+:NSC	chr22	20345298	20345360	+	20345342	20345360
chr22:20764171-20764230:+:NSC	chr22	20764171	20764230	+	20764171	20764192
chr22:22655820-22655857:+:NSC	chr22	22655820	22655857	+	22655820	22655839
chr22:23697430-23697474:+:NSC	chr22	23697430	23697474	+	23697430	23697448
chr22:23853767-23853830:+:NSC	chr22	23853767	23853830	+	23853808	23853830
chr22:23853826-23853881:+:NSC	chr22	23853826	23853881	+	23853860	23853881
chr22:24960408-24960452:+:NSC	chr22	24960408	24960452	+	24960408	24960427
chr22:26056872-26056967:+:NSC	chr22	26056872	26056967	+	26056947	26056967
chr22:26729533-26729594:+:NSC	chr22	26729533	26729594	+	26729574	26729594
chr22:27164589-27164649:+:NSC	chr22	27164589	27164649	+	27164589	27164603
chr22:27283885-27283929:-:NSC	chr22	27283885	27283929	-	27283885	27283904
chr22:28749949-28749984:-:NSC	chr22	28749949	28749984	-	28749949	28749964
chr22:29062917-29062964:+:NSC	chr22	29062917	29062964	+	29062944	29062964
chr22:29291648-29291709:-:ESC	chr22	29291648	29291709	-	29291648	29291665
chr22:29702616-29702702:+:NSC	chr22	29702616	29702702	+	29702686	29702702
chr22:29911155-29911208:-:NSC	chr22	29911155	29911208	-	29911155	29911178
chr22:30344399-30344464:-:NSC	chr22	30344399	30344464	-	30344441	30344464
chr22:33551905-33551952:-:NSC	chr22	33551905	33551952	-	33551905	33551923
chr22:33703633-33703681:-:NSC	chr22	33703633	33703681	-	33703633	33703656
chr22:34115896-34115956:+:NSC	chr22	34115896	34115956	+	34115936	34115956
chr22:34374130-34374174:+:ESC	chr22	34374130	34374174	+	34374130	34374144
chr22:34374134-34374178:+:ESC	chr22	34374134	34374178	+	34374134	34374148
chr22:34662700-34662765:-:ESC	chr22	34662700	34662765	-	34662741	34662765
chr22:34971380-34971415:+:NSC	chr22	34971380	34971415	+	34971399	34971415
chr22:34971380-34971415:+:NSC	chr22	34971380	34971415	+	34971399	34971415
chr22:35290439-35290487:-:ESC	chr22	35290439	35290487	-	35290472	35290487
chr22:35603823-35603867:+:NSC	chr22	35603823	35603867	+	35603823	35603837
chr22:35604024-35604068:+:NSC	chr22	35604024	35604068	+	35604024	35604038
chr22:35668173-35668255:+:NSC	chr22	35668173	35668255	+	35668236	35668255
chr22:36195888-36195941:+:NSC	chr22	36195888	36195941	+	36195888	36195903
chr22:41067835-41067914:+:ESC	chr22	41067835	41067914	+	41067835	41067853
chr22:44216876-44216912:-:ESC	chr22	44216876	44216912	-	44216876	44216890
chr22:45608181-45608257:+:NSC	chr22	45608181	45608257	+	45608240	45608257
chr22:45746213-45746269:+:NSC	chr22	45746213	45746269	+	45746251	45746269
chr22:47934234-47934314:+:ESC	chr22	47934234	47934314	+	47934292	47934314
chr22:48218122-48218174:-:NSC	chr22	48218122	48218174	-	48218152	48218174
chr22:48561448-48561498:+:NSC	chr22	48561448	48561498	+	48561448	48561468
chr22:48667739-48667797:-:NSC	chr22	48667739	48667797	-	48667739	48667755
chrX:3874610-3874651:-:ESC	chrX	3874610	3874651	-	3874634	3874651
chrX:5868074-5868114:-:NSC	chrX	5868074	5868114	-	5868074	5868092
chrX:9269454-9269496:+:ESC	chrX	9269454	9269496	+	9269479	9269496
chrX:17987841-17987887:-:ESC	chrX	17987841	17987887	-	17987873	17987887
chrX:19303382-19303438:-:NSC	chrX	19303382	19303438	-	19303382	19303400
chrX:21874976-21875021:-:NSC	chrX	21874976	21875021	-	21875001	21875021
chrX:28799627-28799668:+:ESC-NSC	chrX	28799627	28799668	+	28799651	28799668
chrX:30325132-30325178:+:ESC	chrX	30325132	30325178	+	30325132	30325152
chrX:40741553-40741585:-:ESC	chrX	40741553	40741585	-	40741553	40741566
chrX:48697542-48697602:-:ESC	chrX	48697542	48697602	-	48697587	48697602
chrX:49662031-49662089:+:NSC	chrX	49662031	49662089	+	49662031	49662048
chrX:69215769-69215815:+:NSC	chrX	69215769	69215815	+	69215798	69215815
chrX:70284429-70284491:-:NSC	chrX	70284429	70284491	-	70284429	70284446
chrX:71739247-71739309:+:NSC	chrX	71739247	71739309	+	71739247	71739267
chrX:74033253-74033298:-:NSC	chrX	74033253	74033298	-	74033282	74033298
chrX:74921062-74921100:+:ESC	chrX	74921062	74921100	+	74921084	74921100
chrX:76928094-76928139:+:NSC	chrX	76928094	76928139	+	76928124	76928139
chrX:78043356-78043391:-:NSC	chrX	78043356	78043391	-	78043356	78043372
chrX:82651894-82651969:-:ESC	chrX	82651894	82651969	-	82651894	82651907
chrX:89747034-89747107:+:NSC	chrX	89747034	89747107	+	89747088	89747107
chrX:90564095-90564132:-:ESC	chrX	90564095	90564132	-	90564115	90564132
chrX:90564095-90564132:-:ESC	chrX	90564095	90564132	-	90564115	90564132
chrX:106632384-106632433:+:NSC	chrX	106632384	106632433	+	106632416	106632433
chrX:107352067-107352114:+:ESC-NSC	chrX	107352067	107352114	+	107352067	107352085
chrX:110411727-110411797:-:ESC	chrX	110411727	110411797	-	110411780	110411797
chrX:111910611-111910661:-:NSC	chrX	111910611	111910661	-	111910611	111910629
chrX:113792287-113792343:+:ESC	chrX	113792287	113792343	+	113792321	113792343
chrX:132355189-132355257:-:ESC	chrX	132355189	132355257	-	132355189	132355203
chrX:136026082-136026153:+:NSC	chrX	136026082	136026153	+	136026082	136026099
chrX:150087363-150087446:+:ESC-NSC	chrX	150087363	150087446	+	150087429	150087446
chrY:318535-318578:+:ESC	chrY	318535	318578	+	318535	318551
chrY:861819-861881:-:ESC	chrY	861819	861881	-	861819	861836
chrY:862026-862086:-:ESC	chrY	862026	862086	-	862026	862043
chrY:10635508-10635575:-:NSC	chrY	10635508	10635575	-	10635551	10635575
chrY:14818036-14818113:-:ESC	chrY	14818036	14818113	-	14818036	14818052
chrY:21916550-21916607:-:ESC	chrY	21916550	21916607	-	21916591	21916607
chrY:24873267-24873305:-:ESC-NSC	chrY	24873267	24873305	-	24873267	24873284

## Sheet: Ago2 IP Novel
Ago2 IP predicted microRNAs
Name	ESC Ago2/IgG	NSC Ago2/IgG	Chrom	Precursor Start	Precursor End	Strand	Enclosing RefSeq	Nearest Cluster Neighbor	Distance (bp)	Comments	Mature Start	Mature End	Mature	Seed	TargetScan	Seed Match
chr1:3034410-3034450:+:NSC	0.75643	18.5587	chr1	3034410	3034450	+	PRDM16				3034434	3034450	CCTGAGAAAAGGGCCAA	CUGAGAA	TargetScan
chr1:4322324-4322387:-:NSC	0	28.9102	chr1	4322324	4322387	-					4322366	4322387	AGCAGCATTGTACAGGGCT	GCAGCAU	TargetScan	hsa-miR-103 |hsa-miR-107
chr1:6412490-6412532:-:NSC	0.866742	4.18988	chr1	6412490	6412532	-					6412490	6412508	GGCCACTGAGTCAGCACCA	GCCACUG	TargetScan
chr1:23062248-23062295:-:ESC	1.15566	4.46921	chr1	23062248	23062295	-					23062248	23062265	AGGGCATGTCCAGGGGGT	GGGCAUG	TargetScan
chr1:31996857-31996912:-:NSC	4.16453	35.2302	chr1	31996857	31996912	-	BAI2				31996857	31996879	GCCTGGAGCTACTCCACCATCTC	CCUGGAG	TargetScan
chr1:33500129-33500176:-:NSC	0	12.5822	chr1	33500129	33500176	-					33500129	33500146	CAGCATTGTACAGGGCTA	AGCAUUG	TargetScan
chr1:37399762-37399813:+:NSC	0	6.29111	chr1	37399762	37399813	+					37399762	37399778	CAGTGTTCAGAGATGGA	AGUGUUC	TargetScan
chr1:112805924-112805967:-:ESC-NSC	1.76935	9.39991	chr1	112805924	112805967	-					112805950	112805967	ATCTGACCTGATGAAGGT	UCUGACC	TargetScan
chr1:148791040-148791105:+:NSC	4.85862	70.4605	chr1	148791040	148791105	+	ADAMTSL4				148791088	148791105	CCAGAGGTGGGGACTGAG	CAGAGGU	TargetScan
chr1:153214804-153214874:+:ESC	0.126072	4.52507	chr1	153214804	153214874	+	CKS1B				153214804	153214820	CCCCGCCACCGCCTTGG	CCCGCCA	TargetScan
chr1:158136402-158136482:-:NSC	0	5.03289	chr1	158136402	158136482	-	CCDC19				158136402	158136423	CAGTTGGGTCTAGGGGTCAGGA	AGUUGGG	TargetScan
chr1:162036709-162036748:-:NSC	1.15566	6.70381	chr1	162036709	162036748	-					162036709	162036725	TGAGTCAGCAGGATGGG	GAGUCAG	TargetScan
chr1:175143131-175143179:-:NSC	4.5764	1.35365	chr1	175143131	175143179	-	ASTN1				175143162	175143179	AGATGCTGGCATAGCTC	GAUGCUG	TargetScan
chr1:204766775-204766819:-:NSC	1.21344	8.79875	chr1	204766775	204766819	-					204766775	204766794	GTGGACTCAGCATGTGA	UGGACUC	TargetScan
chr1:207863421-207863467:-:ESC	0.346697	5.03289	chr1	207863421	207863467	-	LAMB3				207863448	207863467	CCCTTGGGGCATGGAT	CCUUGGG	TargetScan
chr2:10250200-10250237:-:NSC	0	6.29111	chr2	10250200	10250237	-					10250200	10250215	AGGAAACAGGGACCCA	GGAAACA	TargetScan
chr2:11894519-11894552:-:NSC	0	4.08513	chr2	11894519	11894552	-					11894519	11894535	GACATTCAGACTACCTG	ACAUUCA	TargetScan	hsa-miR-181a |hsa-miR-181b |hsa-miR-181c |hsa-miR-181d
chr2:28072749-28072811:+:ESC	9.02314	0.707042	chr2	28072749	28072811	+	BRE				28072794	28072811	ATTCTAAGTGCCTTGGCC	UUCUAAG	TargetScan
chr2:69184328-69184385:+:NSC	0	25.1644	chr2	69184328	69184385	+	ANTXR1				69184364	69184385	CATCTGGCATCCGTCACACAGA	AUCUGGC	TargetScan
chr2:79729937-79729982:-:NSC	1.38679	7.54179	chr2	79729937	79729982	-					79729966	79729982	ACTCAGTCATGGTCATT	CUCAGUC	TargetScan
chr2:109124387-109124465:-:NSC	0	10.0658	chr2	109124387	109124465	-					109124387	109124405	CTGTGGGCTCAGCTCTGGG	UGUGGGC	TargetScan
chr2:109296468-109296502:-:ESC	0.693394	5.02786	chr2	109296468	109296502	-					109296468	109296483	CTAGGAGGCCTTGGCC	UAGGAGG	TargetScan
chr2:110184836-110184897:-:NSC	0	4.39937	chr2	110184836	110184897	-					110184881	110184897	TCCAGCTCGGTGGCACT	CCAGCUC	TargetScan
chr2:207682965-207683031:-:ESC-NSC	0	41.5213	chr2	207682965	207683031	-	KLF7				207683010	207683031	ATCCCCAGATACAATGGACAA	UCCCCAG	TargetScan
chr2:220479476-220479519:-:NSC	4.85862	1.46646	chr2	220479476	220479519	-					220479476	220479496	GGCTCCTCCTCTCAGGATGTG	GCUCCUC	TargetScan
chr2:237634924-237634971:+:ESC-NSC	31.5494	213.684	chr2	237634924	237634971	+					237634955	237634971	AGGCAAGATGCTGGCATAGCT	GGCAAGA	TargetScan	hsa-miR-31
chr2:239892105-239892168:+:NSC	2.77635	125.822	chr2	239892105	239892168	+					239892105	239892125	GCAGGCACAGACAGCCCTGGC	CAGGCAC	TargetScan
chr3:15512759-15512808:-:NSC	2.25353	13.4076	chr3	15512759	15512808	-	COLQ				15512789	15512808	TCAGGGAGTCAGGGGAGGGC	CAGGGAG	TargetScan
chr3:49286568-49286614:+:ESC	0.694088	5.02786	chr3	49286568	49286614	+					49286596	49286614	GGGGGAAGAAAAGGTGGGG	GGGGAAG	TargetScan
chr3:67358589-67358632:+:NSC	0.346697	7.96077	chr3	67358589	67358632	+					67358615	67358632	CATTCAACTAGTGATTGT	AUUCAAC	TargetScan
chr3:75870132-75870195:+:NSC	0	16.3569	chr3	75870132	75870195	+					75870132	75870149	GTGTTCTCTGATGGACAG	UGUUCUC	TargetScan
chr4:3572511-3572557:+:NSC	0.693394	15.0987	chr4	3572511	3572557	+					3572511	3572529	TTATCAGAATCTCCAGGGG	UAUCAGA	TargetScan	hsa-miR-361-5p
chr4:7512666-7512736:+:ESC	0	5.03289	chr4	7512666	7512736	+	SORCS2				7512719	7512736	CAGCAGTCCCTCCCCCTG	AGCAGUC	TargetScan
chr4:28430312-28430380:+:ESC	0	5.02786	chr4	28430312	28430380	+					28430312	28430329	CCAATTACCACTTCTTT	CAAUUAC	TargetScan
chr4:52502278-52502339:+:NSC	4.01439	94.6692	chr4	52502278	52502339	+					52502319	52502339	TTCAGTGAAGGTGAGGG	UCAGUGA	TargetScan
chr4:111213313-111213357:+:NSC	0.924525	7.54933	chr4	111213313	111213357	+					111213339	111213357	AGGCAAGATGCTGGCATAG	GGCAAGA	TargetScan	hsa-miR-31
chr4:175581532-175581581:+:NSC	1.38818	18.8733	chr4	175581532	175581581	+					175581532	175581548	CTCAGTGACTCATGTGC	UCAGUGA	TargetScan
chr5:1761909-1761972:-:NSC	4.16036	2.19969	chr5	1761909	1761972	-					1761952	1761972	GCAGTTCTGAGCACAGTACAC	CAGUUCU	TargetScan
chr5:6880975-6881023:-:ESC	4.16036	1.25822	chr5	6880975	6881023	-					6880975	6880992	CTAGGGGGTTTGCCCTTG	UAGGGGG	TargetScan
chr5:11008448-11008483:-:NSC	5.77828	416.055	chr5	11008448	11008483	-					11008448	11008463	TTATCAGAATCTCCAGGGGT	UAUCAGA	TargetScan	hsa-miR-361-5p
chr5:31971974-31972011:-:NSC	0	40.2631	chr5	31971974	31972011	-					31971974	31971989	CTCTCCTCCCGGCTTC	UCUCCUC	TargetScan
chr5:33876801-33876848:-:NSC	3.60649	185.697	chr5	33876801	33876848	-	ADAMTS12				33876833	33876848	TGGCTCAGTTCAGCAGGA	GGCUCAG	TargetScan	hsa-miR-24
chr5:86446461-86446516:-:ESC-NSC	6.94088	0.718265	chr5	86446461	86446516	-					86446496	86446516	GAGTGTAGTTCTGAGCAGAGC	AGUGUAG	TargetScan
chr5:96036612-96036657:-:NSC	0.694088	83.0427	chr5	96036612	96036657	-					96036612	96036630	TGGCTCAGTTCAGCAGG	GGCUCAG	TargetScan	hsa-miR-24
chr5:127627965-127628007:+:ESC-NSC	31.234	42.7796	chr5	127627965	127628007	+					127627990	127628007	AGTTTTGCAGGTTTGCAT	GUUUUGC	TargetScan
chr5:165633529-165633574:-:NSC	5.5527	27.6532	chr5	165633529	165633574	-					165633529	165633546	TGGCAGTGTCTTAGCTGGTTGT	GGCAGUG	TargetScan	hsa-miR-34a |hsa-miR-34c-5p |hsa-miR-449a |hsa-miR-449b
chr5:174364768-174364816:+:NSC	22.6509	77.5354	chr5	174364768	174364816	+					174364768	174364785	GTCCAGTTTTCCCAGGAATC	UCCAGUU	TargetScan	hsa-miR-145
chr5:175989055-175989096:-:NSC	0	17.6151	chr5	175989055	175989096	-	SNCB				175989055	175989072	GGGTCCCGGGGAGGGGGG	GGUCCCG	TargetScan
chr6:73734140-73734186:-:ESC	0	43.9937	chr6	73734140	73734186	-					73734140	73734157	TAAAATTTGCATCCAGGA	AAAAUUU	TargetScan
chr6:75211867-75211929:+:ESC	77.6601	1.25822	chr6	75211867	75211929	+					75211867	75211883	TAAGTGCTTCCATGT	AAGUGCU	TargetScan	hsa-miR-302a |hsa-miR-302b |hsa-miR-302c |hsa-miR-302d |hsa-miR-372 |hsa-miR-373 |hsa-miR-520e |hsa-miR-520a-3p |hsa-miR-520b |hsa-miR-520c-3p |hsa-miR-520d-3p |hsa-miR-302e
chr6:85676325-85676368:+:ESC-NSC	11.7995	73.7419	chr6	85676325	85676368	+					85676325	85676341	AGCAGCATTGTACAG	GCAGCAU	TargetScan	hsa-miR-103 |hsa-miR-107
chr6:110990177-110990231:-:NSC	10.7476	52.1012	chr6	110990177	110990231	-					110990177	110990194	AGGAAGCCCTGGAGGGGCTG	GGAAGCC	TargetScan	hsa-miR-671-5p
chr6:138526529-138526608:+:ESC	87.4551	2.51644	chr6	138526529	138526608	+	KIAA1244				138526589	138526608	TAAACGTGGATGTACTTGCTTT	AAACGUG	TargetScan
chr7:30876396-30876461:-:NSC	0.0410072	11.5521	chr7	30876396	30876461	-					30876441	30876461	TCAAAAGGGTCCTGAGGGGGG	CAAAAGG	TargetScan
chr7:62718914-62718973:+:NSC	0.173348	25.1393	chr7	62718914	62718973	+					62718914	62718930	TGGGGCTCAGCGAGTTT	GGGGCUC	TargetScan
chr7:72763594-72763654:+:ESC-NSC	0.945537	27.0247	chr7	72763594	72763654	+					72763594	72763611	GGGCTCACATCACCCCAT	GGCUCAC	TargetScan
chr7:101723100-101723164:+:NSC	7.16507	0.685617	chr7	101723100	101723164	+	SH2B2				101723100	101723117	GCGGCGAGTCCGACTCAT	CGGCGAG	TargetScan
chr7:151229246-151229315:-:NSC	0	99.3002	chr7	151229246	151229315	-					151229298	151229315	TAGCTTATCAGACTGATGTTGA	AGCUUAU	TargetScan	hsa-miR-21 |hsa-miR-590-5p
chr8:10561909-10561981:+:NSC	1.41568	9.08258	chr8	10561909	10561981	+					10561909	10561926	ACCCCACTCCTGGTACC	CCCCACU	TargetScan
chr8:12086678-12086744:+:NSC	4.02168	2.29211	chr8	12086678	12086744	+					12086678	12086695	AGGGACTCTGGGATTCTT	GGGACUC	TargetScan
chr8:12335913-12335979:+:NSC	4.02168	2.29211	chr8	12335913	12335979	+					12335913	12335930	AGGGACTCTGGGATTCTT	GGGACUC	TargetScan
chr8:27799484-27799541:-:ESC	226.273	7.54179	chr8	27799484	27799541	-	SCARA5				27799523	27799541	TCTCCCTTGAGGGCACTTT	CUCCCUU	TargetScan
chr8:28418561-28418607:-:ESC-NSC	2.08018	1246.91	chr8	28418561	28418607	-					28418561	28418577	TTGTCTGCTGAGTTTCC	UGUCUGC	TargetScan	hsa-miR-632
chr8:41239384-41239419:+:NSC	0.218966	430.485	chr8	41239384	41239419	+					41239403	41239419	CAGTAGTCTGCACATTGGTT	AGUAGUC	TargetScan
chr9:36823154-36823204:+:NSC	0.694088	6.29111	chr9	36823154	36823204	+					36823187	36823204	TGTGCAAATCCATGCAAAACT	GUGCAAA	TargetScan	hsa-miR-19a |hsa-miR-19b
chr9:90550580-90550629:-:NSC	1.38818	27.6809	chr9	90550580	90550629	-					90550611	90550629	GCATTGTGCAGGGCTATCA	CAUUGUG	TargetScan
chr9:91825552-91825626:-:NSC	1.38818	89.2445	chr9	91825552	91825626	-					91825552	91825570	TGCCCTCCTTTCTTCCCTC	GCCCUCC	TargetScan
chr9:95621470-95621516:+:NSC	1.24811	37.1852	chr9	95621470	95621516	+					95621470	95621485	TTCAGCAGGAACAGCT	UCAGCAG	TargetScan
chr9:123671954-123672027:-:ESC	4.85376	0	chr9	123671954	123672027	-	TTLL11				123671954	123671971	ACTCAAACTGTGGGGGCACT	CUCAAAC	TargetScan	hsa-miR-371-5p
chr9:130047055-130047115:-:NSC	0.694088	115.756	chr9	130047055	130047115	-		hsa-mir-199b	234	Possible new cluster	130047055	130047076	CAGAAGGGGAGTTGGGAGCAGA	AGAAGGG	TargetScan
chr9:132007407-132007472:+:ESC	9.71723	0	chr9	132007407	132007472	+	FREQ				132007457	132007472	ACTGTGGGGGCATTTCC	CUGUGGG	TargetScan
chr9:137405331-137405378:+:NSC	17.1748	2.66396	chr9	137405331	137405378	+					137405357	137405378	TCTCTCTCTCCCCCGCTCCCC	CUCUCUC	TargetScan
chr9:138845241-138845287:+:ESC	4.85862	2.76532	chr9	138845241	138845287	+	C9orf86				138845270	138845287	CCCCTGGGCCGGCCTTGG	CCCUGGG	TargetScan
chr10:14465213-14465272:-:NSC	4.33371	26.2439	chr10	14465213	14465272	-					14465213	14465230	CAGCCTGACAGGAACAG	AGCCUGA	TargetScan
chr10:49863571-49863628:-:ESC	6.24054	1.79566	chr10	49863571	49863628	-					49863611	49863628	GGGAGTCTACAGCAGGG	GGAGUCU	TargetScan
chr10:112127732-112127786:+:ESC	8.32906	0	chr10	112127732	112127786	+					112127732	112127750	AAGTGCTTCCATGTTT	AGUGCUU	TargetScan	hsa-miR-520f
chr10:114383930-114383994:+:NSC	0	13.8404	chr10	114383930	114383994	+	VTI1A				114383930	114383947	CAGTGCAATGTTTTCCTT	AGUGCAA	TargetScan	hsa-miR-130a |hsa-miR-301a |hsa-miR-130b |hsa-miR-454 |hsa-miR-301b
chr10:126711352-126711417:-:NSC	1.38679	10.0557	chr10	126711352	126711417	-	CTBP2				126711402	126711417	ATGTGGGCTCAGGCTCA	UGUGGGC	TargetScan
chr10:131531562-131531617:-:NSC	0	10.0658	chr10	131531562	131531617	-	EBF3				131531602	131531617	TGCCTTCCTGTCTGTG	GCCUUCC	TargetScan
chr10:132650850-132650910:-:ESC-NSC	37.6494	38.2803	chr10	132650850	132650910	-					132650886	132650910	ACTGGACTTGGAGTCAGAAG	CUGGACU	TargetScan	hsa-miR-378 |hsa-miR-422a
chr11:1837279-1837331:-:NSC	0.694088	6.29111	chr11	1837279	1837331	-					1837310	1837331	CTGGGACAGGAGGAGGAGGCAG	UGGGACA	TargetScan	hsa-miR-1302
chr11:11634783-11634834:-:NSC	22.9049	212.64	chr11	11634783	11634834	-					11634783	11634800	GCTGGTGACATGAGAGGC	CUGGUGA	TargetScan
chr11:11718220-11718271:-:NSC	0	19.7972	chr11	11718220	11718271	-					11718220	11718238	CAGTAGTCTGCACATTGG	AGUAGUC	TargetScan
chr11:15312537-15312579:+:ESC	9.02314	0	chr11	15312537	15312579	+					15312537	15312552	ACTCAGCCTTGAGGGCACT	CUCAGCC	TargetScan
chr11:19720919-19720953:+:NSC	0.231131	201.584	chr11	19720919	19720953	+	NAV2				19720937	19720953	ACAGCAGGCACAGACAG	CAGCAGG	TargetScan	hsa-miR-214
chr11:81279440-81279515:-:NSC	8.32906	1.57121	chr11	81279440	81279515	-					81279440	81279457	TGGGAGCTGGACTACTTC	GGGAGCU	TargetScan	hsa-miR-920
chr11:91654999-91655034:+:NSC	5.46048	165.081	chr11	91654999	91655034	+					91655019	91655034	CTAGACTGAAGCTCCTTGAGG	UAGACUG	TargetScan	hsa-miR-151-3p
chr11:111892102-111892146:-:NSC	2.77635	7.54179	chr11	111892102	111892146	-					111892129	111892146	TTCAAGTAATCCAGGA	UCAAGUA	TargetScan	hsa-miR-26a |hsa-miR-26b |hsa-miR-1297
chr11:112825964-112826009:-:NSC	1.15566	17.5975	chr11	112825964	112826009	-	DRD2				112825990	112826009	TCCCACTACTTCACTTGTGA	CCCACUA	TargetScan
chr11:112847579-112847615:-:NSC	1.38679	11.324	chr11	112847579	112847615	-	DRD2				112847579	112847595	CTGTGGTCTCAGCAAGTG	UGUGGUC	TargetScan
chr11:132430398-132430471:-:NSC	11.1438	196.187	chr11	132430398	132430471	-	OPCML				132430456	132430471	GCAGCATTGTACAGGGCT	CAGCAUU	TargetScan
chr12:25828503-25828571:-:NSC	1.38679	124.362	chr12	25828503	25828571	-					25828553	25828571	TCCCTGAGACCCTAACTTGTGA	CCCUGAG	TargetScan	hsa-miR-125b |hsa-miR-125a-5p
chr12:25918229-25918268:-:NSC	2.08018	20.1114	chr12	25918229	25918268	-					25918251	25918268	CCAGTGTGGCTCAGCGAG	CAGUGUG	TargetScan
chr12:96913301-96913346:-:ESC-NSC	6.93394	0.422904	chr12	96913301	96913346	-					96913329	96913346	TTCTGAGCTGAGGACAG	UCUGAGC	TargetScan
chr12:122061176-122061217:-:ESC	0.584249	8.68784	chr12	122061176	122061217	-	PITPNM2				122061201	122061217	CCGGCATGTCCAGGGCA	CGGCAUG	TargetScan
chr13:21212045-21212103:+:ESC-NSC	56.8583	341.894	chr13	21212045	21212103	+					21212085	21212103	CAGTGCAATGTTAAAAGG	AGUGCAA	TargetScan	hsa-miR-130a |hsa-miR-301a |hsa-miR-130b |hsa-miR-454 |hsa-miR-301b
chr13:25436638-25436682:-:NSC	0.520045	339.38	chr13	25436638	25436682	-					25436638	25436654	TGAGATGAAGCACTGTAGCT	GAGAUGA	TargetScan	hsa-miR-143
chr13:39136180-39136261:-:NSC	11.7877	0.66156	chr13	39136180	39136261	-					39136244	39136261	CCTAGACACCTCCAGTTC	CUAGACA	TargetScan
chr13:99093325-99093395:+:ESC-NSC	0.694088	42.7368	chr13	99093325	99093395	+	CLYBL				99093379	99093395	TGGAGAGAAAGGCAGTA	GGAGAGA	TargetScan	hsa-miR-185
chr13:113534955-113534993:-:NSC	20.1286	101.605	chr13	113534955	113534993	-					113534955	113534972	TGCAGCTGCCTGGGAGTGACTTCA	GCAGCUG	TargetScan
chr14:26447699-26447762:+:NSC	0	6.28482	chr14	26447699	26447762	+					26447744	26447762	AATGTTTTTTCCTGTTTCC	AUGUUUU	TargetScan
chr14:54414588-54414652:-:NSC	2.08226	7.54179	chr14	54414588	54414652	-	GCH1				54414588	54414607	TCCCTGGAGTTTCTTCTT	CCCUGGA	TargetScan
chr14:86018496-86018537:+:NSC	0.663246	6.59906	chr14	86018496	86018537	+					86018520	86018537	TGTATATGCATGTGTGTTT	GUAUAUG	TargetScan
chr14:97941317-97941372:-:NSC	13.1745	35.5092	chr14	97941317	97941372	-					97941317	97941334	TGGAGAGAAAGGCAGTTCCTG	GGAGAGA	TargetScan	hsa-miR-185
chr14:102075745-102075807:+:ESC	4.16036	0.251393	chr14	102075745	102075807	+					102075745	102075762	CTGGAGTCTAGGATTCCA	UGGAGUC	TargetScan
chr15:38072071-38072124:+:NSC	0	46.5077	chr15	38072071	38072124	+	EIF2AK4				38072071	38072088	TACCCTGTAGAACCGAATTTGTG	ACCCUGU	TargetScan	hsa-miR-10a |hsa-miR-10b
chr15:39945994-39946030:-:NSC	5.54715	10.774	chr15	39945994	39946030	-	SPTBN5				39945994	39946009	GCAGCATTCATGTCCC	CAGCAUU	TargetScan
chr15:64119636-64119715:+:ESC	4.85862	1.15222	chr15	64119636	64119715	+					64119636	64119653	GAAAGAGAGCTGAGTGTG	AAAGAGA	TargetScan
chr15:65103043-65103088:-:NSC	2.77635	43.9937	chr15	65103043	65103088	-					65103043	65103060	TGGCTCAGTTCAGCAGGAAC	GGCUCAG	TargetScan	hsa-miR-24
chr15:66881252-66881307:-:NSC	0.346697	5.03289	chr15	66881252	66881307	-	ANP32A				66881252	66881270	GGCCTTGTTCCTGTCCCCA	GCCUUGU	TargetScan
chr15:73841622-73841698:-:ESC	4.85376	1.67595	chr15	73841622	73841698	-					73841681	73841698	AGCCCCCTGGCCCCAAACCC	GCCCCCU	TargetScan
chr15:91038009-91038073:-:ESC	232.287	2.51393	chr15	91038009	91038073	-					91038054	91038073	TAAGTGCTTCCATGTTT	AAGUGCU	TargetScan	hsa-miR-302a |hsa-miR-302b |hsa-miR-302c |hsa-miR-302d |hsa-miR-372 |hsa-miR-373 |hsa-miR-520e |hsa-miR-520a-3p |hsa-miR-520b |hsa-miR-520c-3p |hsa-miR-520d-3p |hsa-miR-302e
chr16:7331549-7331590:+:NSC	1.38818	369.917	chr16	7331549	7331590	+	A2BP1				7331573	7331590	AACATTCATTGCTGTCGGTGG	ACAUUCA	TargetScan	hsa-miR-181a |hsa-miR-181b |hsa-miR-181c |hsa-miR-181d
chr16:24888530-24888612:-:ESC	431.723	2.51393	chr16	24888530	24888612	-	ARHGAP17				24888595	24888612	AAGTGCTTCCATGTTT	AGUGCUU	TargetScan	hsa-miR-520f
chr16:62121639-62121678:-:ESC	81.9443	0.966896	chr16	62121639	62121678	-					62121662	62121678	TAAGTGCTTCCATG	AAGUGCU	TargetScan	hsa-miR-302a |hsa-miR-302b |hsa-miR-302c |hsa-miR-302d |hsa-miR-372 |hsa-miR-373 |hsa-miR-520e |hsa-miR-520a-3p |hsa-miR-520b |hsa-miR-520c-3p |hsa-miR-520d-3p |hsa-miR-302e
chr17:7932110-7932181:+:NSC	1.04009	17.5975	chr17	7932110	7932181	+					7932110	7932128	CTCTGGGAAATGGGACAGG	UCUGGGA	TargetScan
chr17:8367171-8367231:-:ESC	6.94088	1.88545	chr17	8367171	8367231	-	MYH10				8367171	8367188	AAGTGCTGTCATAGCTGAG	AGUGCUG	TargetScan	hsa-miR-512-3p
chr17:40908521-40908573:-:NSC	7.62733	0.785603	chr17	40908521	40908573	-	PLEKHM1				40908556	40908573	CCGCTTTCTGAGCTGGAC	CGCUUUC	TargetScan
chr17:44004127-44004186:-:NSC	26.5801	185.193	chr17	44004127	44004186	-	HOXB3				44004171	44004186	AATCCTTTGTCCCTGGGTGAGAGT	AUCCUUU	TargetScan	hsa-miR-501-5p
chr17:63011177-63011218:-:ESC	214.259	0.209494	chr17	63011177	63011218	-					63011177	63011194	TAAGTGCTTCCATG	AAGUGCU	TargetScan	hsa-miR-302a |hsa-miR-302b |hsa-miR-302c |hsa-miR-302d |hsa-miR-372 |hsa-miR-373 |hsa-miR-520e |hsa-miR-520a-3p |hsa-miR-520b |hsa-miR-520c-3p |hsa-miR-520d-3p |hsa-miR-302e
chr17:72904670-72904720:-:NSC	3.46697	10.0557	chr17	72904670	72904720	-					72904704	72904720	GGTGAGGCTAGCTGGTG	GUGAGGC	TargetScan
chr18:6364369-6364413:-:NSC	2.88914	98.1911	chr18	6364369	6364413	-	L3MBTL4				6364398	6364413	ACATTGCCAGGGAGTT	CAUUGCC	TargetScan
chr18:33491107-33491167:+:NSC	47.8921	25.1644	chr18	33491107	33491167	+					33491151	33491167	CACTGTGGGTACATGCT	ACUGUGG	TargetScan
chr18:40804054-40804118:-:NSC	0.906746	7.69262	chr18	40804054	40804118	-					40804102	40804118	TCCCTGAGCAAAGCCAC	CCCUGAG	TargetScan	hsa-miR-125b |hsa-miR-125a-5p
chr18:45906876-45906920:-:NSC	11.1054	0.583591	chr18	45906876	45906920	-	MYO5B				45906876	45906893	GGGATTCTGTAGCTTCCT	GGAUUCU	TargetScan
chr19:1417545-1417605:+:NSC	10.4113	44.7793	chr19	1417545	1417605	+	APC2				1417588	1417605	AGGAAGCCCTGGAGGGGCTGGAGG	GGAAGCC	TargetScan	hsa-miR-671-5p
chr19:2201649-2201708:+:NSC	5.5527	0.502786	chr19	2201649	2201708	+	AMH				2201688	2201708	TTAGCGGTGGACCGCCCTGCG	UAGCGGU	TargetScan
chr19:10202102-10202150:+:NSC	0.693394	21.3898	chr19	10202102	10202150	+					10202131	10202150	TGTGGGCTCAGCGCGTGGGG	GUGGGCU	TargetScan
chr19:47329447-47329493:-:NSC	12.0188	226.952	chr19	47329447	47329493	-					47329447	47329463	CAGCCCCACAGCCTCAGA	AGCCCCA	TargetScan
chr19:51904391-51904437:-:NSC	295.617	431.053	chr19	51904391	51904437	-	PRKD2				51904391	51904407	AAAAGCTGGGTTGAGAAG	AAAGCUG	TargetScan	hsa-miR-320a |hsa-miR-320b |hsa-miR-320c |hsa-miR-320d
chr19:54503875-54503926:-:NSC	0.751785	108.693	chr19	54503875	54503926	-	SLC6A16				54503875	54503894	CCCTGAGACCCTAACCTTAA	CCUGAGA	TargetScan
chr20:55329974-55330043:-:NSC	22.2108	37.7089	chr20	55329974	55330043	-					55330026	55330043	TTGCACTTGTCTCAGTGA	UGCACUU	TargetScan
chr20:56106095-56106156:-:ESC-NSC	1.38679	67.8761	chr20	56106095	56106156	-					56106141	56106156	TCAGTTCAGCAGGAACAG	CAGUUCA	TargetScan
chr20:61388616-61388654:+:NSC	1.73348	36.2425	chr20	61388616	61388654	+	ARFGAP1				61388616	61388635	TGTTCCTCTGTCTCCCAGAC	GUUCCUC	TargetScan
chr20:62021365-62021426:+:NSC	2.08226	157.278	chr20	62021365	62021426	+	DNAJC5	hsa-mir-941-1	127	Extends mir-947 cluster	62021405	62021426	CACCCGGCTGTGTGCACATGTG	ACCCGGC	TargetScan	hsa-miR-941
chr21:30669492-30669556:-:ESC	1.38679	6.28482	chr21	30669492	30669556	-					30669538	30669556	GGCTTGCATGGGGGACTGG	GCUUGCA	TargetScan
chr22:20345298-20345360:+:NSC	0.138679	5.02786	chr22	20345298	20345360	+					20345342	20345360	CAGGGCTCAGCTCTGTTCC	AGGGCUC	TargetScan
chr22:34115896-34115956:+:NSC	4.85862	0.285674	chr22	34115896	34115956	+	HMOX1				34115936	34115956	CACCTTGCGCTACTCAGGTCT	ACCUUGC	TargetScan
chrX:21874976-21875021:-:NSC	2.08018	64.1052	chrX	21874976	21875021	-					21875001	21875021	TGGCTCAGTTCAGCAGGAA	GGCUCAG	TargetScan	hsa-miR-24
chrX:49662031-49662089:+:NSC	17.3348	206.142	chrX	49662031	49662089	+	CLCN5	hsa-mir-501	961	New member of ~10 Kb cluster	49662031	49662048	AATCCTTGCTATCTGGGTGC	AUCCUUG	TargetScan	hsa-miR-362-5p
chrX:78043356-78043391:-:NSC	0.663246	105.62	chrX	78043356	78043391	-					78043356	78043372	CCAGTTTTCCCAGGA	CAGUUUU	TargetScan
chrX:89747034-89747107:+:NSC	2.77358	13.1981	chrX	89747034	89747107	+					89747088	89747107	CCCAGTGTTTAGACTATCT	CCAGUGU	TargetScan	hsa-miR-199a-5p |hsa-miR-199b-5p
chrX:106632384-106632433:+:NSC	177.687	93.1296	chrX	106632384	106632433	+					106632416	106632433	TCAGGCTCAGTCCCCTCCCGAT	CAGGCUC	TargetScan	hsa-miR-484
chrX:111910611-111910661:-:NSC	1.38679	39.2452	chrX	111910611	111910661	-	AMOT				111910611	111910629	CCTGAGACCCTAGTTCCAC	CUGAGAC	TargetScan
chrX:113792287-113792343:+:ESC	61.7738	2.51644	chrX	113792287	113792343	+	HTR2C	hsa-mir-1912	12	Same intronic segment as nearest neighbor	113792321	113792343	TACCCAGAGCATGCAGTGTGAAC	ACCCAGA	TargetScan	hsa-miR-1912
chrX:150087363-150087446:+:ESC-NSC	9.70751	0.396936	chrX	150087363	150087446	+					150087429	150087446	CCTCAGATCAGAGCCTTGC	CUCAGAU	TargetScan

## Sheet: Ago2 IP Known
Ago2 IP Known microRNAs
microRNA	ESC Ago2/IgG	NSC Ago2/IgG
hsa-let-7a	1.05576	142.689
hsa-let-7astar	0.462263	66.6191
hsa-let-7b	0.999729	100.372
hsa-let-7bstar	2.77358	8.58926
hsa-let-7c	0.99513	105.638
hsa-let-7cstar	0	13.8404
hsa-let-7d	2.3202	245.775
hsa-let-7dstar	2.08018	104.538
hsa-let-7e	4.05764	289.077
hsa-let-7estar	1.38679	130.724
hsa-let-7f	3.07582	133.042
hsa-let-7f-1star	0.53338	4.08513
hsa-let-7f-2star	0	103.174
hsa-let-7g	0.407879	37.4711
hsa-let-7i	0.383018	32.8179
hsa-let-7istar	0	27.6532
hsa-miR-1	0.536399	14.2676
hsa-miR-100	2.40021	169.986
hsa-miR-100star	0	5.02786
hsa-miR-101	13.1745	77.3931
hsa-miR-101star	3.12027	52.8453
hsa-miR-103	15.7242	167.622
hsa-miR-105	2.48991	7.14898
hsa-miR-105star	6.94088	5.03289
hsa-miR-106a	45.5197	205.611
hsa-miR-106astar	40.5635	145.808
hsa-miR-106b	122.464	441.44
hsa-miR-106bstar	374.606	165.77
hsa-miR-107	15.8395	168.945
hsa-miR-10a	1.41694	152.763
hsa-miR-10astar	0	6.28482
hsa-miR-10b	0.990563	68.0694
hsa-miR-10bstar	0	5.03289
hsa-miR-1179	1.73348	60.3947
hsa-miR-1180	94.3016	136.135
hsa-miR-1185	0	18.8733
hsa-miR-1197	2.42688	314.556
hsa-miR-1224-3p	2.31131	31.4241
hsa-miR-1225-3p	0	10.0658
hsa-miR-1226	7.48865	141.925
hsa-miR-1226star	0	6.29111
hsa-miR-1227	34.0103	555.578
hsa-miR-1228	33.3159	251.736
hsa-miR-1228star	100.542	172.547
hsa-miR-1229	10.4009	35.195
hsa-miR-1234	2.08018	10.0658
hsa-miR-1236	3.46697	42.7368
hsa-miR-1237	9.71723	457.993
hsa-miR-1238	0	10.0557
hsa-miR-124	10.5448	11.026
hsa-miR-1247	3.47044	183.517
hsa-miR-124star	1.24811	11.324
hsa-miR-1251	6.94088	13.8404
hsa-miR-1254	20.1084	189.802
hsa-miR-1255a	0	10.0658
hsa-miR-1255b	0	10.0658
hsa-miR-125a-3p	23.5754	393.116
hsa-miR-125a-5p	2.14673	178.972
hsa-miR-125b	0.861737	148.275
hsa-miR-125b-1star	0.970751	49.7867
hsa-miR-125b-2star	0.26669	124.719
hsa-miR-126	0.51111	4.15538
hsa-miR-1262	0	30.1671
hsa-miR-1264	26.3753	0
hsa-miR-1266	11.0943	6.29111
hsa-miR-1267	3.47044	26.4227
hsa-miR-1269	4.16453	256.002
hsa-miR-126star	1.7579	18.4815
hsa-miR-1270	68.4149	253.907
hsa-miR-1271	4.16453	46.5077
hsa-miR-127-3p	57.0316	215.3
hsa-miR-1274b	2.33232	4.29463
hsa-miR-127-5p	2.77358	75.4933
hsa-miR-1276	0.694088	32.6811
hsa-miR-128	8.38676	111.437
hsa-miR-1280	3.43447	10.7884
hsa-miR-1281	2.08018	4.27368
hsa-miR-1283	11.1054	0
hsa-miR-1284	0.694088	5.03289
hsa-miR-1285	67.9526	277.789
hsa-miR-1286	0	5.03289
hsa-miR-1287	3.46697	86.7305
hsa-miR-1292	10.632	93.6438
hsa-miR-129-3p	5.15712	6.46439
hsa-miR-1294	0.694088	5.03289
hsa-miR-129-5p	52.0045	35.195
hsa-miR-1296	2.08226	43.9937
hsa-miR-1297	128.406	219.147
hsa-miR-1298	8.32906	2.51393
hsa-miR-1299	0.694088	5.03289
hsa-miR-129star	5.07044	6.78761
hsa-miR-1301	24.4999	113.975
hsa-miR-1303	15.2699	20.1114
hsa-miR-1304	0.624054	11.3127
hsa-miR-1305	7.63497	3.77467
hsa-miR-1306	9.71723	52.8453
hsa-miR-1307	158.094	119.581
hsa-miR-130a	26.7027	142.823
hsa-miR-130astar	54.1389	154.607
hsa-miR-130b	27.4438	230.135
hsa-miR-130bstar	30.9427	160.417
hsa-miR-132	0.805836	112.964
hsa-miR-1323	60.4986	0
hsa-miR-132star	1.04009	70.0758
hsa-miR-133a	21.4952	24.846
hsa-miR-133b	21.4952	26.6207
hsa-miR-134	27.8513	430.284
hsa-miR-135a	90.0206	54.6779
hsa-miR-135astar	4.16036	39.0049
hsa-miR-135b	113.338	103.251
hsa-miR-135bstar	9.02314	6.29111
hsa-miR-136	12.4811	322.926
hsa-miR-136star	0.346697	62.2197
hsa-miR-137	2.77635	49.3358
hsa-miR-138	2.93207	8.11135
hsa-miR-138-1star	2.54244	6.9133
hsa-miR-138-2star	0	10.0658
hsa-miR-139-3p	4.16453	5.02786
hsa-miR-139-5p	0.841978	7.33229
hsa-miR-140-3p	2.89196	126.592
hsa-miR-140-5p	3.32829	107.279
hsa-miR-141	22.0153	6.53621
hsa-miR-143	0.972443	420.959
hsa-miR-143star	0	71.7187
hsa-miR-145	0.498599	73.5021
hsa-miR-145star	1.38818	212.64
hsa-miR-146a	4.45753	195.222
hsa-miR-146b-3p	0.924525	65.3621
hsa-miR-146b-5p	4.45753	196.951
hsa-miR-147b	0	5.03289
hsa-miR-148a	97.7685	94.6913
hsa-miR-148astar	1.38679	15.0987
hsa-miR-148b	4.62263	169.187
hsa-miR-148bstar	3.47044	14.4551
hsa-miR-149	8.38376	128.68
hsa-miR-149star	0.694088	67.944
hsa-miR-150	12.8663	5.38699
hsa-miR-151-3p	1.76747	32.5025
hsa-miR-151-5p	4.36412	126.616
hsa-miR-152	3.46697	448.317
hsa-miR-153	0.694088	18.8733
hsa-miR-154	7.63497	226.254
hsa-miR-154star	17.5082	178.07
hsa-miR-15a	7.51177	93.6069
hsa-miR-15astar	7.63497	181.184
hsa-miR-15b	15.3317	138.079
hsa-miR-15bstar	13.9449	158.826
hsa-miR-16	1.68904	36.9812
hsa-miR-16-1star	0	6.9133
hsa-miR-16-2star	28.4576	830.853
hsa-miR-17	44.0558	204.874
hsa-miR-17star	67.2592	208.878
hsa-miR-181a	0.804194	101.788
hsa-miR-181a-2star	0.80007	144.356
hsa-miR-181astar	1.04009	102.443
hsa-miR-181b	0.896394	156.634
hsa-miR-181c	0.567322	31.2146
hsa-miR-181cstar	1.61792	242.594
hsa-miR-181d	2.12971	163.784
hsa-miR-182	21.2695	3.18169
hsa-miR-1827	0.694088	8.80756
hsa-miR-182star	4.85862	1.25696
hsa-miR-183	121.113	22.648
hsa-miR-183star	35.3985	2.51644
hsa-miR-184	6.24054	25.9773
hsa-miR-185	22.362	207.758
hsa-miR-186	15.9481	89.5587
hsa-miR-186star	2.77635	5.03289
hsa-miR-187	13.3247	2.80123
hsa-miR-187star	21.5167	0
hsa-miR-188-3p	0	65.4276
hsa-miR-188-5p	7.2113	1349.98
hsa-miR-18a	75.0406	248.734
hsa-miR-18astar	260.977	99.9287
hsa-miR-18b	82.1238	240.999
hsa-miR-18bstar	319.975	155.445
hsa-miR-190	5.82451	99.1431
hsa-miR-190b	3.46697	734.067
hsa-miR-191	5.06368	47.6966
hsa-miR-191star	35.3631	184.774
hsa-miR-192	2.01795	24.3895
hsa-miR-192star	0.693394	22.648
hsa-miR-193a-3p	9.01412	59.9153
hsa-miR-193a-5p	35.8253	127.336
hsa-miR-193b	145.613	163.955
hsa-miR-193bstar	167.108	171.827
hsa-miR-194	2.77635	14.3294
hsa-miR-195	0.536399	9.02321
hsa-miR-195star	5.54715	11.324
hsa-miR-196a	2.42688	116.898
hsa-miR-196b	3.47044	167.176
hsa-miR-197	13.8951	172.476
hsa-miR-199a-3p	0.813856	321.874
hsa-miR-199a-5p	0.478203	272.355
hsa-miR-199b-3p	0.813856	321.874
hsa-miR-199b-5p	0.339809	163.173
hsa-miR-19a	50.6347	356.462
hsa-miR-19astar	0.694088	11.324
hsa-miR-19b	26.1676	221.528
hsa-miR-19b-1star	42.8171	256.421
hsa-miR-19b-2star	42.297	251.393
hsa-miR-200a	28.8914	8.48451
hsa-miR-200bstar	13.1877	0
hsa-miR-200c	23.9221	5.03289
hsa-miR-200cstar	8.32906	1.25696
hsa-miR-203	4.29904	2.19969
hsa-miR-204	27.8334	72.5458
hsa-miR-205	12.1874	1.7067
hsa-miR-206	12.4811	55.3064
hsa-miR-20a	55.1787	445.719
hsa-miR-20astar	9.12969	80.4457
hsa-miR-20b	39.7613	254.963
hsa-miR-20bstar	163.111	14.2456
hsa-miR-21	9.1257	253.748
hsa-miR-210	0.90658	11.7309
hsa-miR-211	37.231	90.4542
hsa-miR-212	2.77358	467.591
hsa-miR-214	0.436581	288.441
hsa-miR-214star	0.610601	504.711
hsa-miR-215	1.92723	28.8009
hsa-miR-216b	2.08018	55.3618
hsa-miR-217	0	11.324
hsa-miR-218	2.0671	95.775
hsa-miR-218-1star	0	59.1365
hsa-miR-218-2star	0	13.8404
hsa-miR-219-1-3p	3.47044	31.4241
hsa-miR-219-2-3p	1.35905	40.38
hsa-miR-219-5p	1.04009	55.6492
hsa-miR-21star	2.42688	123.182
hsa-miR-22	3.857	38.2265
hsa-miR-221	8.17012	222.262
hsa-miR-221star	8.32906	36.4884
hsa-miR-222	22.4968	104.435
hsa-miR-222star	38.8301	248.25
hsa-miR-224	0.827599	7.06659
hsa-miR-22star	1.10943	64.2194
hsa-miR-23a	1.99664	113.74
hsa-miR-23astar	0.694088	54.0495
hsa-miR-23b	1.97308	111.95
hsa-miR-23bstar	2.08018	139.523
hsa-miR-24	3.36565	166.291
hsa-miR-24-1star	1.38679	50.2786
hsa-miR-24-2star	4.16036	103.071
hsa-miR-25	31.5329	127.928
hsa-miR-25star	39.3501	25.3188
hsa-miR-26a	12.8509	157.073
hsa-miR-26a-1star	0.694088	23.9062
hsa-miR-26a-2star	2.77635	23.9062
hsa-miR-26b	11.1476	227.092
hsa-miR-26bstar	0	37.7467
hsa-miR-27a	5.53826	85.2385
hsa-miR-27b	5.70432	83.1117
hsa-miR-27bstar	7.63497	189.992
hsa-miR-28-3p	5.66272	224.556
hsa-miR-28-5p	4.50706	93.54
hsa-miR-296-3p	22.9049	3.77467
hsa-miR-299-3p	27.0424	360.749
hsa-miR-299-5p	15.964	125.382
hsa-miR-29a	1.91745	13.9713
hsa-miR-29astar	2.77358	18.8733
hsa-miR-29b	0.87702	5.94093
hsa-miR-29b-1star	37.0966	137.009
hsa-miR-29b-2star	1.04009	16.3405
hsa-miR-29c	1.49012	9.11908
hsa-miR-29cstar	0.941035	13.8266
hsa-miR-300	0	5.02786
hsa-miR-301a	17.0377	130.287
hsa-miR-301b	18.7216	311.727
hsa-miR-302a	176.284	1.293
hsa-miR-302astar	390.264	0.796397
hsa-miR-302b	175.323	1.29021
hsa-miR-302bstar	192.763	1.25696
hsa-miR-302c	177.589	1.31256
hsa-miR-302cstar	305.49	0.251393
hsa-miR-302d	163.306	1.22895
hsa-miR-302dstar	169.881	0.239422
hsa-miR-302e	1863.63	0.193379
hsa-miR-302f	75.5799	0.942723
hsa-miR-30a	5.56682	219.544
hsa-miR-30astar	1.6671	87.731
hsa-miR-30b	2.97931	129.434
hsa-miR-30bstar	10.4113	149.728
hsa-miR-30c	1.9905	104.444
hsa-miR-30c-1star	8.32906	67.944
hsa-miR-30c-2star	0.693394	83.0427
hsa-miR-30d	9.78708	231.113
hsa-miR-30dstar	1.38818	25.1644
hsa-miR-30e	6.74009	256.822
hsa-miR-30estar	1.79652	88.1184
hsa-miR-31	25.3955	116.334
hsa-miR-31star	10.4009	46.0049
hsa-miR-32	1.38818	74.1609
hsa-miR-320a	130.37	353.675
hsa-miR-320b	136.793	356.087
hsa-miR-320c	165.028	350.306
hsa-miR-320d	113.614	352.255
hsa-miR-323-3p	5.49381	219.969
hsa-miR-323-5p	0.693394	62.9111
hsa-miR-324-3p	11.0943	1111.16
hsa-miR-324-5p	9.01412	28.1769
hsa-miR-326	10.1698	9.42723
hsa-miR-328	15.7169	89.5437
hsa-miR-329	13.6367	73.5743
hsa-miR-32star	4.16036	40.2229
hsa-miR-330-3p	3.05093	44.308
hsa-miR-330-5p	7.63497	1.25696
hsa-miR-331-3p	11.1654	102.455
hsa-miR-331-5p	15.964	342.236
hsa-miR-335	8.04337	253.907
hsa-miR-335star	117.877	247.622
hsa-miR-337-3p	12.0651	106.804
hsa-miR-337-5p	0	69.2022
hsa-miR-338-3p	1.21729	15.6366
hsa-miR-339-3p	2.77358	368.291
hsa-miR-339-5p	13.1325	131.257
hsa-miR-33a	19.5884	864.163
hsa-miR-33astar	7.62733	58.4488
hsa-miR-33b	2.77358	42.1083
hsa-miR-33bstar	7.63497	28.9391
hsa-miR-340	11.441	319.897
hsa-miR-340star	12.2731	197.972
hsa-miR-342-3p	6.32212	116.948
hsa-miR-342-5p	51.3111	93.5777
hsa-miR-345	4.50706	87.9456
hsa-miR-346	3.46697	115.689
hsa-miR-34a	16.475	114.117
hsa-miR-34astar	31.928	147.065
hsa-miR-34b	3.46697	56.5634
hsa-miR-34bstar	3.46697	42.1083
hsa-miR-34c-3p	2.08226	7.54179
hsa-miR-34c-5p	1.98113	21.0542
hsa-miR-361-3p	15.6509	177.715
hsa-miR-361-5p	8.54807	127.091
hsa-miR-362-3p	3.58253	56.9824
hsa-miR-362-5p	16.2948	210.332
hsa-miR-363	46.6613	195.165
hsa-miR-363star	52.7507	18.0165
hsa-miR-365	48.9228	99.4952
hsa-miR-367	268.459	1.00557
hsa-miR-367star	5.5527	0
hsa-miR-369-3p	11.7995	192.944
hsa-miR-369-5p	2.08226	91.8502
hsa-miR-370	17.4215	118.093
hsa-miR-371-3p	43.7275	0
hsa-miR-371-5p	235.292	1.25822
hsa-miR-372	9.47638	0
hsa-miR-373	297.697	1.25696
hsa-miR-373star	12.4811	1.25822
hsa-miR-374a	57.5517	346.503
hsa-miR-374b	46.18	181.598
hsa-miR-374bstar	44.8973	184.774
hsa-miR-375	24.9872	8.80756
hsa-miR-376a	39.1768	729.039
hsa-miR-376astar	0.138679	51.5355
hsa-miR-376b	47.198	633.51
hsa-miR-376c	7.50126	393.053
hsa-miR-377star	1.38818	40.2631
hsa-miR-378	43.4466	42.478
hsa-miR-378star	63.5611	31.0051
hsa-miR-379	28.4576	211.421
hsa-miR-379star	8.32906	284.358
hsa-miR-380	15.2699	535.467
hsa-miR-380star	0.693394	8.79875
hsa-miR-381	34.6697	158.126
hsa-miR-382	12.7122	154.565
hsa-miR-409-3p	13.8679	146.084
hsa-miR-409-5p	10.4113	81.9122
hsa-miR-410	0.693394	117.015
hsa-miR-411	2.77358	121.926
hsa-miR-411star	15.2699	464.284
hsa-miR-412	0.694088	50.907
hsa-miR-421	18.9297	74.0798
hsa-miR-423-3p	15.8285	99.5695
hsa-miR-423-5p	87.7837	201.225
hsa-miR-424	0.520045	58.7631
hsa-miR-424star	0.694088	590.106
hsa-miR-425	5.22935	48.7315
hsa-miR-425star	10.0542	46.9267
hsa-miR-429	4.85862	1.25696
hsa-miR-431	14.5613	160.891
hsa-miR-431star	2.77635	49.8596
hsa-miR-432	31.4801	225.844
hsa-miR-432star	0	6.29111
hsa-miR-433	6.24679	168.433
hsa-miR-448	4.85862	2.51644
hsa-miR-449b	4.16453	3.77467
hsa-miR-450a	13.1877	307.956
hsa-miR-450b-5p	2.77635	95.5293
hsa-miR-452	9.02314	54.1036
hsa-miR-452star	0.694088	7.54933
hsa-miR-453	0.693394	10.0658
hsa-miR-454	0.694088	23.9062
hsa-miR-454star	10.7476	639.795
hsa-miR-455-3p	17.8549	145.769
hsa-miR-455-5p	32.6221	654.25
hsa-miR-483-3p	2.67452	219.653
hsa-miR-483-5p	7.28064	843.872
hsa-miR-484	68.5109	340.958
hsa-miR-485-3p	8.66742	116.269
hsa-miR-486-3p	27.5624	148.47
hsa-miR-486-5p	28.6025	120.789
hsa-miR-487a	22.2108	325.554
hsa-miR-487b	38.1367	109.67
hsa-miR-488	0	30.1973
hsa-miR-489	1.99351	6.29111
hsa-miR-490-3p	0.694088	17.6151
hsa-miR-490-5p	0	64.1693
hsa-miR-491-3p	2.77358	45.296
hsa-miR-491-5p	3.46697	45.2507
hsa-miR-493	3.47044	259.194
hsa-miR-493star	6.94088	320.526
hsa-miR-494	5.20045	79.2725
hsa-miR-495	25.3089	185.277
hsa-miR-496	2.08226	123.306
hsa-miR-497	2.42688	13.0724
hsa-miR-497star	2.77635	15.0836
hsa-miR-498	53.738	0
hsa-miR-499-5p	0	8.80756
hsa-miR-500	18.0282	493.987
hsa-miR-500star	47.198	96.3995
hsa-miR-501-3p	21.1485	110.739
hsa-miR-501-5p	21.8419	177.501
hsa-miR-502-3p	49.2802	98.6233
hsa-miR-502-5p	2.31131	329.325
hsa-miR-503	2.77358	89.2445
hsa-miR-504	13.4056	167.805
hsa-miR-505	27.7056	155.396
hsa-miR-505star	14.0066	87.7361
hsa-miR-512-3p	84.9407	3.77089
hsa-miR-512-5p	295.386	2.82817
hsa-miR-514	2.08018	13.8404
hsa-miR-515-3p	210.098	0
hsa-miR-515-5p	13.8818	0
hsa-miR-516b	33.3162	0
hsa-miR-517a	111.868	0.837976
hsa-miR-517b	110.018	0.942723
hsa-miR-517c	59.9786	1.25696
hsa-miR-517star	31.234	0
hsa-miR-518a-3p	26.3753	0
hsa-miR-518b	100.643	1.25696
hsa-miR-518c	21.4952	0
hsa-miR-518cstar	22.9049	0
hsa-miR-518d-3p	40.9512	0.628482
hsa-miR-518d-5p	25.6813	1.25696
hsa-miR-518e	65.2443	2.51393
hsa-miR-518estar	67.2592	0
hsa-miR-518f	19.415	1.25696
hsa-miR-518fstar	13.8679	0.628482
hsa-miR-519a	23.3443	0.942723
hsa-miR-519astar	67.2592	0
hsa-miR-519b-3p	28.198	0.942723
hsa-miR-519b-5p	67.2592	0
hsa-miR-519c-3p	8.32906	1.25696
hsa-miR-519c-5p	67.2592	0
hsa-miR-519d	127.584	0.754179
hsa-miR-519e	34.7044	1.25822
hsa-miR-519estar	111.054	1.25822
hsa-miR-520a-5p	4.16453	0
hsa-miR-520b	132.571	3.77089
hsa-miR-520c-3p	132.571	1.67595
hsa-miR-520c-5p	25.6813	1.25696
hsa-miR-520d-3p	52.6979	1.25822
hsa-miR-520d-5p	4.50706	0.628482
hsa-miR-520e	24.2688	1.25822
hsa-miR-520f	123.548	2.51393
hsa-miR-520g	98.6931	0.538699
hsa-miR-520h	143.533	0.754179
hsa-miR-521	115.913	5.02786
hsa-miR-522	6.93394	2.51644
hsa-miR-522star	67.2592	0
hsa-miR-523	13.1745	0
hsa-miR-523star	67.2592	0
hsa-miR-524-3p	4.16036	13.3695
hsa-miR-524-5p	4.85376	0
hsa-miR-525-5p	18.0282	0
hsa-miR-526a	25.6813	1.25696
hsa-miR-526b	33.3162	1.25822
hsa-miR-526bstar	122.854	1.67595
hsa-miR-532-3p	7.62733	127.101
hsa-miR-532-5p	12.1839	217.497
hsa-miR-539	2.92216	124.911
hsa-miR-541star	0	30.1973
hsa-miR-542-3p	1.15566	56.1444
hsa-miR-542-5p	0.173348	128.339
hsa-miR-543	36.7499	197.343
hsa-miR-544	3.47044	22.648
hsa-miR-545	7.97403	452.96
hsa-miR-545star	16.6581	157.278
hsa-miR-548b-3p	1.38818	10.0658
hsa-miR-548b-5p	11.0943	99.3002
hsa-miR-548c-5p	2.77635	27.6809
hsa-miR-548d-3p	0	8.80756
hsa-miR-548d-5p	11.0943	101.814
hsa-miR-548e	0	5.03289
hsa-miR-548g	4.16453	1.25822
hsa-miR-548l	1.38818	7.54933
hsa-miR-548n	0.694088	13.8404
hsa-miR-548o	0	7.54933
hsa-miR-548p	0	5.03289
hsa-miR-549	1.38818	7.54179
hsa-miR-550	33.3985	264.8
hsa-miR-550star	31.0046	187.288
hsa-miR-551a	26.1756	356.349
hsa-miR-551b	12.4811	224.997
hsa-miR-551bstar	6.24054	88.0756
hsa-miR-556-3p	0.694088	7.54179
hsa-miR-561	3.92923	7.54933
hsa-miR-574-3p	1.23686	41.6341
hsa-miR-576-3p	0	8.80756
hsa-miR-576-5p	34.6697	78.8745
hsa-miR-577	19.415	7.54933
hsa-miR-579	2.77635	54.1036
hsa-miR-582-3p	1.38679	68.0856
hsa-miR-582-5p	3.46697	75.4179
hsa-miR-584	0	58.4488
hsa-miR-585	6.93394	153.978
hsa-miR-587	0	7.54933
hsa-miR-589	4.99244	30.4066
hsa-miR-589star	6.94088	55.3064
hsa-miR-590-3p	21.5167	261.71
hsa-miR-590-5p	13.6079	206.98
hsa-miR-592	4.16036	56.62
hsa-miR-597	2.77358	72.9769
hsa-miR-598	26.349	236.519
hsa-miR-599	0	6.28482
hsa-miR-602	0	11.3127
hsa-miR-605	9.71723	168.602
hsa-miR-610	1.38818	8.80756
hsa-miR-615-3p	2.08018	29.2244
hsa-miR-616	2.08226	25.1644
hsa-miR-618	0.694088	12.5822
hsa-miR-624star	0	7.54933
hsa-miR-625	13.3286	60.5277
hsa-miR-625star	12.5504	58.6906
hsa-miR-627	0.694088	10.0557
hsa-miR-628-3p	2.77635	49.0707
hsa-miR-628-5p	0.693394	11.5641
hsa-miR-629	48.3064	328.487
hsa-miR-629star	165.721	740.352
hsa-miR-636	21.5167	139.523
hsa-miR-641	12.4811	25.1393
hsa-miR-642	0	120.789
hsa-miR-643	1.38818	8.79875
hsa-miR-652	1.38818	23.2538
hsa-miR-654-3p	64.4856	456.383
hsa-miR-654-5p	1.38818	124.564
hsa-miR-655	0	18.8733
hsa-miR-656	4.16453	99.3002
hsa-miR-659	0	5.03289
hsa-miR-660	5.09378	322.549
hsa-miR-664	5.89385	145.694
hsa-miR-664star	2.77635	47.8125
hsa-miR-665	8.32073	36.6615
hsa-miR-668	0.694088	89.2445
hsa-miR-671-3p	4.16453	22.6254
hsa-miR-671-5p	7.80068	54.8493
hsa-miR-7	11.1308	11.3725
hsa-miR-708	6.48527	78.7488
hsa-miR-708star	1.38679	84.6356
hsa-miR-7-1star	3.46697	40.4323
hsa-miR-720	0.882501	31.3194
hsa-miR-7-2star	0.462263	6.70381
hsa-miR-744	95.6884	162.031
hsa-miR-744star	1.10943	15.0836
hsa-miR-758	8.32906	265.219
hsa-miR-760	15.2699	42.3178
hsa-miR-765	2.77635	35.2302
hsa-miR-766	5.21696	144.176
hsa-miR-767-3p	9.01412	6.29111
hsa-miR-767-5p	38.6567	287.845
hsa-miR-769-3p	21.4952	37.9603
hsa-miR-769-5p	12.5967	124.439
hsa-miR-770-5p	0	9.42723
hsa-miR-873	8.66742	240.08
hsa-miR-874	16.6415	272.761
hsa-miR-875-5p	0	20.1316
hsa-miR-876-3p	1.38818	25.1644
hsa-miR-876-5p	13.1877	56.312
hsa-miR-877	47.1508	71.4375
hsa-miR-877star	33.382	198.286
hsa-miR-885-5p	1.92259	21.7036
hsa-miR-886-3p	24.2688	135.124
hsa-miR-886-5p	27.4206	36.6615
hsa-miR-887	16.2948	120.291
hsa-miR-889	0	6.28482
hsa-miR-891a	0	4.60887
hsa-miR-9	1.02952	18.2581
hsa-miR-92a	108.869	188.637
hsa-miR-92a-1star	96.2484	225.547
hsa-miR-92a-2star	68.8771	108.207
hsa-miR-92b	122.8	109.816
hsa-miR-92bstar	281.056	132.18
hsa-miR-93	76.0299	258.975
hsa-miR-935	40.3902	50.546
hsa-miR-937	2.37735	61.5912
hsa-miR-939	15.964	390.916
hsa-miR-93star	36.6921	104.032
hsa-miR-940	27.7635	57.569
hsa-miR-941	3.47044	163.569
hsa-miR-942	32.6221	84.3009
hsa-miR-943	0.693394	20.1114
hsa-miR-95	3.92923	153.35
hsa-miR-96star	6.94088	0
hsa-miR-98	1.78301	34.9157
hsa-miR-99a	2.64275	147.43
hsa-miR-99astar	0.924525	10.17
hsa-miR-99b	6.57217	215.148
hsa-miR-99bstar	6.93394	119.726
hsa-miR-9star	1.20188	12.5696

## Sheet: hESC lines
hESC Lines Expression Data
miRNA	H1_ESC	HSF1_ESC	HSF6_ESC	RG7_ESC	H1_NSC	HSF1_NPC	HSF6_NPC	RG7_NSC
chr1.112805924-112805967.-.ESC-NSC	2.50395	7.49969	6.95696	2.21119	56.7059	2.76279	4.63133	540.457
chr1.148791040-148791105.+.NSC	1.6693	0.140181	0.966244	0.0460664	0.943669	0.690698	2.7788	0.0818131
chr1.153214804-153214874.+.ESC	36.0986	5.25679	17.9721	4.65271	5.0615	18.3035	37.4211	4.85424
chr1.158136402-158136482.-.NSC	0	0	0	0	0.0857881	0.230233	0.370506	0.027271
chr1.162036709-162036748.-.NSC	0.417325	0.0700906	0.193249	0.0460664	0.171576	0.230233	0.926266	0.054542
chr1.175143131-175143179.-.NSC	444.868	1201.7	447.564	25.9123	1864.78	75.4012	249.721	35.8887
chr1.204766775-204766819.-.NSC	0	0.0700906	0.193249	0	0.343152	0.230233	0.370506	0.054542
chr1.207863421-207863467.-.ESC	0.625987	0.0700906	0.772995	1.52019	0	0.460466	1.29677	0.109084
chr1.23062248-23062295.-.ESC	19.8229	0.0700906	2.12574	0.253365	0	0.345349	0.741013	0.027271
chr1.3034410-3034450.+.NSC	0.208662	0.350453	0.386498	1.47412	1.88734	0.230233	2.03778	20.9441
chr1.31996857-31996912.-.NSC	0.834649	0.490634	0.386498	0.138199	1.37261	2.18721	3.1493	3.87248
chr1.33500129-33500176.-.NSC	5991.32	11524	12606	3648.78	25639.1	6442.14	13393.6	28857.3
chr1.37399762-37399813.+.NSC	0.208662	0.911178	0	0	5.40465	0.345349	0.741013	1.47264
chr1.4322324-4322387.-.NSC	6530.09	13091.6	14107.2	4414.36	28499.6	7529.3	14665.2	36103.9
chr1.6412490-6412532.-.NSC	5.21656	0.350453	12.3679	0.0460664	0.42894	0.920931	28.1585	0.054542
chr10.112127732-112127786.+.ESC	32547.6	13420.2	21332.7	10508.1	22.1333	28.4338	30.9373	45.6244
chr10.114383930-114383994.+.NSC	206.576	8.83142	688.352	0.667963	11.2382	1.95698	562.058	4.44518
chr10.126711352-126711417.-.NSC	0	0	0	0.0230332	0	0	0.370506	0.27271
chr10.131531562-131531617.-.NSC	0	0	0	0	0.343152	1.03605	0.741013	0
chr10.132650850-132650910.-.ESC-NSC	432.14	221.276	211.028	60.7155	490.365	16.1163	24.0829	15.6536
chr10.14465213-14465272.-.NSC	0.834649	7.14924	1.35274	0.184266	17.0718	0.805815	2.03778	9.73575
chr10.49863571-49863628.-.ESC	0.208662	0	0.193249	0.161232	0	0	0.741013	0.0818131
chr11.111892102-111892146.-.NSC	711.956	560.725	617.043	174.891	2599.38	376.546	1000.55	773.515
chr11.112825964-112826009.-.NSC	2.92127	1.19154	2.31899	2.02692	9.86563	2.53256	6.29861	18.8988
chr11.112847579-112847615.-.NSC	0	0.140181	0.772995	0	0.0857881	0.345349	1.66728	0
chr11.11634783-11634834.-.NSC	23.9962	1.4719	17.3924	1.49716	1.11525	0.345349	23.3419	2.39985
chr11.11718220-11718271.-.NSC	45.9057	1455.43	372.584	2.67185	8429.45	423.053	694.885	275.792
chr11.132430398-132430471.-.NSC	6518.82	11728.9	14074.1	4213.46	26237.1	6692.98	14639.6	32003.6
chr11.15312537-15312579.+.ESC	1427.25	126.934	146.483	61.6368	0.686305	0.575582	1.66728	0.109084
chr11.1837279-1837331.-.NSC	1.46064	0.490634	0.193249	0	1.62997	4.37442	2.96405	0.218168
chr11.19720919-19720953.+.NSC	4.59057	584.766	81.1645	0.760096	2722.91	107.288	289.551	244.894
chr11.81279440-81279515.-.NSC	0.208662	0.0700906	0.193249	0	0.42894	0.115116	0.370506	0.299981
chr11.91654999-91655034.+.NSC	39.0199	27.1952	54.6894	22.872	127.824	28.5489	71.1372	101.312
chr12.122061176-122061217.-.ESC	29.8387	0.0700906	22.4169	1.22076	0.0857881	0.920931	0.926266	0.245439
chr12.25828503-25828571.-.NSC	134.17	3982.34	1081.61	51.1567	9811.5	2254.67	9758.21	8924.14
chr12.25918229-25918268.-.NSC	0.208662	0	1.15949	0	0.772093	0.115116	6.11335	0.190897
chr12.96913301-96913346.-.ESC-NSC	2.50395	1.82236	2.70548	3.31678	2.48785	0.460466	2.03778	1.96351
chr13.113534955-113534993.-.NSC	2.71261	2.73353	6.37721	1.61232	66.6573	9.66978	21.3041	22.1441
chr13.21212045-21212103.+.ESC-NSC	1352.97	2007.11	1299.79	1117.62	2868.84	1143.34	2159.13	6296.74
chr13.25436638-25436682.-.NSC	5.63388	395.451	96.6244	1.81962	505.892	46.3919	177.287	413.592
chr13.39136180-39136261.-.NSC	1.6693	2.03263	5.21772	9.05205	3.08837	0	1.29677	7.55407
chr13.99093325-99093395.+.ESC-NSC	51.3309	41.3535	37.1038	11.2402	83.3002	18.0733	51.8709	37.0068
chr14.102075745-102075807.+.ESC	1.87796	0.981268	2.12574	9.23631	0.686305	0.575582	2.03778	2.50893
chr14.26447699-26447762.+.NSC	16.693	11.5649	25.5088	0.852228	74.893	24.2896	47.0543	2.67256
chr14.54414588-54414652.-.NSC	0.417325	0.0700906	0.193249	0.0460664	0.0857881	0.230233	0.370506	0.327252
chr14.86018496-86018537.+.NSC	0.208662	0.350453	0.386498	0	0.600517	1.49651	3.51981	0.027271
chr14.97941317-97941372.-.NSC	51.1223	41.9142	37.1038	12.0003	84.0723	18.1884	50.2036	39.7339
chr15.38072071-38072124.+.NSC	1.87796	43.5263	10.2422	0.207299	2619.28	78.2792	341.607	7.14501
chr15.39945994-39946030.-.NSC	14.3977	4.41571	17.5856	23.609	14.8413	9.55466	20.7484	28.9891
chr15.64119636-64119715.+.ESC	7.09452	4.41571	6.37721	2.09602	2.31628	0.575582	2.7788	0.654504
chr15.65103043-65103088.-.NSC	1422.03	4205.3	2149.7	241.895	18159.6	644.997	2079.65	15088.3
chr15.66881252-66881307.-.NSC	0.625987	0.140181	0.193249	0.0230332	0.0857881	0.460466	0.926266	0.0818131
chr15.73841622-73841698.-.ESC	9.59847	2.17281	2.31899	5.09034	4.11783	0.690698	2.59354	3.29979
chr15.91038009-91038073.-.ESC	34413.6	13540.4	23018.4	10681.8	22.5623	27.8582	35.1981	46.5789
chr16.24888530-24888612.-.ESC	32547.6	13420.2	21332.7	10508.1	22.1333	28.4338	30.9373	45.6244
chr16.62121639-62121678.-.ESC	28161.7	0	18564.3	0	0	0	26.8617	0
chr16.7331549-7331590.+.NSC	59.0515	127.565	145.516	3.82351	1497.77	440.781	1254.53	841.093
chr17.40908521-40908573.-.NSC	14.815	4.62598	12.1747	8.17679	4.88992	1.72675	6.66911	2.83619
chr17.44004127-44004186.-.NSC	8.97248	5.88761	6.37721	1.24379	165.399	3.91396	5.74285	7.63589
chr17.63011177-63011218.-.ESC	28161.7	0	18564.3	0	0	0	26.8617	0
chr17.72904670-72904720.-.NSC	0.417325	0.0700906	0.579746	0.207299	0.171576	0.230233	0.370506	0.0818131
chr17.7932110-7932181.+.NSC	1.25197	0	0.386498	0	0.857881	0.460466	1.29677	0.136355
chr17.8367171-8367231.-.ESC	1306.44	130.719	132.182	23.9315	0.514729	1.26628	1.66728	0.054542
chr18.33491107-33491167.+.NSC	7.09452	1.05136	0.193249	1.12863	2.1447	0.460466	2.22304	2.12714
chr18.40804054-40804118.-.NSC	0.417325	4.4858	1.93249	0.345498	12.1819	2.87791	13.7087	17.6443
chr18.45906876-45906920.-.NSC	0.625987	0.280362	1.35274	1.19773	11.2382	0.920931	1.11152	2.42712
chr18.6364369-6364413.-.NSC	26.5001	52.9885	57.3949	1.52019	152.188	26.707	80.3999	25.7711
chr19.10202102-10202150.+.NSC	0	0.140181	0.193249	0	3.86046	0.230233	0.55576	0.354523
chr19.1417545-1417605.+.NSC	21.2836	43.2459	49.4717	5.04427	54.2181	19.8	49.0921	36.325
chr19.2201649-2201708.+.NSC	195.725	383.255	838.7	8.36105	262.683	235.298	428.491	3.89976
chr19.47329447-47329493.-.NSC	26.7088	10.864	7.15021	1.70446	79.0108	5.75582	15.376	16.0081
chr19.51904391-51904437.-.NSC	181.954	127.355	175.083	15.3631	930.801	106.943	415.152	194.333
chr19.54503875-54503926.-.NSC	132.292	3797.51	1013.98	5.38977	9298.74	2089.02	9229.68	1024.27
chr2.10250200-10250237.-.NSC	0.417325	0	0	0	0.0857881	0.575582	0.185253	0.0818131
chr2.109124387-109124465.-.NSC	0.208662	0.140181	0.193249	0.0230332	1.71576	0.230233	1.11152	0.0818131
chr2.109296468-109296502.-.ESC	0.625987	0.280362	1.15949	0.322465	0.343152	1.49651	1.11152	0.27271
chr2.110184836-110184897.-.NSC	0	0	0	0.0460664	1.54419	0.115116	0	1.52718
chr2.11894519-11894552.-.NSC	0.208662	0.210272	0.386498	0	0.686305	0	0.370506	0.954486
chr2.207682965-207683031.-.ESC-NSC	9.59847	3.57462	6.57046	3.47801	13.8977	4.71977	7.96589	64.6869
chr2.220479476-220479519.-.NSC	0.208662	0.140181	0.193249	0.207299	1.28682	0.805815	0.55576	0.381794
chr2.237634924-237634971.+.ESC-NSC	807.315	2372.43	695.116	74.1669	3282.42	132.844	397.739	177.916
chr2.239892105-239892168.+.NSC	0.417325	21.9384	4.25147	0.0460664	90.678	4.95001	12.0415	4.6088
chr2.28072749-28072811.+.ESC	1.87796	0.0700906	1.35274	1.08256	0.0857881	0.115116	0.926266	0.163626
chr2.69184328-69184385.+.NSC	0.417325	0	0.386498	0.115166	1.4584	0.230233	0	0.736318
chr2.79729937-79729982.-.NSC	0.625987	0.630815	1.93249	0.138199	0.600517	0.230233	2.40829	4.49972
chr20.55329974-55330043.-.NSC	20.2402	4.90634	20.0979	3.54711	11.753	6.3314	17.7843	9.19033
chr20.56106095-56106156.-.ESC-NSC	1314.99	3194.66	2000.51	182.216	14269.8	471.402	1921.26	11982.6
chr20.61388616-61388654.+.NSC	1.46064	0.841087	0.772995	0.138199	5.49044	3.33838	4.26082	2.37258
chr20.62021365-62021426.+.NSC	0.834649	1.33172	5.99071	0.64493	12.954	2.18721	6.11335	0.327252
chr21.30669492-30669556.-.ESC	3.3386	0.350453	1.15949	8.08465	0.686305	0.690698	1.29677	4.33609
chr22.20345298-20345360.+.NSC	0.417325	0.140181	0.193249	0	0.600517	0.690698	1.11152	0.0818131
chr22.34115896-34115956.+.NSC	1.04331	0.981268	3.86498	0.967394	6.00517	4.37442	7.41013	5.72691
chr3.15512759-15512808.-.NSC	1.6693	0.420544	0.579746	0.414598	2.48785	1.26628	0.926266	4.93605
chr3.49286568-49286614.+.ESC	0.834649	0.0700906	0.579746	0.598863	0.257364	1.72675	2.40829	0.109084
chr3.67358589-67358632.+.NSC	0	0.280362	0	0.0230332	2.05891	0.230233	2.22304	26.262
chr3.75870132-75870195.+.NSC	0.417325	0.490634	0.386498	0	3.86046	0.920931	0.926266	0.518149
chr4.111213313-111213357.+.NSC	820.043	2369.69	707.87	71.7023	3277.02	132.384	402.926	167.908
chr4.175581532-175581581.+.NSC	1.6693	1.12145	1.15949	0.0921328	0.857881	1.84186	2.40829	0.354523
chr4.28430312-28430380.+.ESC	0	0	0	0.0230332	0	0	0.185253	0
chr4.3572511-3572557.+.NSC	84.7169	37.5686	64.1586	14.8103	117.53	31.657	115.968	48.4606
chr4.52502278-52502339.+.NSC	9.38981	25.3728	6.18396	0.276398	36.9747	0.345349	19.0811	1.8817
chr4.7512666-7512736.+.ESC	1.46064	0.140181	0.966244	0.184266	0.257364	1.03605	3.1493	0.109084
chr5.11008448-11008483.-.NSC	84.9256	37.6387	60.6801	15.0176	117.53	31.657	110.411	49.1696
chr5.127627965-127628007.+.ESC-NSC	61.3467	54.8108	85.9957	21.8585	19.045	11.6268	24.2682	32.2343
chr5.165633529-165633574.-.NSC	453.632	916.224	628.445	97.7759	474.665	198.23	866.244	265.783
chr5.174364768-174364816.+.NSC	105.792	919.378	305.333	15.5704	3647.37	124.211	471.099	2545.4
chr5.175989055-175989096.-.NSC	12.7284	0.210272	4.44472	0.0460664	0.772093	2.0721	9.26266	0.027271
chr5.1761909-1761972.-.NSC	0.417325	0.140181	0.193249	0.967394	0.343152	0.115116	0.185253	0.981757
chr5.31971974-31972011.-.NSC	0	0	0	0	4.20362	1.15116	0.926266	0
chr5.33876801-33876848.-.NSC	1419.74	4135.91	2177.14	232.727	17822.2	627.154	2103.74	14473.9
chr5.6880975-6881023.-.ESC	11.4764	0.140181	4.25147	0.276398	0.0857881	0.115116	1.66728	0
chr5.86446461-86446516.-.ESC-NSC	0.417325	1.05136	0.579746	0.0921328	0.343152	0.345349	0.185253	0.109084
chr5.96036612-96036657.-.NSC	1408.47	4126.93	2164.97	230.309	17762.9	625.658	2084.84	14261.1
chr6.110990177-110990231.-.NSC	21.9095	52.9184	48.8919	4.97517	53.2744	17.843	47.9806	36.025
chr6.138526529-138526608.+.ESC	3622.59	1275.02	1815.77	985.844	9.77984	7.7128	14.2645	4.55426
chr6.73734140-73734186.-.ESC	0.417325	0.140181	0.193249	0.414598	0.0857881	0	0.741013	0.354523
chr6.75211867-75211929.+.ESC	32993.9	10434.5	22054.7	0	17.6723	20.6058	32.0488	0
chr6.85676325-85676368.+.ESC-NSC	6374.84	12637.8	13724.5	0	26775.1	7270.87	14263.9	0
chr7.101723100-101723164.+.NSC	14.189	0.280362	7.15021	0.0230332	0.171576	0	7.78063	0.136355
chr7.151229246-151229315.-.NSC	4587.02	14282.7	9614.9	822.331	5486.58	2455.66	14679.6	15294.9
chr7.30876396-30876461.-.NSC	0.417325	0.560725	0	0.0460664	3.43152	0.230233	1.85253	4.14519
chr7.62718914-62718973.+.NSC	0.417325	0.841087	0.579746	0.0230332	69.4884	3.79884	8.33639	0.654504
chr7.72763594-72763654.+.ESC-NSC	591.349	39.7414	15.6532	35.402	75.0646	3.45349	8.33639	46.388
chr8.10561909-10561981.+.NSC	65.9373	252.887	227.454	42.9339	929.085	122.599	306.594	535.085
chr8.12086678-12086744.+.NSC	0	1.54199	0.772995	0.0230332	7.80672	1.03605	7.41013	2.56348
chr8.12335913-12335979.+.NSC	0	1.54199	0.772995	0.0230332	7.80672	1.03605	7.41013	2.56348
chr8.27799484-27799541.-.ESC	984.052	70.5111	99.1366	0.322465	0.171576	0.115116	1.48203	0
chr8.28418561-28418607.-.ESC-NSC	44.4451	15.2097	19.9046	1.95782	9.17933	4.48954	8.15114	0.927215
chr8.41239384-41239419.+.NSC	45.9057	1519.21	350.167	3.15555	8752.62	444.234	660.242	344.597
chr9.123671954-123672027.-.ESC	18409.9	1871.49	458.193	280.222	4.80413	4.37442	5.00184	0.899944
chr9.130047055-130047115.-.NSC	0	0.490634	0.772995	0.0230332	2.40207	1.95698	0.55576	0.463607
chr9.132007407-132007472.+.ESC	57.7995	4.41571	13.7207	0.299432	0.0857881	0.115116	0.741013	0.027271
chr9.137405331-137405378.+.NSC	5.0079	2.03263	3.67173	0.783129	36.2026	11.857	8.52165	0.654504
chr9.138845241-138845287.+.ESC	2.08662	0.210272	0.772995	0.690996	0.257364	0.805815	0.55576	0.109084
chr9.36823154-36823204.+.NSC	19757.6	5831.19	10539	7013.84	5880.6	1685.99	4759.9	10788.7
chr9.90550580-90550629.-.NSC	13.9804	195.833	280.597	0.64493	851.876	306.555	480.361	7.9086
chr9.91825552-91825626.-.NSC	1.46064	0	0.772995	0.0230332	1.71576	0.690698	4.81658	0.054542
chr9.95621470-95621516.+.NSC	841.953	1793.97	1269.84	0.875262	7313.78	353.407	1189.88	57.6237
chrX.106632384-106632433.+.NSC	159.001	169.9	259.92	51.5944	372.921	97.3885	219.896	379.503
chrX.111910611-111910661.-.NSC	2.08662	1.40181	5.21772	0.0690996	2.23049	0.920931	32.2341	12.2992
chrX.113792287-113792343.+.ESC	26.2915	6.7287	11.0152	3.33981	0.257364	0.920931	0.55576	0.709046
chrX.150087363-150087446.+.ESC-NSC	2202.22	214.828	3442.34	13.1289	54.3896	53.414	1321.97	4.77243
chrX.21874976-21875021.-.NSC	1421.41	4199.62	2179.27	234.225	18110.5	644.191	2108.18	14569.6
chrX.49662031-49662089.+.NSC	9.59847	1.89245	4.63797	0.552797	90.4206	2.30233	5.5576	0.463607
chrX.78043356-78043391.-.NSC	101.619	853.703	296.25	0	3424.06	117.189	464.059	0
chrX.89747034-89747107.+.NSC	22.7442	983.862	197.887	10.2728	17605.7	339.824	726.563	611.907
hsa-let-7a	5.21656	235.785	67.4438	6.47233	3144.82	203.986	651.906	247.594
hsa-let-7astar	0	4.97643	0.579746	0.368531	22.0475	2.64768	7.78063	3.89976
hsa-let-7b	4.79923	193.801	58.7476	5.18247	2181.42	178.43	587.253	130.683
hsa-let-7bstar	0.417325	1.68217	0.579746	0.0230332	14.584	0.345349	1.11152	0.354523
hsa-let-7c	4.79923	197.585	59.5206	5.59707	2217.28	181.654	597.442	140.118
hsa-let-7cstar	0	0	0	0	0.514729	0.115116	0.926266	0.109084
hsa-let-7d	0.834649	81.1649	16.8126	2.32635	1154.36	37.9884	112.449	35.725
hsa-let-7dstar	0.208662	11.5649	2.51223	0	31.0553	0.920931	5.18709	1.96351
hsa-let-7e	1.25197	69.2495	14.6869	3.73138	1284.76	80.5815	212.3	178.952
hsa-let-7estar	0	0.981268	0.386498	0.0230332	5.0615	0.920931	2.59354	1.85443
hsa-let-7f	2.29529	91.1879	22.4169	3.27071	1831.92	53.414	137.828	124.792
hsa-let-7f-1star	0	3.0139	0.966244	0.0690996	10.8951	0.575582	1.11152	0.627233
hsa-let-7f-2star	0	3.36435	0	0.0230332	15.6134	2.76279	5.5576	2.97254
hsa-let-7g	3.75592	174.876	45.6067	1.17469	1112.33	153.68	425.897	195.915
hsa-let-7i	3.3386	163.942	41.935	0.990428	1033.4	145.968	402.185	182.252
hsa-let-7istar	0	4.97643	1.73924	0.0921328	43.4088	5.06512	13.894	16.9898
hsa-miR-1	5.0079	0.841087	0.386498	3.08645	146.183	0.460466	7.59538	6.13598
hsa-miR-100	22.9529	297.324	66.4776	11.77	4918.66	1759.67	6327.14	3116.8
hsa-miR-100star	0.625987	1.19154	0.193249	0.0921328	0.514729	0.345349	1.85253	1.82716
hsa-miR-101	405.64	158.825	211.801	105.423	397.285	87.4885	194.701	267.474
hsa-miR-101star	7.72051	3.36435	3.86498	1.47412	1.80155	1.72675	2.22304	0.354523
hsa-miR-103	6509.64	13110.7	14047.1	4495.94	28578.4	7547.38	14617.8	37058.8
hsa-miR-105	1.46064	2.52326	0.193249	3.20161	0	1.61163	4.63133	0.981757
hsa-miR-105star	0.625987	2.38308	0.193249	2.46455	0.0857881	0.230233	0.185253	0.599962
hsa-miR-106a	4864.75	5816.75	7324.71	1767.82	2658.57	1719.84	3885.5	3752.52
hsa-miR-106astar	40.2718	9.39214	24.3494	8.61442	0	2.99303	7.59538	9.95392
hsa-miR-106b	929.8	381.573	727.002	191.797	624.451	279.157	717.486	515.913
hsa-miR-106bstar	83.6736	49.8344	54.1097	31.6015	89.7343	29.2396	71.3225	112.411
hsa-miR-107	6498.58	13102.7	14038.8	4474.52	28542.9	7539.32	14610.2	36980.7
hsa-miR-10a	13.1457	243.705	43.6742	0.253365	1162.69	87.7187	761.02	21.735
hsa-miR-10astar	0.208662	2.94381	0.772995	0	1.20103	0.460466	4.63133	0.109084
hsa-miR-10b	1.87796	43.5263	10.2422	0.207299	2619.28	78.2792	341.607	7.14501
hsa-miR-10bstar	0	0	0.193249	0	23.1628	0.805815	1.29677	0.0818131
hsa-miR-1179	6.6772	0.981268	2.51223	0.184266	0.857881	3.45349	5.00184	0.218168
hsa-miR-1180	21.2836	3.29426	17.3924	1.38199	11.4956	9.20931	14.0792	3.9543
hsa-miR-1185	0	0	0	0.0921328	0.257364	0	0	0.518149
hsa-miR-1197	0	0.841087	0.386498	2.48759	0.0857881	0.115116	0.370506	18.6534
hsa-miR-1224-3p	0.208662	0.700906	0.386498	0.0230332	0.943669	1.84186	1.85253	0.027271
hsa-miR-1225-3p	0	0.420544	0.193249	0	0	1.15116	1.29677	0
hsa-miR-1226	0.417325	0.841087	1.93249	0.760096	18.2729	5.29535	9.07741	17.3444
hsa-miR-1226star	0	0	0	0.0230332	0.0857881	0.575582	0.370506	0.027271
hsa-miR-1227	1.46064	1.33172	3.47848	0.368531	2.1447	1.3814	2.22304	5.48147
hsa-miR-1228	1.04331	0.280362	0.579746	0.0690996	1.4584	1.61163	0.926266	1.00903
hsa-miR-1228star	0	0.140181	0.386498	0.0921328	0	1.61163	2.59354	0.0818131
hsa-miR-1229	1.25197	1.05136	1.54599	0.0921328	2.48785	7.82792	8.7069	0.899944
hsa-miR-1234	0	0.490634	0	0.0460664	0.343152	2.64768	1.85253	0.136355
hsa-miR-1236	0	0.140181	0.193249	0.0460664	0.600517	1.26628	0.55576	0.027271
hsa-miR-1237	0	0.0700906	0	0	0.686305	1.26628	0.370506	0.190897
hsa-miR-1238	0.208662	0	0	0.0230332	0	0.115116	0.185253	0
hsa-miR-124	92.4374	152.868	19.1316	41.5749	4.80413	467.833	1446.27	119.911
hsa-miR-1247	3.12994	1.4719	4.25147	0.483697	110.495	4.02907	10.5594	4.28155
hsa-miR-124star	6.88586	35.9565	2.70548	6.97906	0.257364	17.9582	71.8782	19.417
hsa-miR-1251	0.834649	2.2429	0.579746	1.03649	0	8.97908	14.4497	20.3169
hsa-miR-1254	4.17325	2.94381	5.41097	1.86569	3.25995	1.15116	3.70506	5.31785
hsa-miR-1255a	0.208662	0.140181	0.386498	0.0230332	0.343152	0.230233	0.741013	0.0818131
hsa-miR-1255b	0.208662	0.0700906	0.386498	0.0230332	0.343152	0.805815	0.741013	0.0818131
hsa-miR-125a-3p	1.6693	9.25196	7.15021	0.760096	19.045	6.21629	11.1152	15.6263
hsa-miR-125a-5p	209.497	477.527	369.492	53.4831	2500.04	548.76	1439.79	2991.06
hsa-miR-125b	134.17	3982.34	1081.61	51.1567	9811.5	2254.67	9758.21	8924.14
hsa-miR-125b-1star	0.625987	10.6538	3.09198	0.115166	8.23566	3.68373	7.41013	3.32706
hsa-miR-125b-2star	0.208662	0.700906	0.193249	0.115166	47.6124	13.4686	77.0653	30.3254
hsa-miR-126	87.8469	30.0689	30.7266	20.845	85.9597	10.5907	14.8203	42.5973
hsa-miR-1262	0	0.0700906	0.193249	0.0230332	0.171576	0.345349	0	0.381794
hsa-miR-1264	12.7284	17.2423	32.4658	2.30332	0	1.61163	0.370506	0.736318
hsa-miR-1266	0.625987	0.420544	1.54599	0.0690996	0	0.115116	0.185253	0
hsa-miR-1267	2.08662	1.26163	0.772995	0.299432	1.54419	0.920931	0.741013	0.627233
hsa-miR-1269	0	0.140181	3.09198	0	2.40207	2.30233	34.0866	0.54542
hsa-miR-126star	59.6774	74.4362	51.7907	13.4975	41.9504	14.85	16.4875	33.707
hsa-miR-1270	0.208662	0.210272	0.193249	2.94825	1.97313	0.345349	0.185253	2.20895
hsa-miR-1271	2.08662	0.420544	1.93249	1.05953	9.26511	2.53256	12.5972	9.89938
hsa-miR-127-3p	0.625987	38.2695	10.6287	12.2306	1.28682	0.460466	0	33.8706
hsa-miR-1274b	26.5001	135.976	91.4067	3.45498	93.5948	37.5279	114.857	17.1535
hsa-miR-127-5p	0.417325	17.8731	3.86498	6.56446	0.686305	0.230233	0.185253	10.663
hsa-miR-1276	1.25197	0.0700906	0.193249	0.0460664	0.171576	0.345349	0.55576	1.00903
hsa-miR-128	32.76	20.116	41.935	15.5704	107.321	39.0245	155.798	57.2146
hsa-miR-1280	217.218	389.073	680.816	35.8397	237.547	34.3047	195.998	144.1
hsa-miR-1281	2.92127	0.140181	0.966244	0	1.02946	1.3814	9.07741	0.054542
hsa-miR-1283	19.1969	3.99516	4.05823	1.31289	0	0.230233	0	0.027271
hsa-miR-1284	0.208662	0	0	0	0.171576	0	0.185253	0.245439
hsa-miR-1285	7.09452	3.36435	4.44472	1.38199	7.54935	19.2244	11.4857	5.75418
hsa-miR-1286	0.625987	0.700906	0.772995	0.115166	0.171576	0.575582	0.926266	0.27271
hsa-miR-1287	2.71261	0.981268	5.99071	0.299432	4.54677	4.25931	7.03962	14.8354
hsa-miR-1292	1.46064	1.26163	1.93249	1.63536	2.31628	0.805815	1.85253	4.71789
hsa-miR-129-3p	24.6222	29.5782	13.7207	8.61442	53.446	14.5047	39.2737	13.8537
hsa-miR-1294	0	0.140181	0	0.0690996	0.514729	0	0.55576	0.163626
hsa-miR-129-5p	2.92127	6.23806	2.12574	0.921328	1.02946	3.10814	13.7087	0.572691
hsa-miR-1296	3.54726	0.700906	1.15949	0.207299	3.17416	1.49651	3.1493	1.30901
hsa-miR-1297	23.3702	58.8761	80.9713	0.0230332	277.439	43.7442	150.24	0.54542
hsa-miR-1298	14.3977	5.32689	11.9814	0.322465	0.257364	0.575582	0	0
hsa-miR-1299	0.208662	0.210272	0.579746	0.0690996	0.257364	0.575582	0	0
hsa-miR-129star	24.4135	29.4381	13.7207	8.22285	53.3602	14.3896	39.2737	13.5264
hsa-miR-1301	2.92127	2.87371	6.37721	1.63536	67.0005	9.78489	21.6746	22.2532
hsa-miR-1303	2.92127	1.40181	2.12574	0.760096	1.71576	4.25931	2.7788	0.436336
hsa-miR-1304	3.12994	3.57462	3.86498	0.598863	6.77726	20.9512	10.0037	0.599962
hsa-miR-1305	1.04331	0.630815	1.15949	0.391564	0.171576	0.345349	0.55576	1.66353
hsa-miR-1306	1.04331	1.05136	2.12574	0.184266	1.02946	0.460466	1.85253	1.77262
hsa-miR-1307	73.8665	47.5214	138.946	5.2055	66.7431	27.1675	60.9483	2.99981
hsa-miR-130a	1285.57	2099.28	1053.59	1159.15	3169.18	1180.52	2027.23	6466.97
hsa-miR-130astar	10.2245	15.9807	15.0734	1.88872	15.4419	5.29535	12.0415	12.5992
hsa-miR-130b	615.137	634.881	619.362	205.525	884.99	389.209	729.712	2887.32
hsa-miR-130bstar	30.4647	25.0223	42.708	4.21508	34.6584	28.2035	72.9898	85.6855
hsa-miR-132	2.08662	32.2417	20.0979	0.322465	92.3938	64.235	77.6211	40.2793
hsa-miR-1323	143.768	10.2332	13.1409	6.47233	0.257364	0.115116	0.185253	0
hsa-miR-132star	0.834649	4.4858	1.54599	0.115166	34.6584	7.13722	21.8599	12.0811
hsa-miR-133a	1.04331	0.981268	1.73924	0.230332	69.4884	0.230233	14.2645	1.09084
hsa-miR-133b	0.834649	0.981268	1.73924	0.253365	69.4884	0.230233	14.2645	1.09084
hsa-miR-134	0.625987	41.6338	4.25147	4.67574	1.4584	0.575582	0.185253	36.2159
hsa-miR-135a	209.08	193.17	123.486	169.686	45.6393	545.076	1271.76	1205.32
hsa-miR-135astar	0	0.280362	0.386498	0.0460664	0	1.61163	7.41013	0.245439
hsa-miR-135b	204.489	70.1607	179.335	104.363	50.7865	244.392	310.114	731.9
hsa-miR-135bstar	1.25197	1.68217	3.47848	0.299432	0.772093	5.41047	2.59354	4.39063
hsa-miR-136	2.29529	259.616	50.6312	43.7861	1.97313	1.3814	2.40829	136.628
hsa-miR-136star	0.417325	15.7003	3.47848	7.60096	0.257364	0.115116	0	23.0713
hsa-miR-137	0	0.140181	1.54599	0	0.686305	10.7058	27.047	6.92684
hsa-miR-138	164.217	150.134	78.459	54.8881	48.8134	61.9326	275.471	47.7788
hsa-miR-138-1star	1.04331	1.33172	1.54599	0.276398	0.171576	0.690698	0.741013	0.190897
hsa-miR-138-2star	0	0.210272	0	0	0.0857881	0.575582	1.29677	0.163626
hsa-miR-139-3p	0.208662	0	0	0	0	0	0.370506	0.027271
hsa-miR-139-5p	1.87796	2.52326	1.93249	0.322465	0.42894	6.3314	13.7087	2.45439
hsa-miR-140-3p	248.308	769.174	608.541	117.584	1596.77	265.804	463.689	1328.7
hsa-miR-140-5p	10.2245	38.7601	34.205	2.39545	48.3845	18.3035	44.2755	31.198
hsa-miR-141	228.485	100.93	37.8768	42.8648	1.4584	0.230233	0.55576	1.47264
hsa-miR-143	5.0079	395.521	96.6244	1.81962	506.064	46.3919	177.287	415.501
hsa-miR-143star	0	1.05136	0.386498	0.0230332	3.6031	0.690698	0.926266	2.5362
hsa-miR-145	104.957	921.551	306.106	15.7317	3655.34	124.671	471.84	2563.37
hsa-miR-145star	1.04331	4.06525	1.73924	0.0690996	5.7478	0.115116	2.03778	4.47245
hsa-miR-146a	7.30318	42.4749	13.3342	0.50673	389.993	7.59768	17.4138	3.29979
hsa-miR-146b-3p	0.417325	0.0700906	0.193249	0.0230332	7.8925	0.230233	0.926266	0.163626
hsa-miR-146b-5p	7.30318	42.4048	13.3342	0.57583	393.338	7.59768	17.5991	3.27252
hsa-miR-147b	0	0.140181	0.193249	0.0460664	0.171576	0	0.370506	0.572691
hsa-miR-148a	223.269	150.625	171.798	125.255	354.391	11.2814	76.6948	47.1789
hsa-miR-148astar	6.46853	2.2429	2.89873	1.93479	2.40207	0	0.926266	0.381794
hsa-miR-148b	22.9529	18.574	28.2143	7.09423	88.9622	23.2535	68.5437	65.805
hsa-miR-148bstar	1.87796	5.67734	6.57046	1.03649	7.63514	2.30233	6.29861	8.45402
hsa-miR-149	10.4331	18.9245	21.2574	2.41849	80.0403	61.5873	135.42	113.911
hsa-miR-149star	0	0	0	0	0.171576	0.575582	0.370506	0.054542
hsa-miR-150	2.92127	0.981268	0.386498	2.07299	0.0857881	0.230233	0	0.0818131
hsa-miR-151-3p	39.0199	27.1952	54.6894	22.872	127.824	28.5489	71.1372	101.312
hsa-miR-151-5p	307.568	158.475	283.883	105.4	745.07	144.356	402.185	598.899
hsa-miR-152	2.92127	74.3661	21.2574	0.345498	201.945	8.51861	25.1944	39.7066
hsa-miR-153	2.29529	1.33172	0.386498	0.944361	0.772093	37.5279	56.5022	84.1584
hsa-miR-154	0	8.06042	2.51223	2.74095	0.257364	0.115116	0.741013	4.19974
hsa-miR-154star	1.46064	6.44833	2.12574	56.3162	1.02946	0	0.55576	27.4619
hsa-miR-15a	153.158	58.9462	111.311	6.5184	247.584	88.985	244.349	41.8337
hsa-miR-15astar	3.96458	2.59335	11.5949	1.17469	15.0129	2.64768	10.5594	7.17228
hsa-miR-15b	366.828	139.901	306.299	153.585	480.413	163.58	516.301	528.812
hsa-miR-15bstar	17.7363	9.6725	26.6683	12.461	37.7468	13.0082	35.9391	29.0982
hsa-miR-16	168.599	177.329	404.277	117.746	374.122	214.692	394.589	805.804
hsa-miR-16-1star	0.208662	0.350453	1.73924	0.0460664	1.62997	0.690698	1.48203	0.572691
hsa-miR-16-2star	29.8387	6.16797	23.1899	5.6201	25.908	6.44652	23.7124	7.19955
hsa-miR-17	6569.32	6953.2	9599.83	1786.73	2688.77	2035.37	5324.55	3788.49
hsa-miR-17star	341.58	202.352	221.463	79.6718	94.9674	63.8896	126.528	69.2957
hsa-miR-181a	27.5434	119.294	88.1215	2.87915	2142.9	537.248	1525	549.675
hsa-miR-181a-2star	4.38191	6.16797	10.4354	1.19773	83.2144	42.1326	94.1086	288.173
hsa-miR-181astar	2.08662	10.3734	4.63797	0.50673	167.973	49.6152	100.037	83.3948
hsa-miR-181b	59.2601	130.999	147.449	3.82351	1531.49	449.184	1291.03	841.993
hsa-miR-181c	13.7717	40.5124	32.2726	1.22076	461.54	152.759	562.799	14.3991
hsa-miR-181cstar	2.29529	10.4435	4.83122	0.714029	163.684	49.1547	100.407	32.3162
hsa-miR-181d	50.079	111.584	124.066	2.48759	1299.35	369.524	1091.14	377.813
hsa-miR-182	211.584	116.631	66.8641	74.1439	26.9375	0.920931	3.1493	3.08163
hsa-miR-1827	0	0	0	0	0.772093	0	0	0
hsa-miR-182star	3.96458	1.89245	0.772995	0.990428	0	0	0.185253	0
hsa-miR-183	44.2364	44.5776	30.9198	15.5935	7.54935	0.575582	1.48203	0.627233
hsa-miR-183star	10.6418	6.65861	3.28523	1.91176	0.943669	0	0.185253	0.109084
hsa-miR-184	3.75592	0.770997	0.579746	0.184266	0.171576	0.230233	0.185253	6.32688
hsa-miR-185	51.1223	41.9843	37.1038	12.0464	84.2439	18.1884	50.2036	39.7611
hsa-miR-186	36.3073	40.3021	43.481	13.0138	58.4217	17.4977	50.3889	31.2526
hsa-miR-186star	4.17325	5.11661	5.79746	1.03649	1.28682	1.3814	3.51981	3.87248
hsa-miR-187	119.146	88.1039	166.774	28.3539	1.4584	0.690698	2.22304	1.00903
hsa-miR-187star	1.87796	4.20544	4.25147	0.437631	0	0.230233	0	0
hsa-miR-188-3p	2.08662	0.560725	0.193249	0.276398	42.8083	0.690698	0.926266	2.50893
hsa-miR-188-5p	19.4056	16.0507	18.9384	2.09602	200.916	6.3314	13.153	19.3624
hsa-miR-18a	2106.24	552.734	1340.95	259.907	503.061	239.672	396.071	776.733
hsa-miR-18astar	43.8191	8.83142	22.9966	6.74873	9.17933	4.14419	6.48386	7.17228
hsa-miR-18b	2102.27	551.333	1337.28	252.928	500.659	239.672	395.516	765.525
hsa-miR-18bstar	14.189	1.89245	8.11645	0.483697	0	1.03605	1.66728	0.736318
hsa-miR-190	5.63388	5.9577	13.3342	2.69488	18.0155	10.3605	19.8221	20.3715
hsa-miR-190b	4.38191	5.1867	11.4017	0.0921328	12.5251	8.86396	17.4138	1.44536
hsa-miR-191	698.81	914.963	813.191	302.679	1180.36	372.862	982.768	1458.02
hsa-miR-191star	2.29529	1.26163	2.70548	0.322465	1.97313	0.920931	0.926266	3.81794
hsa-miR-192	89.5162	114.248	145.516	31.901	116.329	37.5279	73.7308	129.346
hsa-miR-192star	1.25197	0.490634	0.579746	0.138199	1.54419	0.345349	0.55576	0.736318
hsa-miR-193a-3p	15.2324	18.0834	15.2667	0.852228	34.83	1.3814	3.51981	1.28174
hsa-miR-193a-5p	21.7009	10.864	16.4261	2.69488	36.031	1.03605	10.0037	9.16306
hsa-miR-193b	76.3704	76.8193	94.4987	11.9773	72.7483	20.721	57.4285	30.4072
hsa-miR-193bstar	3.12994	2.03263	2.31899	2.28029	5.14729	0.345349	1.85253	3.73613
hsa-miR-194	5.84255	5.1867	9.27594	2.69488	5.66201	1.03605	2.7788	4.22701
hsa-miR-195	18.1536	44.3673	16.4261	3.22465	8.6646	3.56861	6.85437	3.43615
hsa-miR-195star	0.834649	0.630815	0.386498	0.138199	0.0857881	0.230233	0.185253	0.027271
hsa-miR-196a	0	3.85498	0.966244	0	60.0517	2.18721	2.96405	0.0818131
hsa-miR-196b	0	4.90634	0.772995	0	52.3307	1.61163	2.96405	0.136355
hsa-miR-197	10.8504	5.81752	12.1747	2.07299	25.908	11.5116	20.1926	30.7344
hsa-miR-199a-3p	35.6813	1578.58	367.366	3.50105	9175.46	462.883	689.883	398.13
hsa-miR-199a-5p	9.18114	2052.46	421.282	2.87915	8186.16	323.132	714.892	698.302
hsa-miR-199b-3p	35.6813	1578.58	367.366	3.50105	9175.46	462.883	689.883	398.13
hsa-miR-199b-5p	22.7442	1006.29	199.433	10.5492	17691	343.277	727.674	624.97
hsa-miR-19a	15062.1	3606.72	6060.09	5280.78	4230.73	1072.08	2685.62	8207.19
hsa-miR-19astar	7.30318	1.33172	3.67173	1.42806	0	0	1.48203	1.14538
hsa-miR-19b	21104.5	6212.2	11099.1	7508.11	6210.37	1820.57	5025.73	11540.8
hsa-miR-19b-1star	61.1381	54.8108	86.3822	22.5495	19.3881	11.7419	23.7124	33.0252
hsa-miR-19b-2star	61.1381	54.8108	86.189	21.9737	19.1307	11.7419	23.7124	32.2889
hsa-miR-200a	226.399	100.79	37.6835	42.0586	1.37261	0.230233	0.741013	1.39082
hsa-miR-200bstar	1.46064	0.0700906	0.579746	0.760096	0.171576	0.230233	0	0
hsa-miR-200c	14.3977	6.16797	6.18396	3.84654	0	0.115116	0	0.027271
hsa-miR-200cstar	7.09452	3.36435	0.772995	1.03649	0.171576	0.115116	0	0.218168
hsa-miR-203	3.3386	6.37824	4.63797	1.33593	3.17416	0.230233	0.370506	0.218168
hsa-miR-204	47.3664	36.7976	48.5055	35.1256	21.7902	170.718	28.1585	615.398
hsa-miR-205	1707.07	199.127	338.379	18.058	904.292	0.920931	1.66728	2.56348
hsa-miR-206	0	1.12145	0.193249	0.0230332	187.533	1.3814	60.2073	0.027271
hsa-miR-20a	5408.74	5276.14	7943.69	1375.61	1688.31	1548.66	4467.01	3122.1
hsa-miR-20astar	32.9687	15.2798	27.2481	19.417	11.9245	5.52559	5.74285	18.9534
hsa-miR-20b	5551.04	5190.98	7695.75	786.054	1538.01	1484.77	4385.68	1593.39
hsa-miR-20bstar	175.485	63.6423	85.2227	51.364	1.71576	13.1233	54.6497	65.7232
hsa-miR-21	4587.02	14282.7	9614.9	822.331	5486.58	2455.66	14679.6	15294.9
hsa-miR-210	193.639	146.209	201.559	37.5441	1308.87	130.772	773.062	249.257
hsa-miR-211	45.9057	36.2368	48.3122	32.7762	21.7902	170.372	28.3437	573.21
hsa-miR-212	0.208662	7.92024	5.41097	0.0460664	17.7581	7.94303	9.07741	8.07222
hsa-miR-214	4.38191	599.555	80.1983	0.829195	2777.82	110.742	288.069	253.648
hsa-miR-214star	2.08662	302.511	84.643	0.50673	1038.12	83.8047	141.348	96.6758
hsa-miR-215	82.839	104.575	132.569	27.9623	108.093	33.9593	67.9879	111.266
hsa-miR-216b	0.208662	0.140181	0	0	0.171576	0.805815	10.0037	0.981757
hsa-miR-217	0	0	0	0.0230332	0.343152	0.805815	6.11335	1.0363
hsa-miR-218	43.6104	274.895	217.598	41.1834	2435.61	931.637	1177.84	3589.68
hsa-miR-218-1star	0.834649	0.350453	1.15949	0.138199	15.3561	3.79884	3.1493	11.8084
hsa-miR-218-2star	0.208662	0.0700906	0.772995	0.0460664	4.71834	0.345349	2.40829	1.11811
hsa-miR-219-1-3p	0	0.0700906	0.193249	0.0460664	0.600517	5.18024	6.11335	6.40869
hsa-miR-219-2-3p	3.3386	1.82236	14.1072	0.829195	0.943669	126.628	616.523	73.2772
hsa-miR-219-5p	2.71261	0.420544	3.09198	0.391564	0.686305	31.5419	167.098	54.5966
hsa-miR-21star	29.0041	25.2326	31.6928	5.87347	16.2997	4.83489	37.4211	100.794
hsa-miR-22	60.7207	46.5402	42.1282	4.00778	150.558	7.0221	32.9751	73.5227
hsa-miR-221	1013.89	589.462	517.714	66.1744	333.029	136.989	520.932	43.4155
hsa-miR-221star	14.6064	5.46707	5.02447	2.62578	5.91938	1.26628	8.15114	5.99962
hsa-miR-222	489.522	338.678	337.412	75.5719	171.061	59.1698	280.473	13.0355
hsa-miR-222star	68.4413	49.4139	47.9257	13.6357	4.20362	1.3814	9.81842	23.8894
hsa-miR-224	7.72051	13.3172	12.1747	2.34939	28.8248	12.6628	18.7106	33.2979
hsa-miR-22star	26.2915	24.5317	16.0397	1.70446	50.1002	8.51861	43.3492	20.8896
hsa-miR-23a	816.705	2043	1383.66	119.404	7167.51	580.993	1751.38	3500.51
hsa-miR-23astar	0.834649	0.350453	0.966244	0.0690996	0.257364	0.805815	1.29677	0.518149
hsa-miR-23b	811.697	2040.34	1380.96	118.275	7151.04	582.144	1750.46	3521.21
hsa-miR-23bstar	0	0.630815	1.15949	0.0460664	1.11525	1.03605	0.926266	1.74535
hsa-miR-24	1413.48	4208.24	2152.02	243.968	18179.1	645.688	2082.25	15214.3
hsa-miR-24-1star	8.55516	17.1021	8.6962	0.299432	98.3989	2.18721	5.00184	5.94508
hsa-miR-24-2star	8.55516	19.345	8.6962	0.921328	103.718	2.0721	5.74285	21.9259
hsa-miR-25	590.932	276.157	398.286	288.237	510.868	175.553	396.071	482.233
hsa-miR-25star	27.9608	9.32205	8.11645	3.45498	7.12041	1.72675	5.18709	8.69945
hsa-miR-26a	647.688	569.346	527.376	192.511	2646.22	336.715	886.622	863.837
hsa-miR-26a-1star	3.3386	0.770997	0.966244	0.437631	0.943669	0.115116	0.741013	0.354523
hsa-miR-26a-2star	1.46064	0.630815	1.35274	0.414598	2.83101	0.460466	1.11152	0.818131
hsa-miR-26b	30.0474	61.8199	79.232	11.1941	317.931	46.1617	144.868	82.4948
hsa-miR-26bstar	0.417325	0.630815	1.54599	0.138199	1.80155	0.690698	0.926266	1.14538
hsa-miR-27a	138.76	209.711	172.378	16.9985	462.569	65.271	228.047	216.45
hsa-miR-27b	133.544	201.37	167.16	16.3305	446.012	64.3501	224.527	215.114
hsa-miR-27bstar	7.09452	5.25679	5.02447	1.49716	22.7338	1.61163	5.37234	34.716
hsa-miR-28-3p	24.2048	26.5643	45.4135	10.7565	54.1323	21.1814	38.1622	94.8486
hsa-miR-28-5p	185.501	93.1504	163.295	67.6715	464.628	90.021	229.899	404.456
hsa-miR-296-3p	41.7325	21.8683	25.5088	4.05384	4.88992	1.61163	3.33456	0.136355
hsa-miR-299-3p	0.417325	0.841087	0.193249	4.26114	0	0	0	7.77224
hsa-miR-299-5p	1.6693	23.4103	4.83122	34.0661	3.86046	0.345349	0.185253	79.1405
hsa-miR-29a	196.769	7694.69	1704.07	80.0864	496.198	270.524	1216.74	288.636
hsa-miR-29astar	1.04331	21.1674	6.95696	0.322465	2.23049	0.920931	5.74285	2.39985
hsa-miR-29b	218.052	3595.37	1047.99	62.3969	188.734	194.547	565.393	437.836
hsa-miR-29b-1star	2.08662	3.43444	0.966244	0.276398	1.4584	0	0.741013	0.218168
hsa-miR-29b-2star	0.625987	1.61208	0.579746	0.161232	4.63256	1.95698	0.926266	3.89976
hsa-miR-29c	297.135	8810.53	2096.75	99.181	403.376	301.145	1226.01	514.086
hsa-miR-29cstar	2.08662	5.32689	4.25147	0.322465	10.5519	2.99303	14.4497	7.96314
hsa-miR-300	0	0.0700906	0	0.0460664	0.171576	0.230233	0.185253	0.054542
hsa-miR-301a	557.755	291.367	534.913	253.734	1646.53	373.553	729.712	4010.26
hsa-miR-301b	208.871	72.8241	150.541	23.5399	529.484	105.677	203.778	826.421
hsa-miR-302a	32460.6	13588.8	21282.3	10794.7	22.8196	28.0884	30.3815	47.3152
hsa-miR-302astar	3661.61	1303.19	1879.15	1049.81	9.77984	7.0221	14.2645	4.36336
hsa-miR-302b	32503.5	13570.5	21260.1	10858.7	22.9912	28.0884	30.3815	47.5334
hsa-miR-302bstar	250.395	92.029	212.574	99.2961	0.171576	0.115116	0	0.354523
hsa-miR-302c	32400.7	13582.9	21279.8	11026.5	22.5623	28.3186	30.3815	48.4606
hsa-miR-302cstar	219.721	121.958	154.599	128.111	0.0857881	0	0.370506	0.490878
hsa-miR-302d	32444.3	13614.3	21316.1	11144.1	23.4201	28.7791	30.9373	49.1424
hsa-miR-302dstar	362.655	258.424	350.553	214.739	0.42894	0.805815	0.370506	0.654504
hsa-miR-302e	28226.2	189.595	18613	13.9121	1.02946	1.15116	27.047	0
hsa-miR-302f	10.4331	3.64471	10.0489	11.079	0	0	0	0.0818131
hsa-miR-30a	296.301	290.876	396.547	66.9114	739.064	596.418	979.804	3034.96
hsa-miR-30astar	29.4214	27.4054	31.8861	14.3266	57.478	75.171	72.9898	17.0444
hsa-miR-30b	481.801	244.897	377.415	189.747	1047.64	350.76	992.587	1526.66
hsa-miR-30bstar	0.625987	1.33172	0.772995	0.230332	1.54419	2.87791	2.22304	0.572691
hsa-miR-30c	484.514	245.457	377.415	191.475	1049.36	351.22	996.477	1544.03
hsa-miR-30c-1star	1.87796	0.210272	0.193249	0.115166	0.42894	0.115116	1.85253	0.845402
hsa-miR-30c-2star	0.625987	0.280362	0	0.0230332	1.20103	1.3814	2.7788	2.99981
hsa-miR-30d	196.143	168.077	239.629	24.4152	715.301	419.024	723.228	1731
hsa-miR-30dstar	0.208662	0.280362	0.386498	0.161232	0.257364	0.230233	0.741013	0.79086
hsa-miR-30e	253.316	239.429	321.759	86.2363	441.38	453.444	714.707	1999.07
hsa-miR-30estar	29.4214	27.4054	32.2726	14.6491	57.7354	75.2861	72.8045	17.3716
hsa-miR-31	807.315	2372.43	695.116	74.1669	3282.42	132.844	397.739	177.916
hsa-miR-31star	42.5671	137.658	51.4042	4.51451	98.1416	11.3965	21.8599	23.2076
hsa-miR-32	16.9017	14.5788	21.4506	6.42626	6.94884	8.28838	22.4156	24.7075
hsa-miR-320a	180.91	137.938	172.571	23.0793	1006.47	119.376	410.151	308.653
hsa-miR-320b	180.91	137.588	172.378	22.4804	1004.15	118.225	409.039	301.754
hsa-miR-320c	183.623	137.307	171.991	21.9967	1001.83	117.764	407.372	295.945
hsa-miR-320d	183.414	136.326	176.823	21.8815	997.63	117.304	418.487	294.091
hsa-miR-323-3p	1.04331	5.67734	1.35274	41.2985	5.83359	1.3814	3.89032	245.712
hsa-miR-323-5p	0	0	0	0.230332	0	0	0	0.599962
hsa-miR-324-3p	4.59057	0.490634	5.99071	0.161232	11.1525	4.95001	13.5235	0
hsa-miR-324-5p	6.05121	20.887	24.3494	1.98086	72.8341	31.4268	68.3584	56.2056
hsa-miR-326	29.4214	6.44833	20.4844	1.33593	79.8687	5.18024	5.9281	7.11774
hsa-miR-328	1.04331	10.9341	5.02447	0.115166	14.3266	5.75582	13.894	2.34531
hsa-miR-329	0	0	0	10.7335	0.514729	0.690698	0.55576	40.552
hsa-miR-32star	9.80713	2.94381	8.3097	3.40891	4.2894	2.64768	4.07557	5.01787
hsa-miR-330-3p	6.05121	11.1444	21.2574	3.22465	39.8915	4.02907	9.44791	12.0538
hsa-miR-330-5p	0.625987	0.560725	0	0.253365	0.42894	0.345349	0.370506	0.299981
hsa-miR-331-3p	282.946	61.1891	105.321	48.2776	487.534	68.7245	173.767	594.426
hsa-miR-331-5p	7.92917	5.1867	10.2422	0.64493	6.09095	1.72675	3.89032	2.69983
hsa-miR-335	17.1103	5.32689	7.5367	10.411	310.124	0.115116	19.8221	47.9425
hsa-miR-335star	14.815	9.04169	18.1654	13.152	53.1028	0.230233	24.0829	11.8356
hsa-miR-337-3p	0.417325	19.8356	3.28523	10.7795	0.42894	0.230233	0	23.944
hsa-miR-337-5p	0	0	0	4.16901	0.257364	0.115116	0.185253	18.4898
hsa-miR-338-3p	2.71261	4.4858	8.6962	1.17469	19.2165	14.5047	53.3529	17.9989
hsa-miR-339-3p	3.54726	7.14924	12.3679	1.77356	9.17933	1.84186	8.7069	18.5443
hsa-miR-339-5p	66.3546	23.9009	60.4869	15.962	78.3245	18.9942	34.8276	103.957
hsa-miR-33a	24.6222	8.41087	25.3156	3.06342	3.94625	8.05815	24.4534	50.9968
hsa-miR-33astar	24.4135	20.887	42.9012	9.16721	40.063	18.4186	49.4626	76.7406
hsa-miR-33b	10.4331	0.560725	1.15949	0.437631	0.943669	1.95698	3.1493	3.16344
hsa-miR-33bstar	16.067	1.12145	0.193249	3.10948	2.31628	0.115116	0.370506	3.05435
hsa-miR-340	5.21656	10.3734	25.5088	2.28029	8.49302	28.5489	73.916	22.1441
hsa-miR-340star	5.84255	9.74259	11.7882	7.62399	28.1385	12.893	31.1225	77.9406
hsa-miR-342-3p	34.8466	53.8997	106.287	23.4017	445.755	118.57	343.645	290.273
hsa-miR-342-5p	0.834649	3.08399	3.67173	0.760096	8.32144	2.76279	5.74285	7.66316
hsa-miR-345	36.5159	19.6254	48.8919	10.6874	98.6563	54.3349	101.148	175.789
hsa-miR-346	0.417325	0.140181	0	0.0690996	0.257364	1.03605	0.185253	1.58172
hsa-miR-34a	453.632	916.224	628.445	97.7759	474.665	198.23	866.244	265.783
hsa-miR-34astar	30.4647	34.6948	39.0363	9.23631	22.5623	7.13722	24.8239	34.8251
hsa-miR-34b	4.17325	26.7045	15.4599	0.345498	1.20103	1.15116	0.926266	3.43615
hsa-miR-34bstar	39.2285	40.232	65.1249	3.86958	11.753	8.4035	10.0037	5.97235
hsa-miR-34c-3p	2.29529	18.7843	8.50295	0.207299	0.343152	1.26628	0.926266	1.28174
hsa-miR-34c-5p	54.0436	377.718	207.163	5.66617	12.6108	12.2023	15.376	45.2972
hsa-miR-361-3p	55.5042	14.7891	19.3249	4.53754	91.7075	10.2454	47.6101	39.3248
hsa-miR-361-5p	83.2563	37.6387	60.8734	15.271	117.53	31.657	110.781	49.8242
hsa-miR-362-3p	84.2996	16.1208	18.3586	11.9082	426.624	14.6198	23.5272	42.8428
hsa-miR-362-5p	21.0749	15.4199	11.5949	2.34939	238.834	5.75582	15.7465	7.5268
hsa-miR-363	450.919	95.954	319.44	157.685	4.88992	66.9977	336.976	339.879
hsa-miR-363star	3.75592	1.54199	4.63797	1.26683	0.772093	4.71977	6.11335	4.19974
hsa-miR-365	28.1694	55.5118	31.3063	4.28417	46.5829	5.18024	17.5991	21.435
hsa-miR-367	1037.89	653.735	1083.74	320.737	1.4584	0.805815	0.926266	1.6908
hsa-miR-367star	10.8504	1.40181	5.21772	0.345498	0	0	0	0
hsa-miR-369-3p	0	1.4719	0.966244	0.714029	0.0857881	0	0.370506	3.02708
hsa-miR-369-5p	0	20.6767	4.63797	8.95991	0.42894	0	0.370506	27.5983
hsa-miR-370	0	3.85498	0.193249	11.6778	0.686305	0.805815	0.55576	54.2693
hsa-miR-371-3p	203.237	12.406	5.79746	3.43195	0.257364	0	0	0
hsa-miR-371-5p	18409.9	1871.49	458.193	280.222	4.80413	4.37442	5.00184	0.899944
hsa-miR-372	2876.2	164.783	64.7384	45.7209	0.42894	0.230233	0.185253	0.109084
hsa-miR-373	6849.13	1106.24	219.724	282.594	3.17416	2.64768	2.7788	0.709046
hsa-miR-373star	217.635	15.2097	4.25147	2.41849	0.0857881	0.575582	0.185253	0.054542
hsa-miR-374a	23.7875	25.7232	36.524	14.9025	99.6	9.32443	62.2451	34.6887
hsa-miR-374b	78.0397	89.716	113.824	34.9644	165.314	33.0384	208.966	83.7766
hsa-miR-374bstar	29.0041	57.7547	52.3704	22.3652	118.044	13.2384	134.309	53.6148
hsa-miR-375	10.2245	3.43444	9.27594	0	0.343152	0.115116	0.185253	0.027271
hsa-miR-376a	6.46853	28.6671	4.83122	127.258	9.77984	2.53256	5.18709	250.702
hsa-miR-376astar	0	3.78489	1.15949	1.38199	0.686305	0.115116	0.55576	12.0538
hsa-miR-376b	3.12994	1.40181	0.579746	70.9192	3.00258	0.805815	0.185253	102.403
hsa-miR-376c	4.59057	6.23806	1.54599	92.939	7.03462	1.84186	4.81658	229.24
hsa-miR-377star	0.417325	0.490634	0.193249	0.967394	0.857881	0.345349	0	1.39082
hsa-miR-378	426.923	221.346	211.221	61.1762	490.45	16.1163	24.0829	15.7354
hsa-miR-378star	53.8349	19.7655	17.1991	5.2746	10.2946	2.30233	4.07557	2.918
hsa-miR-379	0.417325	77.5202	13.3342	12.7374	0.857881	0.690698	0.741013	33.3797
hsa-miR-379star	0.208662	9.60241	1.54599	11.77	0.257364	0	0	14.3718
hsa-miR-380	0.208662	2.94381	0.579746	13.4284	0.514729	0	0	22.5804
hsa-miR-380star	0	2.10272	0.193249	0.207299	0.171576	0.115116	0	0.899944
hsa-miR-381	1.87796	19.6955	3.86498	32.8453	2.1447	0.345349	0.741013	30.5435
hsa-miR-382	0.208662	66.1655	11.0152	20.7068	3.77468	0.690698	1.29677	104.666
hsa-miR-409-3p	2.92127	60.1377	8.3097	274.878	11.4956	2.30233	2.59354	754.344
hsa-miR-409-5p	0.208662	9.95286	1.93249	9.60484	0.772093	0	0.185253	22.0077
hsa-miR-410	0	5.74743	1.35274	2.74095	0.514729	0.115116	0	7.41772
hsa-miR-411	0.417325	21.3776	9.27594	12.6683	0.943669	0.115116	0.185253	38.3976
hsa-miR-411star	0	14.0882	2.31899	14.9716	0.257364	0	0	18.8443
hsa-miR-412	0	0.490634	0.193249	0.207299	0	0.115116	0	1.66353
hsa-miR-421	187.17	430.216	441.574	94.1136	162.397	174.171	414.967	408.22
hsa-miR-423-3p	162.965	51.1661	67.2506	9.21328	156.821	36.9524	84.846	56.0692
hsa-miR-423-5p	14.3977	9.6725	11.5949	2.71792	26.0796	9.55466	30.5668	6.54504
hsa-miR-424	44.8624	37.3583	135.274	8.45318	163.512	8.28838	96.7022	136.982
hsa-miR-424star	7.92917	0.210272	7.34345	0.460664	38.0899	1.15116	9.63317	0.436336
hsa-miR-425	113.304	155.601	230.546	70.9192	145.153	61.4722	153.76	169.053
hsa-miR-425star	4.17325	15.5601	23.5764	3.59318	18.1013	7.94303	20.1926	12.3265
hsa-miR-429	3.96458	1.05136	2.70548	1.10559	0.0857881	0.115116	0.185253	0.027271
hsa-miR-431	0.208662	20.1861	6.37721	7.23242	0.257364	0	0	4.9906
hsa-miR-431star	0	1.82236	0.193249	2.92522	0.0857881	0	0	11.8902
hsa-miR-432	0	0	0	1.40503	0.0857881	0	0	5.69964
hsa-miR-432star	0	0.0700906	0	0.667963	0	0.575582	0.370506	1.58172
hsa-miR-433	0	28.8773	1.93249	1.19773	0.257364	0.115116	0	13.1719
hsa-miR-448	2.29529	2.17281	4.05823	0.460664	0.0857881	0.460466	0	0.299981
hsa-miR-449b	1.04331	0.630815	0.386498	0.115166	0.0857881	27.5128	0.185253	4.33609
hsa-miR-450a	3.12994	1.12145	3.09198	0.529764	44.8672	1.15116	10.1889	5.42693
hsa-miR-450b-5p	1.04331	0	0.966244	0.184266	10.123	0.230233	3.51981	2.23622
hsa-miR-452	3.12994	3.92507	2.51223	0.990428	13.3829	4.60466	10.0037	9.19033
hsa-miR-452star	0.625987	0.280362	0.193249	0.115166	2.1447	0.345349	0	0.327252
hsa-miR-453	0	0.140181	0.193249	0.184266	0	0.345349	0.185253	1.44536
hsa-miR-454	4.79923	6.30815	11.0152	0.207299	10.3804	8.05815	19.8221	10.3357
hsa-miR-454star	2.50395	4.69607	4.63797	1.12863	8.14987	4.48954	6.48386	11.9992
hsa-miR-455-3p	102.662	57.5444	91.2134	37.0374	529.141	38.4489	99.6662	834.084
hsa-miR-455-5p	11.6851	5.67734	15.2667	1.88872	12.6966	3.22326	7.59538	18.3807
hsa-miR-483-3p	2.08662	0.911178	2.12574	0	642.124	1.84186	4.81658	2.04533
hsa-miR-483-5p	0.417325	0.280362	0.966244	0.0690996	116.586	4.02907	4.44608	0.299981
hsa-miR-484	159.001	169.9	259.92	51.5944	372.921	97.3885	219.896	379.503
hsa-miR-485-3p	0.208662	2.17281	0.386498	4.39934	0.42894	0.115116	0.185253	7.30863
hsa-miR-486-3p	7.92917	4.20544	6.37721	1.22076	2.23049	0.690698	4.44608	1.00903
hsa-miR-486-5p	7.92917	4.20544	6.37721	1.19773	2.23049	0.805815	4.44608	0.981757
hsa-miR-487a	0	0.0700906	0	37.7744	0.857881	0.575582	0.741013	70.9865
hsa-miR-487b	0.834649	7.56978	1.35274	46.0894	3.34574	0.805815	2.7788	163.108
hsa-miR-488	0	0.140181	0.386498	0	0.0857881	0.460466	1.29677	0.245439
hsa-miR-489	29.0041	14.7891	88.7012	6.81783	0	1.49651	4.44608	5.89054
hsa-miR-490-3p	0.208662	0.210272	0	0.0230332	0.257364	2.76279	5.18709	0.845402
hsa-miR-490-5p	0.208662	0.0700906	0.193249	0.0230332	0.257364	0.690698	0.926266	0.0818131
hsa-miR-491-3p	1.25197	0.630815	1.35274	0.230332	0.772093	0.230233	0.370506	1.11811
hsa-miR-491-5p	0.834649	0.630815	1.35274	0.276398	2.40207	1.72675	2.96405	1.82716
hsa-miR-493	0.417325	0.210272	0.193249	1.52019	0.257364	2.18721	0.741013	0.79086
hsa-miR-493star	0.208662	1.12145	0	9.88124	0.343152	0.230233	0	20.1533
hsa-miR-494	4.38191	35.0453	2.89873	175.098	8.32144	0.920931	2.7788	327.225
hsa-miR-495	1.46064	22.3589	3.09198	39.3868	2.74522	1.72675	1.29677	110.693
hsa-miR-496	0	9.32205	4.25147	0.737062	0.600517	0	0.370506	11.372
hsa-miR-497	3.3386	7.99033	5.99071	0.552797	1.20103	0.575582	1.48203	1.93624
hsa-miR-497star	1.6693	3.43444	0.966244	0.230332	0.0857881	0.115116	0.370506	0.54542
hsa-miR-498	77.8311	16.8217	17.5856	3.96171	0.0857881	0.230233	0.185253	0.027271
hsa-miR-499-5p	1.04331	0.630815	0	0.0921328	2.05891	1.03605	2.7788	0.327252
hsa-miR-500	9.38981	2.10272	4.83122	0.944361	100.286	2.99303	5.00184	2.89073
hsa-miR-500star	34.2206	11.4248	11.9814	2.28029	329.855	7.59768	18.3401	9.7903
hsa-miR-501-3p	24.2048	6.09788	7.72995	1.75052	222.449	5.6407	15.0055	6.13598
hsa-miR-501-5p	8.97248	5.88761	6.37721	1.24379	165.399	3.79884	5.5576	7.63589
hsa-miR-502-3p	35.0553	12.1257	12.1747	2.34939	334.574	7.48257	18.8958	9.87211
hsa-miR-502-5p	4.79923	1.12145	0.772995	0.437631	43.4088	1.03605	1.66728	0.299981
hsa-miR-503	21.7009	23.1299	76.5265	1.75052	107.235	2.99303	51.8709	24.9803
hsa-miR-504	11.0591	2.87371	23.5764	2.53365	1.97313	9.43955	21.1189	11.7538
hsa-miR-505	64.6853	36.8677	59.3274	20.6838	59.108	32.0024	96.8874	73.6863
hsa-miR-505star	6.88586	2.87371	11.4017	2.87915	5.31886	3.91396	5.00184	9.27215
hsa-miR-512-3p	1289.95	130.789	129.09	24.5304	0.514729	1.3814	0.926266	0.054542
hsa-miR-512-5p	1422.66	127.004	143.197	62.7424	0.686305	0.575582	1.29677	0.109084
hsa-miR-514	0	0.841087	1.15949	0.0921328	0.257364	0.345349	0.185253	0.027271
hsa-miR-515-3p	944.823	93.4308	102.422	76.9078	0.343152	0.575582	0.370506	0.190897
hsa-miR-515-5p	91.8114	4.13535	3.67173	3.57015	0	0.115116	0.370506	0.027271
hsa-miR-516b	168.808	8.55105	13.7207	11.4475	0.171576	0.115116	0	0
hsa-miR-517a	2764.78	276.718	280.597	67.0957	0.42894	1.3814	1.85253	0.299981
hsa-miR-517b	2533.16	258.424	257.987	52.7	0.42894	1.3814	1.66728	0.27271
hsa-miR-517c	2233.94	266.344	241.175	74.1208	0.343152	0.805815	1.66728	0.490878
hsa-miR-517star	177.989	16.8918	13.1409	13.4514	0.0857881	0.345349	0	0
hsa-miR-518a-3p	111.426	6.65861	7.34345	1.38199	0	0.575582	0	0.027271
hsa-miR-518b	272.304	31.5408	42.3215	3.50105	0.0857881	0.115116	0	0.027271
hsa-miR-518c	708.826	48.5027	81.551	20.0849	0.171576	0	0.185253	0.0818131
hsa-miR-518cstar	123.319	13.4574	11.7882	5.64313	0.343152	0.920931	0.370506	0
hsa-miR-518d-3p	153.993	11.2145	16.0397	3.38588	0.0857881	0.345349	0	0.027271
hsa-miR-518d-5p	577.786	57.8247	49.6649	6.65659	0.257364	0.575582	0.55576	0
hsa-miR-518e	343.041	17.4526	18.1654	3.77744	0.0857881	0.345349	0	0
hsa-miR-518estar	162.757	13.948	16.2329	5.52797	0	0	0.185253	0
hsa-miR-518f	461.978	19.4151	57.2016	19.6473	0.0857881	0	0.185253	0.054542
hsa-miR-518fstar	577.786	57.7547	49.6649	7.50882	0.257364	0.460466	0.55576	0
hsa-miR-519a	1365.07	187.703	153.826	56.201	0.171576	0.575582	0.926266	0.463607
hsa-miR-519astar	162.757	13.948	16.2329	5.52797	0	0	0.185253	0
hsa-miR-519b-3p	1519.69	212.655	171.798	57.6521	0.257364	0.575582	0.741013	0.463607
hsa-miR-519b-5p	162.757	13.948	16.2329	5.52797	0	0	0.185253	0
hsa-miR-519c-3p	300.682	60.9087	48.6987	14.2575	0	0.230233	0	0.027271
hsa-miR-519c-5p	162.757	13.948	16.2329	5.52797	0	0	0.185253	0
hsa-miR-519d	1227.35	112.846	128.51	36.5767	0.772093	0.575582	0.741013	0.109084
hsa-miR-519e	656.869	112.776	86.962	22.2731	0.0857881	0.345349	0.55576	0.354523
hsa-miR-519estar	113.095	4.4858	10.6287	7.85432	0.0857881	0.575582	0.185253	0.027271
hsa-miR-520a-5p	124.154	3.43444	5.79746	4.56057	0.171576	0	0.185253	0.054542
hsa-miR-520b	2065.34	279.732	217.405	37.0143	0.600517	0.805815	1.29677	0.0818131
hsa-miR-520c-3p	2068.26	280.432	217.405	37.1065	0.600517	0.805815	1.29677	0.0818131
hsa-miR-520c-5p	577.786	57.8247	49.6649	6.65659	0.257364	0.575582	0.55576	0
hsa-miR-520d-3p	28.5867	4.69607	4.63797	1.58929	0.0857881	0	0	0
hsa-miR-520d-5p	219.513	13.4574	15.6532	7.18636	0.600517	3.79884	1.11152	0.0818131
hsa-miR-520e	736.787	98.3371	81.551	11.102	0.0857881	0.230233	0.185253	0.0818131
hsa-miR-520f	1179.36	142.634	118.655	31.7167	0.42894	0.575582	0.55576	0.0818131
hsa-miR-520g	2519.39	118.944	290.066	37.8666	0.514729	1.15116	1.29677	0.0818131
hsa-miR-520h	1427.04	149.153	152.473	37.1525	0.343152	0.575582	0.55576	0.054542
hsa-miR-521	417.951	43.5263	43.481	6.90996	0.171576	0.115116	0.55576	0.109084
hsa-miR-522	322.175	35.5359	32.4658	0.667963	0	0.230233	0.185253	0
hsa-miR-522star	162.757	13.948	16.2329	5.52797	0	0	0.185253	0
hsa-miR-523	75.9531	3.50453	6.57046	2.21119	0	0	0	0.027271
hsa-miR-523star	162.757	13.948	16.2329	5.52797	0	0	0.185253	0
hsa-miR-524-3p	121.65	25.6532	30.5333	4.76787	0.257364	3.68373	1.11152	0.218168
hsa-miR-524-5p	836.11	75.4876	67.0573	5.59707	0.343152	0.345349	0.55576	0
hsa-miR-525-5p	113.93	7.85015	19.9046	5.04427	0.171576	0.230233	0.370506	0.027271
hsa-miR-526a	577.786	57.8247	49.6649	6.65659	0.257364	0.575582	0.55576	0
hsa-miR-526b	161.713	18.6441	17.1991	10.9868	0.343152	0.230233	0.185253	0
hsa-miR-526bstar	2066.38	279.732	218.178	35.0335	0.600517	1.03605	1.29677	0.054542
hsa-miR-532-3p	13.1457	4.55589	7.9232	1.05953	197.227	3.91396	7.59538	6.43596
hsa-miR-532-5p	136.674	85.861	79.6185	21.536	2340.81	39.7152	83.3639	131.61
hsa-miR-539	0	3.36435	0.193249	2.53365	0.514729	0.115116	0.55576	14.3718
hsa-miR-541star	0.208662	0.140181	0.193249	0.0230332	0.514729	0.230233	0.370506	0.245439
hsa-miR-542-3p	7.72051	6.58852	7.34345	3.01735	181.442	4.14419	27.2322	37.1431
hsa-miR-542-5p	3.12994	4.34562	5.79746	0.368531	47.1834	1.15116	11.3004	7.44499
hsa-miR-543	2.08662	8.69123	1.54599	17.344	0.514729	0.690698	0.741013	43.3609
hsa-miR-544	0	0.560725	0.193249	0.829195	0.171576	0.345349	0.185253	2.5362
hsa-miR-545	52.3743	14.7891	23.1899	3.06342	6.51989	9.66978	20.7484	28.1982
hsa-miR-545star	35.4726	3.43444	9.85569	7.62399	15.0987	2.99303	6.11335	44.2609
hsa-miR-548b-3p	4.59057	0.700906	4.63797	0.852228	0	0.690698	2.59354	3.1089
hsa-miR-548b-5p	11.0591	5.25679	4.63797	2.37242	4.37519	2.76279	3.51981	7.5268
hsa-miR-548c-5p	3.3386	1.4719	2.89873	0.598863	1.97313	1.15116	3.89032	4.55426
hsa-miR-548d-3p	0	0.0700906	1.54599	0.0230332	0.343152	0.230233	0.55576	0.163626
hsa-miR-548d-5p	11.8938	5.53716	5.21772	2.62578	4.46098	2.99303	3.33456	8.07222
hsa-miR-548e	0.208662	0	0	0.0460664	0.0857881	0	0	0.136355
hsa-miR-548g	4.79923	3.64471	1.35274	1.63536	0.42894	0	0.370506	0.027271
hsa-miR-548l	0.417325	0.140181	0	0.0460664	0.171576	0.230233	0	0.109084
hsa-miR-548n	8.76382	4.06525	4.05823	0.0230332	3.08837	1.84186	2.7788	0.436336
hsa-miR-548o	0.625987	0.350453	0.772995	0.161232	0.514729	0.345349	1.85253	0.354523
hsa-miR-548p	0.834649	0.280362	0.772995	0.0921328	0.0857881	0.460466	2.03778	0.327252
hsa-miR-549	0.834649	2.59335	2.31899	0.0230332	0.343152	0.345349	1.11152	0.490878
hsa-miR-550	7.72051	4.34562	7.9232	4.14598	6.17674	3.45349	15.376	14.1537
hsa-miR-550star	8.76382	5.11661	8.6962	4.88304	6.51989	4.60466	16.4875	15.7899
hsa-miR-551a	14.6064	23.6205	47.7325	16.6991	53.9607	18.5337	29.27	53.533
hsa-miR-551b	5.63388	17.3124	20.0979	7.23242	2.91679	86.1071	178.028	309.908
hsa-miR-551bstar	0.417325	0.280362	1.35274	0.760096	0.257364	0.345349	4.26082	17.9716
hsa-miR-556-3p	1.04331	0.140181	1.15949	0.184266	0.0857881	0.575582	1.48203	0.981757
hsa-miR-561	27.7521	7.07915	6.37721	5.7583	0.171576	1.84186	2.59354	5.07241
hsa-miR-574-3p	11.0591	60.8386	81.9375	10.0425	1133.43	40.0605	110.411	359.514
hsa-miR-576-3p	1.25197	0.140181	0.579746	0.0921328	1.02946	0.115116	1.66728	0.518149
hsa-miR-576-5p	2.71261	1.33172	1.93249	0.161232	1.20103	1.49651	2.59354	1.0363
hsa-miR-577	3.75592	5.32689	1.54599	0.875262	0.171576	1.03605	0.55576	1.44536
hsa-miR-579	0.417325	1.19154	0.772995	0.414598	0.42894	0.690698	0.741013	1.90897
hsa-miR-582-3p	4.79923	9.46223	3.67173	0.161232	12.2677	5.75582	9.81842	5.836
hsa-miR-582-5p	5.84255	7.70997	3.67173	0.207299	13.7261	5.98605	11.671	7.25409
hsa-miR-584	0	0.140181	0.193249	0.0230332	0.772093	1.26628	0	2.56348
hsa-miR-585	0	0.0700906	0.193249	0.0230332	2.31628	0.575582	0.185253	0.0818131
hsa-miR-587	0	0	0.193249	0	0	0	0	0
hsa-miR-589	21.9095	8.62114	19.3249	1.38199	15.4419	4.37442	7.41013	4.58153
hsa-miR-589star	11.8938	6.79879	8.3097	2.32635	3.08837	2.18721	4.63133	8.69945
hsa-miR-590-3p	9.59847	9.39214	11.5949	2.51062	6.34832	5.75582	14.8203	18.3534
hsa-miR-590-5p	135.005	257.443	310.164	47.5636	57.7354	141.133	179.881	353.269
hsa-miR-592	0.625987	3.08399	2.89873	1.65839	0.257364	8.86396	2.59354	2.5362
hsa-miR-597	0.834649	0.981268	0.966244	0.276398	0.514729	0.805815	1.11152	2.42712
hsa-miR-598	3.3386	11.0042	16.4261	3.38588	20.4176	19.2244	54.2792	23.5622
hsa-miR-599	0.417325	0	0	0.0460664	0	0	0.55576	0
hsa-miR-602	0	0	0.193249	0.115166	0.171576	0	0.370506	0.490878
hsa-miR-605	0.417325	0.0700906	0	0.0230332	0.343152	0	0.185253	0.027271
hsa-miR-610	0.417325	0.140181	0	0.0230332	0.42894	0.115116	0	0.109084
hsa-miR-615-3p	0.417325	3.92507	0.579746	0	37.661	2.41744	8.89215	0.299981
hsa-miR-616	0.208662	0	0.193249	0.0230332	0.171576	0.230233	0.55576	0.0818131
hsa-miR-618	0.625987	0.560725	0.579746	0.483697	0.0857881	1.15116	1.48203	1.55445
hsa-miR-624star	1.6693	0.280362	0.772995	0.138199	0.600517	0.115116	0.926266	0.763589
hsa-miR-625	17.945	20.3964	25.1223	4.12294	29.94	12.6628	49.4626	42.161
hsa-miR-625star	18.1536	20.6066	25.3156	4.12294	30.1116	12.7779	49.8331	42.4337
hsa-miR-627	1.87796	0.700906	0.579746	0.276398	2.57364	1.26628	0.926266	1.6908
hsa-miR-628-3p	0.834649	0.210272	1.15949	0.0690996	0.686305	0.920931	0.926266	0.736318
hsa-miR-628-5p	1.04331	1.33172	1.15949	0.368531	5.40465	3.91396	11.1152	10.1721
hsa-miR-629	19.1969	5.81752	12.5612	5.18247	9.60827	2.41744	5.18709	14.5355
hsa-miR-629star	16.9017	4.90634	10.6287	2.62578	8.32144	2.18721	4.07557	10.6357
hsa-miR-636	1.04331	0.280362	1.35274	0.138199	0.257364	0.115116	0.55576	1.17265
hsa-miR-641	9.59847	3.78489	5.99071	3.68531	3.43152	0.920931	3.70506	5.56329
hsa-miR-642	0.417325	0.140181	0.193249	0.0690996	1.71576	0.575582	0.370506	0.654504
hsa-miR-643	0.834649	0.350453	0.579746	0.690996	0.514729	0.575582	0.185253	0.927215
hsa-miR-652	0.834649	7.14924	0.966244	0.184266	0.772093	0.575582	3.89032	0.299981
hsa-miR-654-3p	0.834649	0.140181	0	24.968	4.54677	1.15116	1.11152	56.2056
hsa-miR-654-5p	0	0	0	0.184266	0.0857881	0.115116	0.185253	0.763589
hsa-miR-655	0	0	0.193249	1.01346	0	0.115116	0.185253	1.14538
hsa-miR-656	0.208662	0.0700906	0	1.93479	0	0	0.185253	6.19052
hsa-miR-659	0	0	0.193249	0.0230332	0.171576	0.690698	0.185253	0.054542
hsa-miR-660	291.919	68.3383	147.642	25.9814	3765.58	79.3152	150.981	62.6961
hsa-miR-664	3.12994	2.73353	5.02447	0.667963	17.3292	3.68373	7.41013	6.08144
hsa-miR-664star	0	0.490634	0.386498	0.0690996	1.62997	0.460466	0.185253	0.054542
hsa-miR-665	18.1536	10.4435	3.09198	2.99432	4.2894	11.1663	6.11335	9.54486
hsa-miR-668	0	3.64471	0.579746	0.115166	0.0857881	0.345349	0	1.2272
hsa-miR-671-3p	2.29529	2.45317	1.73924	0.921328	7.54935	1.49651	4.81658	1.82716
hsa-miR-671-5p	21.2836	53.409	49.0852	5.02124	53.8749	18.9942	48.5363	36.1341
hsa-miR-7	200.942	23.971	28.4076	32.2234	15.6134	56.1768	160.615	41.2338
hsa-miR-708	34.4293	32.0314	48.6987	6.95603	136.317	100.036	63.9123	93.7578
hsa-miR-708star	63.4334	29.8586	62.8059	1.79659	187.533	48.1187	102.816	10.8266
hsa-miR-7-1star	68.2326	29.8586	37.297	13.866	41.0067	26.3617	66.5059	55.0875
hsa-miR-720	29.8387	34.1341	40.0025	3.22465	9.09354	2.99303	10.3742	7.44499
hsa-miR-7-2star	17.5276	1.19154	0.772995	0.483697	1.37261	2.53256	11.1152	4.03611
hsa-miR-744	75.7444	41.9142	52.1772	11.4475	81.756	20.4907	72.0635	94.4395
hsa-miR-744star	8.76382	5.67734	7.34345	2.41849	15.8708	3.45349	9.26266	20.9441
hsa-miR-758	0	0.350453	0	1.65839	0.343152	0	0.370506	5.09968
hsa-miR-760	1.25197	0.700906	2.12574	0.161232	1.62997	1.3814	3.89032	4.88151
hsa-miR-765	0	0.280362	0.193249	0.0460664	0.600517	2.18721	1.29677	0
hsa-miR-766	34.2206	16.1208	9.85569	2.71792	118.13	10.7058	22.2304	26.5892
hsa-miR-767-3p	0.208662	0.0700906	0	0.161232	0	0.115116	0	0.0818131
hsa-miR-767-5p	4.17325	3.92507	0.579746	9.92731	0	2.0721	1.85253	3.08163
hsa-miR-769-3p	1.04331	1.19154	5.60422	0.783129	3.43152	1.84186	7.59538	6.10871
hsa-miR-769-5p	17.1103	12.2659	32.8523	7.64702	22.2191	11.7419	30.1963	52.9603
hsa-miR-770-5p	0.208662	0	0	2.57972	0	0.115116	0	9.46304
hsa-miR-873	9.59847	14.719	12.3679	2.71792	1.80155	16.807	33.5308	18.2716
hsa-miR-874	20.2402	13.4574	16.0397	0.276398	8.32144	4.02907	17.2285	0.54542
hsa-miR-875-5p	0	0.140181	0.386498	0	0.0857881	0	0.185253	0.027271
hsa-miR-876-3p	0	0.420544	0.579746	0.276398	0.0857881	1.03605	1.48203	1.55445
hsa-miR-876-5p	2.71261	2.52326	3.47848	1.10559	0.343152	4.60466	11.3004	4.9906
hsa-miR-877	1.46064	3.22417	6.76371	0.253365	5.83359	3.10814	7.22487	2.64529
hsa-miR-877star	2.71261	4.27553	3.86498	1.17469	7.72093	9.55466	6.48386	3.46342
hsa-miR-885-5p	0.208662	0.280362	0	0.0921328	0.0857881	1.95698	1.29677	0.190897
hsa-miR-886-3p	0.625987	0.770997	134.888	15.939	12.0961	0.460466	8.89215	79.5223
hsa-miR-886-5p	0.417325	1.12145	67.8303	18.0811	8.32144	0.230233	4.26082	108.675
hsa-miR-887	3.3386	12.6163	27.4413	3.59318	173.978	26.8221	82.8082	57.5691
hsa-miR-889	0	0	0	3.98474	0	0	0	4.09065
hsa-miR-891a	0.208662	0.140181	0.966244	0.299432	5.57623	0.345349	1.29677	1.8817
hsa-miR-9	20.6576	15.3498	13.3342	2.97128	34.0579	805.93	3541.67	431.209
hsa-miR-92a	1224.22	483.485	941.315	425.815	484.788	258.436	587.994	353.978
hsa-miR-92a-1star	78.2484	22.7094	30.5333	31.4864	10.7235	3.56861	4.63133	4.96333
hsa-miR-92a-2star	8.34649	1.33172	5.60422	2.44152	0.0857881	0.115116	1.11152	4.49972
hsa-miR-92b	104.749	67.1468	126.385	43.5788	41.3499	142.514	255.094	180.48
hsa-miR-92bstar	15.6497	14.1583	22.6101	5.2055	3.17416	12.5477	41.3115	25.662
hsa-miR-93	2134.41	2356.17	3099.13	226.255	2687.66	1320.62	3293.99	892.39
hsa-miR-935	12.1024	19.345	9.85569	8.84475	5.57623	28.3186	71.8782	169.517
hsa-miR-937	0.834649	0.0700906	0.579746	0	0.514729	0.115116	0.926266	0.54542
hsa-miR-939	0	0.280362	0.386498	0.115166	0.857881	2.18721	0.926266	0.027271
hsa-miR-93star	49.6616	47.942	62.6126	23.8624	88.7049	30.7361	80.3999	74.3135
hsa-miR-940	5.21656	5.04652	16.8126	0.598863	17.7581	7.48257	12.9677	13.7446
hsa-miR-941	0.834649	1.33172	5.99071	0.667963	13.2114	2.41744	6.11335	0.409065
hsa-miR-942	7.92917	0.350453	0.386498	0.115166	0.514729	0.230233	0.370506	0.436336
hsa-miR-943	0	0	0.193249	0	0.0857881	0.115116	0	0.245439
hsa-miR-95	0.417325	1.26163	0.579746	0.64493	1.02946	2.64768	12.9677	2.04533
hsa-miR-96star	16.9017	3.36435	2.12574	6.61053	0.343152	0	0.185253	0.163626
hsa-miR-98	0	2.52326	1.15949	0.0460664	42.9798	2.18721	7.41013	3.19071
hsa-miR-99a	23.3702	297.745	65.5113	20.799	4994.5	1776.48	6384.01	5237.51
hsa-miR-99astar	0.208662	1.82236	0.193249	0.115166	21.7902	19.5698	94.2939	11.9992
hsa-miR-99b	45.6971	227.094	184.746	25.4517	683.903	269.027	533.159	1379.31
hsa-miR-99bstar	10.4331	17.4526	16.0397	3.06342	63.569	27.5128	71.3225	170.826
hsa-miR-9star	6.05121	1.96254	1.93249	1.17469	6.17674	57.328	247.684	188.661

## Sheet: clustered expression
Clustered Expression Data
Name	Cluster	RG7_ESC	RG7_NSC	RG7_NRP	iPS_ESC	iPS_NSC	Brain	Heart	Kidney
chr1:153214804-153214874:+:ESC	1	0	0	0	4.08139	0.599975	0.553112	0	0.306266
chr1:162036709-162036748:-:NSC	1	0.0230332	0	0	0.583055	0.499979	0.237048	0	2.7564
chr1:33500129-33500176:-:NSC	1	0.0230332	0.163626	0	0.174917	1.14995	0.434588	0.0384355	0.673786
chr11:111892102-111892146:-:NSC	1	0.115166	0.0818131	0.0343078	0.291528	0.199992	2.37048	0.269049	2.26637
chr11:112825964-112826009:-:NSC	1	0.0690996	0.245439	0.205847	4.89766	5.54977	12.9191	0.0960888	1.77634
chr11:132430398-132430471:-:NSC	1	0	0	0	28.7446	161.093	122.988	0	54.0866
chr11:91654999-91655034:+:NSC	1	0	0	0	2.099	13.5994	25.0876	0	18.4985
chr12:122061176-122061217:-:ESC	1	0.0690996	0.136355	0.188693	8.4543	2.04991	31.1323	0.17296	43.7961
chr12:96913301-96913346:-:ESC-NSC	1	0.967394	0.79086	1.64678	5.53902	5.49977	3.75326	1.17228	3.12392
chr13:21212045-21212103:+:ESC-NSC	1	3.77744	12.5447	2.23001	41.3969	104.746	8.77077	0.307484	40.4272
chr13:39136180-39136261:-:NSC	1	0.207299	0.136355	0.120077	5.36411	8.54965	12.3265	4.55461	2.20512
chr14:26447699-26447762:+:NSC	1	0.0460664	0.163626	0	0.641361	0.599975	0.19754	0.115307	1.16381
chr14:97941317-97941372:-:NSC	1	0.0921328	0.218168	0.102924	1.80747	3.19987	15.7637	0.230613	6.73786
chr15:39945994-39946030:-:NSC	1	0	0	0	8.4543	23.849	18.7268	0	8.26919
chr15:73841622-73841698:-:ESC	1	0.230332	0.0818131	0.171539	1.63255	1.99992	1.02721	0.403573	0.980052
chr16:7331549-7331590:+:NSC	1	0	0.518149	0	0.0583055	2.69989	14.5784	0.0576533	1.28632
chr17:44004127-44004186:-:NSC	1	0	0	0	2.04069	11.0995	5.25456	0	33.0768
chr18:45906876-45906920:-:NSC	1	0.921328	2.12714	0.548925	2.74036	4.04983	9.60044	0.653404	1.9601
chr18:6364369-6364413:-:NSC	1	0	0	0	1.28272	13.5494	44.9601	0	150.561
chr19:1417545-1417605:+:NSC	1	0.552797	0.327252	0.102924	1.28272	6.74972	1.02721	0.0192178	4.22648
chr19:51904391-51904437:-:NSC	1	0.921328	11.8356	2.84755	18.3079	165.343	99.1255	1.4029	60.1507
chr2:109296468-109296502:-:ESC	1	0	0	0	0.174917	0.0999958	0.118524	0	0.18376
chr2:237634924-237634971:+:ESC-NSC	1	2.46455	2.18168	0.0171539	14.6347	62.2974	81.8605	0.230613	139.719
chr2:79729937-79729982:-:NSC	1	0	0.027271	0	0.0583055	0.24999	0.039508	0.0384355	0.612533
chr20:55329974-55330043:-:NSC	1	0.57583	0.763589	0.497464	2.62375	16.0493	5.72866	0.0576533	3.24642
chr20:56106095-56106156:-:ESC-NSC	1	0	0	0	0.816277	7.1997	35.8732	0	81.1606
chr22:20345298-20345360:+:NSC	1	0	0.027271	0	0.408139	0.349985	0.19754	0	0.122507
chr22:34115896-34115956:+:NSC	1	0.0460664	0.027271	0.0343078	0.583055	1.19995	0.0790159	0.0576533	3.43018
chr3:15512759-15512808:-:NSC	1	0.115166	1.0363	0.78908	1.86578	11.9495	1.77786	0.230613	1.34757
chr4:111213313-111213357:+:NSC	1	0.0460664	0.027271	0	0.174917	0.599975	0.474096	0	1.16381
chr4:175581532-175581581:+:NSC	1	0	0.027271	0	0.174917	0.199992	0.039508	0	0.122507
chr5:11008448-11008483:-:NSC	1	0	0	0	0.757972	4.04983	9.83749	0	4.59399
chr5:165633529-165633574:-:NSC	1	0.921328	2.94527	0.39454	1.22442	1.74993	4.85948	1.32603	3.6752
chr5:175989055-175989096:-:NSC	1	0.0230332	0.027271	0.0343078	0.174917	0.599975	0.632128	0.115307	0.245013
chr5:33876801-33876848:-:NSC	1	0	0	0	216.08	1543.79	4427.9	0	7737.57
chr5:86446461-86446516:-:ESC-NSC	1	0.0690996	0.0818131	0.0343078	0.641361	1.34994	0.118524	0.17296	0.673786
chr6:85676325-85676368:+:ESC-NSC	1	0.0460664	0.409065	0.188693	6.12208	23.199	27.8136	0.0384355	14.5783
chr7:101723100-101723164:+:NSC	1	0.207299	0.109084	0.137231	1.69086	1.69993	1.65933	0.0576533	1.28632
chr7:151229246-151229315:-:NSC	1	0.322465	1.58172	0.257309	0.583055	0.899963	1.4618	0.153742	16.6609
chr7:72763594-72763654:+:ESC-NSC	1	29.0449	36.7886	3.96256	107.515	143.794	121.764	247.39	60.5182
chr8:28418561-28418607:-:ESC-NSC	1	1.77356	0.736318	0.223001	1.69086	7.04971	12.1289	1.94099	3.98146
chr9:137405331-137405378:+:NSC	1	0.57583	0.54542	0.411694	1.80747	5.04979	27.063	0.442009	4.7165
chr9:95621470-95621516:+:NSC	1	0	0	0	1.80747	8.39965	21.1763	0	33.2605
chrX:106632384-106632433:+:NSC	1	0.0460664	0.163626	0.0857696	0.874583	3.19987	0.869175	0.0768711	0.612533
hsa-miR-1180	1	1.38199	3.9543	1.49239	9.03735	70.0971	77.4751	1.21072	14.6395
hsa-miR-1224-3p	1	0.0230332	0.027271	0.0343078	0.699666	0.749969	26.7469	0.0384355	0.0612533
hsa-miR-1234	1	0.0460664	0.136355	0.0343078	0.174917	0.24999	0.474096	0.0768711	0.245013
hsa-miR-1274b	1	3.45498	17.1535	1.59531	26.2958	37.2985	22.7566	5.80376	62.6008
hsa-miR-1280	1	35.8397	144.1	54.2922	353.098	1251.25	153.647	32.036	315.638
hsa-miR-1297	1	0.0230332	0.54542	0.669003	11.5445	49.6979	620.789	6.74544	1062.44
hsa-miR-1307	1	5.2055	2.99981	0.87485	27.6951	27.4489	21.4528	17.123	45.3274
hsa-miR-138-1star	1	0.276398	0.190897	0.205847	0.641361	0.24999	50.2146	0.115307	7.41164
hsa-miR-146b-3p	1	0.0230332	0.163626	0.0514618	0.174917	0.399983	2.9631	0.0576533	3.61394
hsa-miR-151-5p	1	105.4	598.899	79.5942	163.605	717.72	1231.31	104.122	689.834
hsa-miR-15a	1	6.5184	41.8337	27.086	75.9138	80.6967	234.282	61.1509	245.626
hsa-miR-15astar	1	1.17469	7.17228	0.497464	1.86578	3.74984	4.34588	1.38368	4.96151
hsa-miR-16-2star	1	5.6201	7.19955	1.59531	7.34649	33.6486	14.5389	3.7859	4.41023
hsa-miR-190b	1	0.0921328	1.44536	0.703311	2.68205	3.74984	0.434588	0.864799	69.3387
hsa-miR-193b	1	11.9773	30.4072	2.48732	27.4036	62.4974	86.6805	9.03235	199.257
hsa-miR-193bstar	1	2.28029	3.73613	0.548925	1.98239	14.9994	17.3045	5.1888	5.57405
hsa-miR-196a	1	0	0.0818131	0.0171539	0.116611	0.199992	0.039508	0	145.109
hsa-miR-221	1	66.1744	43.4155	5.71226	84.3098	426.332	479.785	113.712	244.768
hsa-miR-222	1	75.5719	13.0355	63.5724	41.6301	505.129	296.981	33.9962	126.059
hsa-miR-26a-1star	1	0.437631	0.354523	0.0171539	0.816277	1.34994	1.54081	0.115307	2.08261
hsa-miR-29b-1star	1	0.276398	0.218168	0.120077	0.583055	1.64993	10.4301	1.21072	12.6182
hsa-miR-300	1	0.0460664	0.054542	0.0171539	0.116611	0.0999958	0.0790159	0.0192178	0.0612533
hsa-miR-31	1	74.1669	177.916	3.08771	110.955	422.782	383.267	3.28624	818.589
hsa-miR-320a	1	23.0793	308.653	57.4656	188.618	1228.1	633.115	32.7471	423.383
hsa-miR-320b	1	22.4804	301.754	55.9732	187.627	1195.35	630.863	32.4972	422.893
hsa-miR-320c	1	21.9967	295.945	55.2013	186.869	1351.09	625.016	31.4595	422.157
hsa-miR-320d	1	21.8815	294.091	54.9097	186.986	1344.84	687.004	31.2673	422.219
hsa-miR-330-3p	1	3.22465	12.0538	1.66393	6.82174	15.5494	237.996	1.84491	5.08402
hsa-miR-331-5p	1	0.64493	2.69983	0.686157	0.991194	5.69976	6.51882	0.34592	3.49144
hsa-miR-34a	1	97.7759	265.783	61.96	122.383	179.543	546.316	109.58	445.801
hsa-miR-365	1	4.28417	21.435	0.617541	12.4774	42.9482	69.8501	11.7228	206.852
hsa-miR-375	1	0	0.027271	0	0.408139	0.149994	3.39769	0	2.7564
hsa-miR-423-3p	1	9.21328	56.0692	13.4658	62.6784	221.441	49.1874	8.12911	131.082
hsa-miR-423-5p	1	2.71792	6.54504	4.97464	5.36411	37.3984	27.9716	8.39816	22.9087
hsa-miR-424star	1	0.460664	0.436336	0	1.69086	8.49965	2.09392	0.461226	28.7278
hsa-miR-500star	1	2.28029	9.7903	3.68809	4.13969	30.3987	31.2113	1.84491	176.103
hsa-miR-501-3p	1	1.75052	6.13598	2.1957	2.74036	20.5491	20.2281	1.01854	91.3899
hsa-miR-501-5p	1	1.24379	7.63589	3.85963	2.27391	12.5995	6.63734	0.903235	43.061
hsa-miR-502-3p	1	2.34939	9.87211	3.80817	4.198	30.9987	32.7521	1.96021	179.717
hsa-miR-502-5p	1	0.437631	0.299981	0.39454	1.1078	1.49994	1.73835	0.845582	12.9857
hsa-miR-548n	1	0.0230332	0.436336	0.120077	3.32341	0.149994	0.711144	0.0960888	2.51138
hsa-miR-576-3p	1	0.0921328	0.518149	0.0514618	0.116611	0.599975	0.158032	0.0960888	0.245013
hsa-miR-589	1	1.38199	4.58153	0.737619	9.79532	10.8495	8.21766	1.07619	6.06407
hsa-miR-598	1	3.38588	23.5622	3.96256	12.7689	69.3971	245.542	4.59305	16.4771
hsa-miR-708star	1	1.79659	10.8266	2.77894	18.9493	6.09975	17.423	0.980106	132.736
hsa-miR-720	1	3.22465	7.44499	1.06354	27.8117	50.5979	9.00782	1.65273	109.276
hsa-miR-744	1	11.4475	94.4395	6.89588	18.6578	105.046	159.059	10.7427	39.6921
hsa-miR-874	1	0.276398	0.54542	0.428848	5.53902	8.79963	108.291	4.15104	8.45295
hsa-miR-885-5p	1	0.0921328	0.190897	0.617541	1.0495	1.59993	324.835	0.17296	1.34757
hsa-miR-92a	1	425.815	353.978	98.3777	850.969	3449.86	653.422	50.216	572.534
chr11:15312537-15312579:+:ESC	2	0	0	0	0.174917	0	0	0	0
chr15:66881252-66881307:-:NSC	2	0.0230332	0.0818131	0.0514618	0.0583055	0.0499979	0.039508	1.24915	0
chr16:62121639-62121678:-:ESC	2	426.989	1.36355	0.463156	309.952	3.44986	0.237048	0.538097	0.980052
chr17:40908521-40908573:-:NSC	2	6.4493	2.5362	2.23001	0.52475	0.649973	0.19754	0.787928	0.18376
chr17:8367171-8367231:-:ESC	2	0.460664	0	0	0.174917	0	0	0	0
chr3:49286568-49286614:+:ESC	2	0.460664	0.0818131	0.188693	0.116611	0.149994	0.118524	0.384355	0
chr6:75211867-75211929:+:ESC	2	0.115166	0	0	3.67325	0	0	0	0
chr8:27799484-27799541:-:ESC	2	0.322465	0	0	13.0604	0.0499979	0	0.0192178	0
chr9:123671954-123672027:-:ESC	2	0.414598	0	0	0	0	0	0	0
chr9:91825552-91825626:-:NSC	2	0.0230332	0.054542	0.0686157	0.0583055	0.0499979	0	0.0384355	0
hsa-miR-1236	2	0.0460664	0.027271	0.0857696	0.116611	0.349985	0.039508	0.0192178	0
hsa-miR-1283	2	1.31289	0.027271	0.0343078	0.874583	0.0499979	0.118524	0.115307	0
hsa-miR-1305	2	0.391564	1.66353	0.634695	0.466444	0.149994	0	0.0384355	0
hsa-miR-1323	2	6.47233	0	0	4.198	0	0	0.557315	0
hsa-miR-19astar	2	1.42806	1.14538	0.0857696	0.583055	0.0999958	0.039508	0.0384355	0
hsa-miR-302a	2	10794.7	47.3152	7.65065	7660.99	79.8967	2.44949	12.8375	3.24642
hsa-miR-302astar	2	1049.81	4.36336	0.566079	1341.43	17.6493	0.671636	1.05698	0.796292
hsa-miR-302b	2	10858.7	47.5334	7.82219	7706.12	81.0466	2.52851	12.9143	3.24642
hsa-miR-302c	2	11026.5	48.4606	7.73642	7928.56	81.9966	2.64703	12.8375	3.43018
hsa-miR-302d	2	11144.1	49.1424	7.80503	8079.68	87.5964	3.00261	13.0296	5.26778
hsa-miR-302f	2	11.079	0.0818131	0.0171539	2.1573	0.0499979	0	0.0384355	0
hsa-miR-367star	2	0.345498	0	0	0.0583055	0	0	0	0
hsa-miR-371-5p	2	280.222	0.899944	0.0514618	8.16277	0.0999958	0.158032	0.461226	0.0612533
hsa-miR-372	2	45.7209	0.109084	0	0.757972	0	0.039508	0.0576533	0
hsa-miR-373star	2	2.41849	0.054542	0.0171539	0.408139	0	0	0	0
hsa-miR-448	2	0.460664	0.299981	0.0343078	1.74917	0	0.790159	0	0
hsa-miR-453	2	0.184266	1.44536	0.343078	0.0583055	0.549977	0.711144	0.0576533	0
hsa-miR-490-5p	2	0.0230332	0.0818131	0.360232	0.0583055	0.0999958	4.66194	1.38368	0
hsa-miR-498	2	3.96171	0.027271	0.0171539	1.74917	0	0	0.0576533	0
hsa-miR-512-5p	2	62.7424	0.109084	0.0686157	34.8667	0.149994	0.0790159	1.5182	0
hsa-miR-515-3p	2	76.9078	0.190897	0.0514618	10.7865	0.0499979	0.316064	11.7997	0
hsa-miR-515-5p	2	3.57015	0.027271	0	0.991194	0.0499979	0.0790159	0.0768711	0
hsa-miR-517a	2	67.0957	0.299981	0.0686157	21.3398	0	1.30376	23.7339	0
hsa-miR-517b	2	52.7	0.27271	0.0857696	20.2903	0	1.26426	20.5246	0
hsa-miR-517c	2	74.1208	0.490878	0.0686157	17.7832	0.0499979	6.51882	18.7758	0.0612533
hsa-miR-518a-3p	2	1.38199	0.027271	0	1.1078	0	0	0.230613	0
hsa-miR-518b	2	3.50105	0.027271	0	7.34649	0	0.039508	0.192178	0
hsa-miR-518d-3p	2	3.38588	0.027271	0	1.39933	0	0	0.249831	0
hsa-miR-518d-5p	2	6.65659	0	0	8.16277	0	0	0.269049	0
hsa-miR-518e	2	3.77744	0	0.0343078	2.85697	0.0999958	0.316064	1.86412	0
hsa-miR-518fstar	2	7.50882	0	0	8.16277	0	0	0.326702	0
hsa-miR-519c-3p	2	14.2575	0.027271	0.0514618	2.27391	0	0.0790159	0.153742	0
hsa-miR-519e	2	22.2731	0.354523	0.0343078	7.11327	0	4.9385	1.94099	0
hsa-miR-519estar	2	7.85432	0.027271	0.0171539	1.57425	0	0.039508	0.134524	0
hsa-miR-520a-5p	2	4.56057	0.054542	0.0171539	0.174917	0	0	0.326702	0
hsa-miR-520c-5p	2	6.65659	0	0	8.16277	0	0	0.269049	0
hsa-miR-520d-3p	2	1.58929	0	0.0171539	1.22442	0	0	0.0768711	0
hsa-miR-520d-5p	2	7.18636	0.0818131	0.0343078	2.21561	0.0999958	0.118524	0.960888	0.0612533
hsa-miR-520f	2	31.7167	0.0818131	0.0343078	10.0869	0	0.039508	0.384355	0
hsa-miR-520g	2	37.8666	0.0818131	0.137231	15.2177	0	0.790159	3.43998	0
hsa-miR-520h	2	37.1525	0.054542	0.120077	17.6083	0	0.434588	2.15239	0
hsa-miR-521	2	6.90996	0.109084	0.0343078	6.00547	0.0499979	0.869175	3.49763	0
hsa-miR-523	2	2.21119	0.027271	0.0171539	0.583055	0.0499979	0.039508	0.0768711	0
hsa-miR-524-5p	2	5.59707	0	0.102924	13.177	0.0499979	0	0.787928	0
hsa-miR-526a	2	6.65659	0	0	8.16277	0	0	0.269049	0
hsa-miR-526b	2	10.9868	0	0.0171539	2.68205	0	0	0.288266	0
hsa-miR-548d-3p	2	0.0230332	0.163626	0.154385	0.466444	0.949961	0	0.153742	0
hsa-miR-602	2	0.115166	0.490878	0.0857696	0.0583055	0.199992	0.118524	0.0192178	0
hsa-miR-610	2	0.0230332	0.109084	0.0686157	0.116611	0.0999958	0	0.0192178	0
hsa-miR-767-3p	2	0.161232	0.0818131	0.0171539	0.233222	0	0.237048	0	0
chr1:148791040-148791105:+:NSC	3	0.0460664	0.054542	0.0343078	0.291528	1.14995	0.750652	0	0.428773
chr1:175143131-175143179:-:NSC	3	0.0460664	0.163626	0.0514618	1.22442	2.54989	1.93589	0	2.8789
chr1:31996857-31996912:-:NSC	3	0.138199	3.84521	3.00194	0.466444	4.6998	4.06932	0.0768711	0.18376
chr1:6412490-6412532:-:NSC	3	0.0230332	0.054542	0.0686157	0.233222	0.449981	0.276556	0	1.8376
chr10:49863571-49863628:-:ESC	3	0.161232	0.0818131	0.0343078	1.34103	0.799967	0.434588	0	0.428773
chr11:11634783-11634834:-:NSC	3	0.345498	0.954486	0.291617	1.28272	3.19987	1.30376	0	1.04131
chr13:113534955-113534993:-:NSC	3	0.529764	8.20858	0.720465	0.932888	12.5495	8.17815	0.288266	1.89885
chr18:33491107-33491167:+:NSC	3	0	0.0818131	0.0171539	0.583055	2.4999	1.85687	0	0.490026
chr20:62021365-62021426:+:NSC	3	0.414598	0.27271	1.71539	0.932888	8.19966	3.31867	0.307484	0.980052
chr8:12086678-12086744:+:NSC	3	0.0230332	2.01806	3.80817	1.51594	2.54989	3.39769	0.0768711	0.796292
chr8:12335913-12335979:+:NSC	3	0.0230332	2.01806	3.80817	1.51594	2.54989	3.39769	0.0768711	0.796292
chr9:36823154-36823204:+:NSC	3	0.161232	0.054542	0.360232	0.233222	0.649973	0.0790159	0	0.18376
hsa-miR-105	3	3.20161	0.981757	1.93839	3.1485	1.24995	6.79537	0.0384355	0.0612533
hsa-miR-1197	3	2.48759	18.6534	5.55787	0.0583055	0.799967	4.42489	0	0.122507
hsa-miR-1227	3	0.368531	5.48147	1.78401	3.49833	8.99963	2.56802	0.634186	0.980052
hsa-miR-1229	3	0.0921328	0.899944	0.377386	0.408139	1.44994	3.91129	0.0960888	0.18376
hsa-miR-1237	3	0	0.190897	0.120077	0.0583055	0.349985	0.829667	0	0.306266
hsa-miR-124	3	41.5749	119.911	197.545	43.0295	456.231	9412.81	0.0192178	13.2307
hsa-miR-124star	3	6.97906	19.417	27.9094	6.00547	62.3974	53.3753	0	0.18376
hsa-miR-1251	3	1.03649	20.3169	7.30757	1.1078	4.09983	0.513604	0	0.551279
hsa-miR-1262	3	0.0230332	0.381794	0.188693	0.116611	0.499979	0.0790159	0.0192178	0.428773
hsa-miR-1264	3	2.30332	0.736318	0.120077	6.00547	0.149994	6.9534	0	0.0612533
hsa-miR-1267	3	0.299432	0.627233	0.96062	0.874583	0.749969	0.908683	0.0192178	0.0612533
hsa-miR-1269	3	0	0.54542	0.240155	0.116611	2.3499	0.19754	0	1.9601
hsa-miR-1270	3	2.94825	2.20895	1.21793	6.18038	5.94975	2.37048	0.230613	5.14527
hsa-miR-128	3	15.5704	57.2146	49.6949	31.485	106.696	4336	14.9322	53.5966
hsa-miR-1281	3	0	0.054542	0.0171539	0.116611	0.0499979	0.039508	0	0.18376
hsa-miR-129-3p	3	8.61442	13.8537	25.9024	6.18038	90.9462	788.224	1.26837	20.9486
hsa-miR-129-5p	3	0.921328	0.572691	0.48031	1.16611	0.0499979	111.729	0.0192178	3.00141
hsa-miR-1296	3	0.207299	1.30901	0.514618	0.466444	0.849965	2.33097	0.134524	0.612533
hsa-miR-129star	3	8.22285	13.5264	25.302	6.12208	89.5463	782.297	1.21072	20.8874
hsa-miR-1304	3	0.598863	0.599962	0.548925	1.69086	1.39994	0.553112	0.0384355	0.857546
hsa-miR-135b	3	104.363	731.9	734.342	78.3043	94.0961	113.506	14.9899	184.556
hsa-miR-138	3	54.8881	47.7788	32.0264	23.4971	29.2988	5288.62	1.65273	670.907
hsa-miR-138-2star	3	0	0.163626	0.703311	0.0583055	1.04996	24.0999	0	0.673786
hsa-miR-151-3p	3	22.872	101.312	31.5632	17.7249	89.4963	170.911	6.78387	108.725
hsa-miR-15b	3	153.585	528.812	245.061	198.472	1498.34	353.083	151.801	334.504
hsa-miR-16-1star	3	0.0460664	0.572691	0.154385	0.408139	0.0499979	0.118524	0.0384355	0.490026
hsa-miR-17star	3	79.6718	69.2957	46.4528	125.765	126.345	74.1565	10.8004	75.464
hsa-miR-184	3	0.184266	6.32688	0.428848	0.116611	0.0999958	2.76556	0.0384355	4.28773
hsa-miR-219-2-3p	3	0.829195	73.2772	21.5453	8.92074	2321.05	2197.75	0.0384355	0.18376
hsa-miR-219-5p	3	0.391564	54.5966	44.6002	4.31461	238.84	164.472	0.153742	1.22507
hsa-miR-31star	3	4.51451	23.2076	1.02924	6.18038	17.2493	23.3492	0.0960888	37.732
hsa-miR-331-3p	3	48.2776	594.426	512.268	135.56	1241.15	974.03	26.4629	402.128
hsa-miR-342-5p	3	0.760096	7.66316	2.91617	1.98239	23.849	16.0402	0.480444	5.26778
hsa-miR-34b	3	0.345498	3.43615	0.600387	0.349833	2.19991	10.8647	0.115307	0.36752
hsa-miR-34bstar	3	3.86958	5.97235	0.514618	2.04069	3.24987	19.675	0.326702	2.08261
hsa-miR-34c-3p	3	0.207299	1.28174	0.223001	0.291528	1.39994	6.24226	0.0960888	0.551279
hsa-miR-363star	3	1.26683	4.19974	0.943466	5.42241	14.6494	0.59262	0	0.612533
hsa-miR-374a	3	14.9025	34.6887	22.1972	25.6544	32.0987	93.1203	11.6652	24.4401
hsa-miR-374b	3	34.9644	83.7766	60.4676	49.7346	103.496	267.39	16.3159	51.5752
hsa-miR-374bstar	3	22.3652	53.6148	36.8981	36.0911	70.9971	188.374	3.74746	26.9514
hsa-miR-410	3	2.74095	7.41772	1.61247	0.116611	0.799967	7.38799	0	0.18376
hsa-miR-432	3	1.40503	5.69964	1.01208	0.466444	5.64977	39.429	0.17296	1.04131
hsa-miR-449b	3	0.115166	4.33609	0.308771	0.0583055	0.0999958	0.513604	0.0192178	0.551279
hsa-miR-504	3	2.53365	11.7538	14.2892	6.82174	107.546	129.152	0.653404	17.0284
hsa-miR-505	3	20.6838	73.6863	35.9718	36.4992	139.294	46.5404	10.5506	80.548
hsa-miR-505star	3	2.87915	9.27215	4.59725	6.12208	19.5492	4.74096	0.711057	8.08543
hsa-miR-548b-5p	3	2.37242	7.5268	3.03624	4.48952	6.49973	6.16324	2.09474	3.61394
hsa-miR-548d-5p	3	2.62578	8.07222	3.07055	4.60613	6.54973	6.71636	2.32535	3.85896
hsa-miR-548e	3	0.0460664	0.136355	0.0686157	0.116611	0.0499979	0.237048	0	0.306266
hsa-miR-551b	3	7.23242	309.908	291.428	29.0361	121.695	58.3928	4.4393	23.705
hsa-miR-577	3	0.875262	1.44536	0.0857696	3.73155	0.999959	75.1837	0	9.49426
hsa-miR-589star	3	2.32635	8.69945	1.54385	3.2068	3.04987	3.87178	0.672622	1.9601
hsa-miR-592	3	1.65839	2.5362	1.92124	3.09019	3.44986	10.5881	0	1.04131
hsa-miR-625	3	4.12294	42.161	30.2081	17.2001	155.894	113.23	4.36243	11.6994
hsa-miR-625star	3	4.12294	42.4337	30.5511	17.4333	149.394	115.284	4.51617	11.9444
hsa-miR-627	3	0.276398	1.6908	0.634695	0.583055	1.19995	2.01491	0.211395	2.14386
hsa-miR-641	3	3.68531	5.56329	3.15632	2.33222	3.09987	4.9385	0.595751	1.8376
hsa-miR-671-3p	3	0.921328	1.82716	1.54385	1.0495	5.29978	5.17554	0.384355	3.36893
hsa-miR-7	3	32.2234	41.2338	53.5031	22.7391	85.8464	488.082	2.01787	11.6994
hsa-miR-708	3	6.95603	93.7578	61.96	23.0307	146.494	247.043	5.34254	49.0026
hsa-miR-7-1star	3	13.866	55.0875	48.5284	26.1792	108.495	191.179	12.1456	26.8902
hsa-miR-744star	3	2.41849	20.9441	7.63349	5.01427	16.6993	32.9101	2.383	4.7165
hsa-miR-760	3	0.161232	4.88151	1.13216	0.816277	7.34969	16.5933	0.192178	0.428773
hsa-miR-766	3	2.71792	26.5892	13.3286	9.38719	46.5481	41.2463	3.47842	16.5996
hsa-miR-769-3p	3	0.783129	6.10871	2.45301	1.16611	8.39965	19.3194	0.115307	1.10256
hsa-miR-769-5p	3	7.64702	52.9603	21.2194	8.74583	26.1989	80.7543	2.9211	7.65666
hsa-miR-873	3	2.71792	18.2716	13.3114	7.28819	4.09983	34.0559	0.134524	1.65384
hsa-miR-876-3p	3	0.276398	1.55445	0.806234	0.699666	0.0999958	4.26686	0.0768711	0.36752
hsa-miR-876-5p	3	1.10559	4.9906	4.68302	2.97358	0.449981	4.22735	0.0768711	0.673786
hsa-miR-877	3	0.253365	2.64529	0.377386	0.991194	8.24966	1.65933	0.134524	0.918799
hsa-miR-877star	3	1.17469	3.46342	1.16647	0.816277	6.44973	4.978	0.269049	2.20512
hsa-miR-891a	3	0.299432	1.8817	1.26939	0.0583055	0.149994	0.671636	0.0192178	5.14527
hsa-miR-9	3	2.97128	431.209	347.367	12.0109	937.811	9731.05	2.383	57.0268
hsa-miR-92b	3	43.5788	180.48	81.5497	157.25	2643.84	336.568	2.84423	46.3075
hsa-miR-93	3	226.255	892.39	110.866	1204.94	4145.28	783.799	46.3725	419.707
hsa-miR-935	3	8.84475	169.517	74.2765	30.5521	97.8959	309.98	1.09541	0.36752
hsa-miR-940	3	0.598863	13.7446	4.30563	3.32341	12.9995	12.0894	0.230613	4.04272
hsa-miR-941	3	0.667963	0.409065	2.14424	0.991194	8.39965	4.42489	0.538097	1.10256
hsa-miR-942	3	0.115166	0.436336	0.0514618	1.57425	1.44994	0.632128	0	0.0612533
hsa-miR-99bstar	3	3.06342	170.826	14.5808	11.8943	21.8491	44.565	3.34389	41.5297
hsa-miR-9star	3	1.17469	188.661	282.92	2.62375	127.045	1589.21	0.538097	8.33044
chr1:112805924-112805967:-:ESC-NSC	4	2.04995	523.494	10.3438	3.1485	11.5995	20.5837	154.857	40.4272
chr10:132650850-132650910:-:ESC-NSC	4	54.4044	13.8537	8.71419	86.8169	33.9986	109.477	1490.18	657.554
chr11:19720919-19720953:+:NSC	4	0.0230332	1.60899	0.343078	0.349833	0.749969	1.30376	3.95886	16.2934
chr15:38072071-38072124:+:NSC	4	0	0	0.0343078	0	0.0499979	0	0.288266	77.9142
chr2:10250200-10250237:-:NSC	4	0	0	0	0	0	0	0	0
chr5:174364768-174364816:+:NSC	4	1.40503	105.103	5.78087	13.2353	165.093	3662.39	1016.39	13114.1
chr5:31971974-31972011:-:NSC	4	0	0	0	0	0	0	0	0.0612533
chr5:96036612-96036657:-:NSC	4	0.138199	1.52718	0.240155	0.0583055	1.54994	16.0797	6.3803	23.5825
chrX:21874976-21875021:-:NSC	4	0.460664	59.3145	6.24403	0.757972	7.1497	37.3745	63.6108	49.7376
chrX:49662031-49662089:+:NSC	4	0.529764	2.23622	0.943466	0.583055	3.79984	4.18785	0.768711	19.2335
chrX:78043356-78043391:-:NSC	4	0.138199	35.8887	2.52163	0.349833	2.59989	89.9992	288.459	319.068
chrX:89747034-89747107:+:NSC	4	0	0	0.0171539	0	0.149994	0.0790159	0.0576533	0.122507
hsa-let-7a	4	6.47233	247.594	300.845	10.5533	176.643	6548.29	1098.95	6500.81
hsa-let-7astar	4	0.368531	3.89976	4.08263	0.116611	1.14995	46.1848	12.2609	30.5041
hsa-let-7b	4	5.18247	130.683	175.776	9.32888	115.195	4813.69	779.799	5050.45
hsa-let-7bstar	4	0.0230332	0.354523	0.446002	0.0583055	0.349985	46.975	7.32197	34.6693
hsa-let-7c	4	5.59707	140.118	186.669	9.38719	123.295	4894.56	814.872	5090.64
hsa-let-7d	4	2.32635	35.725	45.0633	3.38172	19.8492	1479.89	327.759	1777.51
hsa-let-7e	4	3.73138	178.952	177.372	4.60613	97.146	1917.52	415.565	1843.23
hsa-let-7f	4	3.27071	124.792	164.266	4.43122	57.1476	3993.23	747.552	4042.47
hsa-let-7f-1star	4	0.0690996	0.627233	0.943466	0.0583055	0.499979	14.697	3.70903	8.5142
hsa-let-7f-2star	4	0.0230332	2.97254	2.93332	0.174917	1.04996	26.5099	6.84152	23.0312
hsa-let-7g	4	1.17469	195.915	208.403	0.641361	31.5487	1658.58	433.956	1631.6
hsa-let-7i	4	0.990428	182.252	190.529	0.641361	30.0988	1454.53	366.348	1501.99
hsa-miR-1	4	3.08645	6.13598	1.115	2.50714	1.49994	74.354	10760.4	86.1221
hsa-miR-101	4	105.423	267.474	274.686	37.024	40.9983	523.165	162.217	451.314
hsa-miR-101star	4	1.47412	0.354523	0.531772	1.63255	0.749969	23.4677	2.97875	8.75922
hsa-miR-10a	4	0.253365	21.735	3.25924	7.87124	7.74968	9.99552	29.1726	3740.49
hsa-miR-10b	4	0.207299	7.14501	7.54772	8.10446	4.49981	3.43719	41.7794	5129.47
hsa-miR-1225-3p	4	0	0	0.0686157	0	0	0.237048	0	0.0612533
hsa-miR-126	4	20.845	42.5973	4.68302	8.10446	4.7498	1357.73	2875.84	2576.99
hsa-miR-126star	4	13.4975	33.707	6.48418	14.1682	5.74976	1450.54	3363.26	2476.29
hsa-miR-133a	4	0.230332	1.09084	0.188693	0.699666	0.699971	11.7734	1776.91	10.5356
hsa-miR-133b	4	0.253365	1.09084	0.188693	0.699666	0.699971	11.7339	1776.66	10.5356
hsa-miR-139-3p	4	0	0.027271	0	0	0.999959	20.9787	0.0384355	3.43018
hsa-miR-139-5p	4	0.322465	2.45439	10.035	0.816277	42.2982	1561.16	68.7804	183.699
hsa-miR-140-3p	4	117.584	1328.7	571.346	181.214	471.73	1986.11	697.47	2268.82
hsa-miR-140-5p	4	2.39545	31.198	13.7231	5.3058	10.1496	116.351	15.0091	90.5323
hsa-miR-143	4	1.81962	415.501	28.75	3.55664	16.3493	930.215	2153.85	5442.66
hsa-miR-143star	4	0.0230332	2.5362	0.0514618	0.116611	0.0499979	0.316064	3.09406	2.51138
hsa-miR-145	4	15.7317	2563.37	171.162	20.8734	183.092	4303.92	20794.3	15255
hsa-miR-145star	4	0.0690996	4.47245	0.343078	0.0583055	0.24999	7.11144	21.889	32.7705
hsa-miR-146a	4	0.50673	3.29979	2.36724	1.57425	3.49985	79.6876	14.0866	166.241
hsa-miR-146b-5p	4	0.57583	3.27252	2.35009	1.69086	3.49985	79.8061	13.8944	166.303
hsa-miR-150	4	2.07299	0.0818131	0.171539	0.699666	0.24999	214.173	285.115	561.631
hsa-miR-152	4	0.345498	39.7066	9.6405	0.932888	4.7998	43.3798	63.8606	120.363
hsa-miR-181c	4	1.22076	14.3991	23.6381	4.83936	5.64977	123.62	13.7215	63.7034
hsa-miR-1827	4	0	0	0	0	0	0.671636	0	0.490026
hsa-miR-185	4	12.0464	39.7611	41.3066	19.9988	32.3487	165.183	94.8397	94.1463
hsa-miR-186	4	13.0138	31.2526	16.4506	8.27938	19.1492	38.5598	50.5619	63.3971
hsa-miR-188-3p	4	0.276398	2.50893	1.42378	0.757972	0.699971	0.790159	0.807146	8.08543
hsa-miR-188-5p	4	2.09602	19.3624	2.40155	3.09019	8.09966	6.9139	3.72825	48.4513
hsa-miR-190	4	2.69488	20.3715	5.95241	3.49833	2.4499	40.2981	14.6055	109.643
hsa-miR-192	4	31.901	129.346	86.1298	31.9514	39.6484	141.36	52.4068	6444.15
hsa-miR-192star	4	0.138199	0.736318	0.360232	0.233222	0.699971	3.04211	0.672622	81.2831
hsa-miR-193a-3p	4	0.852228	1.28174	0.0686157	1.74917	0.499979	5.49161	3.47842	70.0125
hsa-miR-194	4	2.69488	4.22701	4.54579	0.408139	0.949961	8.49421	4.20869	248.259
hsa-miR-195	4	3.22465	3.43615	1.23508	4.78105	6.84972	319.501	397.327	718.501
hsa-miR-195star	4	0.138199	0.027271	0.0171539	0.174917	0.0999958	4.10883	1.61429	7.84042
hsa-miR-196b	4	0	0.136355	0.0171539	0	0.0499979	0.0790159	0.0384355	82.8757
hsa-miR-199a-3p	4	3.50105	398.13	49.2489	8.68752	27.1989	63.0152	239.876	1435.96
hsa-miR-199a-5p	4	2.87915	698.302	206.396	5.36411	18.5992	61.9485	1020.02	1882.37
hsa-miR-199b-3p	4	3.50105	398.13	49.2489	8.68752	27.1989	63.0152	239.876	1435.96
hsa-miR-199b-5p	4	10.5492	624.97	135.67	6.29699	33.1986	39.824	821.117	223.881
hsa-miR-203	4	1.33593	0.218168	0.0343078	0.349833	0.199992	25.2456	2.61362	30.5654
hsa-miR-204	4	35.1256	615.398	207.683	65.8852	145.744	912.99	23.7532	4724.53
hsa-miR-206	4	0.0230332	0.027271	0.0857696	0.116611	0.0999958	0.474096	5.5155	1.8376
hsa-miR-21	4	822.331	15294.9	2026.2	441.664	1220.45	1410.12	849.502	12591.3
hsa-miR-211	4	32.7762	573.21	193.325	63.7279	135.494	865.975	22.6385	4672.46
hsa-miR-214	4	0.829195	253.648	31.6661	9.79532	45.2981	24.653	204.592	462.83
hsa-miR-214star	4	0.50673	96.6758	9.70912	1.45764	5.14979	4.74096	14.6439	96.2901
hsa-miR-215	4	27.9623	111.266	74.7225	30.0856	37.6984	119.038	45.9881	6146.7
hsa-miR-22	4	4.00778	73.5227	7.99373	1.98239	13.1995	81.1494	260.747	107.806
hsa-miR-22star	4	1.70446	20.8896	2.96763	1.69086	6.39973	96.9131	85.9034	101.619
hsa-miR-23a	4	119.404	3500.51	730.723	120.051	1034.16	5956.74	8042.63	10608.6
hsa-miR-23b	4	118.275	3521.21	738.905	120.517	1047.86	6057.6	8075.07	10631.5
hsa-miR-24	4	243.968	15214.3	1060.7	254.329	1820.02	5709.69	17073.4	10067.1
hsa-miR-24-1star	4	0.299432	5.94508	1.56101	1.28272	4.29982	22.5591	18.2184	59.7219
hsa-miR-24-2star	4	0.921328	21.9259	3.82532	1.0495	2.14991	13.0376	62.2271	60.5795
hsa-miR-26a	4	192.511	863.837	489.127	162.148	681.722	6648.4	2636.1	6659.7
hsa-miR-26a-2star	4	0.414598	0.818131	0.446002	0.757972	0.899963	2.84457	1.15307	2.57264
hsa-miR-26b	4	11.1941	82.4948	61.2395	14.0516	62.2974	690.599	397.366	1191.5
hsa-miR-26bstar	4	0.138199	1.14538	1.0807	0.349833	3.24987	8.09913	2.49831	9.80052
hsa-miR-27a	4	16.9985	216.45	39.1452	17.2584	62.1474	825.282	639.875	2003.59
hsa-miR-27b	4	16.3305	215.114	40.0373	17.1418	62.7974	856.493	630.227	1971.5
hsa-miR-29a	4	80.0864	288.636	328.926	77.6629	139.494	9106.27	4996.02	9666.38
hsa-miR-29astar	4	0.322465	2.39985	0.96062	0.466444	0.399983	12.287	9.01313	14.9458
hsa-miR-29b	4	62.3969	437.836	317.639	39.3562	93.5961	9964.03	9134.09	8737.9
hsa-miR-29b-2star	4	0.161232	3.89976	3.80817	0.757972	9.84959	111.531	29.038	77.4241
hsa-miR-29c	4	99.181	514.086	421.129	76.0887	144.444	13317.1	10304.7	12099.2
hsa-miR-29cstar	4	0.322465	7.96314	10.9957	0.816277	9.19962	590.447	109.388	286.298
hsa-miR-30a	4	66.9114	3034.96	1606.22	87.6332	924.012	1660.68	1453.75	5703.29
hsa-miR-30astar	4	14.3266	17.0444	87.7423	21.1649	337.286	218.795	282.117	434.898
hsa-miR-30b	4	189.747	1526.66	1417.65	163.838	1384.09	1883.11	4878.68	4622.48
hsa-miR-30bstar	4	0.230332	0.572691	0.446002	0.349833	1.54994	1.4618	1.22994	2.8789
hsa-miR-30c	4	191.475	1544.03	1450.24	165.238	1426.99	1895.43	4876.1	4562.45
hsa-miR-30dstar	4	0.161232	0.79086	0.514618	0.349833	1.09995	0.908683	2.36378	5.08402
hsa-miR-30e	4	86.2363	1999.07	978.906	72.707	490.38	985.408	1047.37	2943.53
hsa-miR-30estar	4	14.6491	17.3716	88.5485	21.0483	334.786	219.546	284.557	432.693
hsa-miR-32	4	6.42626	24.7075	8.40542	3.03189	3.99983	22.322	8.26364	17.3347
hsa-miR-335	4	10.411	47.9425	16.828	3.96477	2.4499	83.0458	22.0236	29.5853
hsa-miR-33a	4	3.06342	50.9968	0.634695	3.44002	3.44986	70.4032	4.49696	14.8233
hsa-miR-362-3p	4	11.9082	42.8428	53.9662	6.93835	7.39969	36.3473	41.2413	219.96
hsa-miR-362-5p	4	2.34939	7.5268	9.34889	4.78105	8.59964	14.6575	4.45852	104.682
hsa-miR-378	4	61.1762	15.7354	9.69196	104.309	40.6983	124.213	1664.34	773.2
hsa-miR-424	4	8.45318	136.982	21.4081	2.74036	7.44969	26.1938	99.6057	452.355
hsa-miR-450a	4	0.529764	5.42693	0.240155	0.52475	2.24991	3.43719	3.72825	44.8374
hsa-miR-450b-5p	4	0.184266	2.23622	0.343078	0.0583055	0.24999	0.355572	0.634186	6.06407
hsa-miR-452	4	0.990428	9.19033	2.1957	1.1078	2.04991	3.67424	29.0573	13.8432
hsa-miR-452star	4	0.115166	0.327252	0.120077	0.174917	0.0499979	0.158032	1.05698	0.490026
hsa-miR-455-5p	4	1.88872	18.3807	5.88379	1.63255	2.04991	3.67424	5.88064	34.2406
hsa-miR-483-5p	4	0.0690996	0.299981	0.120077	0.0583055	0.0999958	2.05441	0.730275	1.71509
hsa-miR-486-3p	4	1.22076	1.00903	1.56101	1.45764	8.04967	45.5922	46.334	4.41023
hsa-miR-486-5p	4	1.19773	0.981757	1.56101	1.51594	5.89976	46.0268	46.6031	4.34898
hsa-miR-497	4	0.552797	1.93624	0.909158	1.45764	0.449981	201.491	71.0096	282.255
hsa-miR-499-5p	4	0.0921328	0.327252	0.223001	0.116611	0.199992	7.46701	120.073	1.65384
hsa-miR-500	4	0.944361	2.89073	1.56101	0.699666	4.54981	4.978	1.61429	24.0725
hsa-miR-532-5p	4	21.536	131.61	83.7797	16.5588	50.6479	68.4278	32.1129	436.736
hsa-miR-542-3p	4	3.01735	37.1431	12.3851	1.45764	3.24987	9.36339	26.5205	108.908
hsa-miR-542-5p	4	0.368531	7.44499	1.47524	0.349833	2.19991	1.26426	2.45987	15.2521
hsa-miR-548c-5p	4	0.598863	4.55426	0.634695	0.874583	0.499979	6.63734	1.4029	3.73645
hsa-miR-548o	4	0.161232	0.354523	0.120077	0.233222	0.149994	0.276556	0.230613	0.36752
hsa-miR-574-3p	4	10.0425	359.514	56.3163	17.4917	97.446	693.483	325.607	347.061
hsa-miR-590-3p	4	2.51062	18.3534	4.09979	4.66444	5.24978	36.5449	6.18812	16.6609
hsa-miR-590-5p	4	47.5636	353.269	82.4932	72.1822	37.3485	204.138	87.6714	181.8
hsa-miR-652	4	0.184266	0.299981	0.360232	0.466444	3.19987	9.28437	3.84355	2.38888
hsa-miR-660	4	25.9814	62.6961	41.0493	34.1087	76.0468	277.781	88.3825	1574.45
hsa-miR-664	4	0.667963	6.08144	7.08457	2.04069	8.69964	132.51	28.3654	83.7945
hsa-miR-664star	4	0.0690996	0.054542	0.137231	0.174917	0.399983	5.4521	0.307484	5.6353
hsa-miR-95	4	0.64493	2.04533	6.69003	1.28272	10.0996	87.7077	11.4154	21.1936
hsa-miR-98	4	0.0460664	3.19071	2.14424	0.0583055	1.99992	116.351	9.97402	59.1094
chr2:28072749-28072811:+:ESC	5	1.12863	0.163626	1.04639	0.174917	0	0.158032	0.0768711	0.122507
hsa-miR-1255a	5	0.0230332	0.0818131	0.0171539	0.0583055	0	0.276556	0.0192178	0.122507
hsa-miR-1255b	5	0.0230332	0.0818131	0	0.0583055	0	0.276556	0.0192178	0.122507
hsa-miR-141	5	42.8648	1.47264	0.291617	7.92955	0.199992	4.66194	0.69184	921.862
hsa-miR-148a	5	125.255	47.1789	18.2689	24.7798	3.99983	14.6575	88.4017	135.002
hsa-miR-182star	5	0.990428	0	0	0.52475	0	0.0790159	0.0192178	0.245013
hsa-miR-187	5	28.3539	1.00903	0.0343078	36.266	0.649973	21.1368	3.61294	54.1479
hsa-miR-193a-5p	5	2.69488	9.16306	0.377386	3.38172	0.0499979	32.357	27.5583	64.7447
hsa-miR-200a	5	42.0586	1.39082	0.274463	7.87124	0.24999	4.74096	0.653404	928.477
hsa-miR-200bstar	5	0.760096	0	0	0.641361	0	0.316064	0	43.1223
hsa-miR-200c	5	3.84654	0.027271	0.137231	1.22442	0.0499979	0.39508	0.192178	47.1038
hsa-miR-323-5p	5	0.230332	0.599962	0.120077	0.0583055	0	2.68654	0.0192178	0.0612533
hsa-miR-330-5p	5	0.253365	0.299981	0.0514618	0.233222	0	8.45471	0.0768711	0.735039
hsa-miR-335star	5	13.152	11.8356	0.892004	3.2068	1.09995	9.83749	2.21004	2.08261
hsa-miR-371-3p	5	3.43195	0	0	0.408139	0	0.0790159	0.0192178	0.245013
hsa-miR-373	5	282.594	0.709046	0.0514618	7.87124	0	0.19754	0.461226	0.122507
hsa-miR-378star	5	5.2746	2.918	2.28147	15.9757	0.149994	16.6329	99.8747	55.3729
hsa-miR-429	5	1.10559	0.027271	0.0171539	1.16611	0	0.474096	0	131.878
hsa-miR-489	5	6.81783	5.89054	0.343078	2.33222	1.29995	1.38278	0.730275	27.809
hsa-miR-497star	5	0.230332	0.54542	0.137231	0.291528	0	6.55832	8.09068	9.49426
hsa-miR-514	5	0.0921328	0.027271	0.0686157	0.233222	0	0.19754	0.0768711	48.0226
hsa-miR-516b	5	11.4475	0	0.0343078	2.91528	0	0.158032	0.672622	0.0612533
hsa-miR-518c	5	20.0849	0.0818131	0.0171539	2.1573	0	0.158032	1.69116	0.0612533
hsa-miR-518f	5	19.6473	0.054542	0	2.21561	0	0.158032	1.57586	0.122507
hsa-miR-519a	5	56.201	0.463607	0.0514618	13.177	0	7.54602	7.66789	0.122507
hsa-miR-519b-3p	5	57.6521	0.463607	0.0514618	14.5764	0	7.50652	7.49493	0.0612533
hsa-miR-519d	5	36.5767	0.109084	0.0514618	13.4686	0	0.434588	2.34457	0.18376
hsa-miR-520b	5	37.0143	0.0818131	0	23.089	0	0.237048	0.51888	0.0612533
hsa-miR-520c-3p	5	37.1065	0.0818131	0.0171539	23.089	0	0.237048	0.51888	0.0612533
hsa-miR-522	5	0.667963	0	0.0343078	5.18919	0	1.10622	0.153742	0.122507
hsa-miR-526bstar	5	35.0335	0.054542	0	23.0307	0	0.237048	0.461226	0.0612533
hsa-miR-548l	5	0.0460664	0.109084	0	0.233222	0	0.158032	0.0384355	0.18376
chr1:207863421-207863467:-:ESC	6	0.0230332	0	0	0.0583055	0.0999958	0.0790159	0.0192178	0.36752
chr1:23062248-23062295:-:ESC	6	0.253365	0	0	0.757972	0.449981	5.72866	0.499662	2.69514
chr10:112127732-112127786:+:ESC	6	0.276398	0	0	1.16611	0.0499979	0	0	0.0612533
chr16:24888530-24888612:-:ESC	6	4.53754	0	0	41.222	0.299988	0.039508	0	0.245013
chr17:72904670-72904720:-:NSC	6	0.207299	0.0818131	0	0.233222	0.149994	0.158032	0.192178	0.18376
chr4:28430312-28430380:+:ESC	6	0.0230332	0	0	0.116611	0.0499979	0.316064	0.903235	0.18376
chr5:6880975-6881023:-:ESC	6	0.207299	0	0.0857696	0.174917	0.0999958	0.474096	2.28691	0.122507
chr6:138526529-138526608:+:ESC	6	1.58929	0	0.0343078	2.62375	0.0499979	0	0	0.0612533
chr6:73734140-73734186:-:ESC	6	0.0230332	0	0.120077	0.874583	0.149994	0.118524	0.0576533	0.306266
chrX:150087363-150087446:+:ESC-NSC	6	4.33024	0.463607	0.360232	4.72275	6.04975	1.9754	1.15307	1.77634
hsa-miR-1238	6	0.0230332	0	0	0	0.0499979	0	0	0.0612533
hsa-miR-1266	6	0.0690996	0	0.0514618	0.0583055	0.0499979	0.118524	0	0.122507
hsa-miR-1298	6	0.322465	0	0.0343078	4.198	0.0999958	0.237048	0.0384355	0.0612533
hsa-miR-182	6	74.1439	3.08163	1.71539	48.2187	3.79984	5.57062	0.960888	52.1878
hsa-miR-183	6	15.5935	0.627233	0.205847	16.2672	1.09995	1.18524	0.0384355	16.1709
hsa-miR-183star	6	1.91176	0.109084	0.120077	2.33222	0.0999958	0.118524	0.0768711	1.16381
hsa-miR-187star	6	0.437631	0	0	0.874583	0.0499979	0.039508	0.0192178	0.36752
hsa-miR-205	6	18.058	2.56348	0.0171539	27.7534	0.799967	0.711144	0.269049	9.92303
hsa-miR-296-3p	6	4.05384	0.136355	0.0343078	11.7777	5.84976	0.948191	0.249831	0.490026
hsa-miR-302e	6	13.9121	0	0.0343078	174.567	2.79988	0.118524	0	0.245013
hsa-miR-324-3p	6	0.161232	0	0.0343078	5.01427	6.89971	22.164	0.34592	21.0711
hsa-miR-517star	6	13.4514	0	0	3.49833	0.0499979	0.039508	0.230613	0
hsa-miR-518cstar	6	5.64313	0	0.0171539	1.51594	0.0499979	0	0.230613	0.0612533
hsa-miR-518estar	6	5.52797	0	0	1.57425	0.0499979	0.19754	0.17296	0.122507
hsa-miR-519astar	6	5.52797	0	0	1.57425	0.0499979	0.19754	0.17296	0.122507
hsa-miR-519b-5p	6	5.52797	0	0	1.57425	0.0499979	0.19754	0.17296	0.122507
hsa-miR-519c-5p	6	5.52797	0	0	1.57425	0.0499979	0.19754	0.17296	0.122507
hsa-miR-522star	6	5.52797	0	0	1.57425	0.0499979	0.19754	0.17296	0.122507
hsa-miR-523star	6	5.52797	0	0	1.57425	0.0499979	0.19754	0.17296	0.122507
hsa-miR-524-3p	6	4.76787	0.218168	0.0857696	2.97358	0.649973	0.316064	0.499662	0.36752
hsa-miR-587	6	0	0	0	0.116611	0.0999958	0	0.0192178	0
hsa-miR-765	6	0.0460664	0	0.0514618	0.116611	0.299988	0.158032	0.0576533	0.0612533
chr13:25436638-25436682:-:NSC	7	0.0230332	1.96351	0.137231	0	0.199992	15.4081	16.1814	60.3345
chr14:102075745-102075807:+:ESC	7	5.66617	1.49991	6.3298	0.757972	1.69993	1.02721	2.34457	1.71509
chr2:109124387-109124465:-:NSC	7	0.0230332	0.0818131	0.0857696	0	0.199992	0	0.153742	0.122507
chr4:3572511-3572557:+:NSC	7	0.0230332	0.027271	0	0	0.399983	0.316064	0.0384355	0.18376
chr5:1761909-1761972:-:NSC	7	0.829195	0.927215	0.583233	0.233222	0.549977	0.158032	0.614968	0.245013
hsa-let-7istar	7	0.0921328	16.9898	28.7157	0	1.54994	19.0428	4.26634	23.0312
hsa-miR-1294	7	0.0690996	0.163626	0.0686157	0	0.199992	0.276556	0.0192178	0.122507
hsa-miR-1299	7	0.0690996	0	0.0686157	0	0.149994	0	0.115307	0.36752
hsa-miR-132star	7	0.115166	12.0811	5.90095	0	79.2467	142.979	2.61362	16.2934
hsa-miR-136	7	43.7861	136.628	20.5332	0.116611	2.74989	403.534	46.949	54.0254
hsa-miR-136star	7	7.60096	23.0713	15.5415	0	0.399983	32.9497	6.01516	2.69514
hsa-miR-147b	7	0.0460664	0.572691	0.240155	0	0.0999958	0.237048	0.0960888	0.673786
hsa-miR-154	7	2.74095	4.19974	2.6074	0	0.599975	15.4871	0.999324	2.8789
hsa-miR-16	7	117.746	805.804	176.342	39.9976	155.494	323.254	274.122	280.846
hsa-miR-299-3p	7	4.26114	7.77224	1.86978	0	0.299988	3.35818	0.230613	0.36752
hsa-miR-337-3p	7	10.7795	23.944	8.13096	0.174917	3.24987	16.2773	7.43727	11.0868
hsa-miR-337-5p	7	4.16901	18.4898	3.79102	0	0.449981	1.73835	2.07552	1.9601
hsa-miR-376a	7	127.258	250.702	166.05	0.466444	13.6994	113.111	34.1307	58.8644
hsa-miR-376c	7	92.939	229.24	133.286	0.349833	12.8995	146.693	28.4615	41.836
hsa-miR-379star	7	11.77	14.3718	5.04325	0	0.549977	8.45471	0.403573	0.980052
hsa-miR-411	7	12.6683	38.3976	14.8553	0	1.64993	27.0235	1.5182	2.8789
hsa-miR-411star	7	14.9716	18.8443	6.72434	0	1.34994	12.1289	0.403573	1.10256
hsa-miR-412	7	0.207299	1.66353	0.446002	0	0.0499979	0.0790159	0.0192178	0.0612533
hsa-miR-431	7	7.23242	4.9906	1.59531	0	6.09975	0.908683	0.0960888	0.428773
hsa-miR-432star	7	0.667963	1.58172	0.78908	0	0.0499979	1.77786	0.0384355	0.122507
hsa-miR-433	7	1.19773	13.1719	5.45495	0	1.69993	29.552	0.0960888	0.245013
hsa-miR-490-3p	7	0.0230332	0.845402	0.377386	0	0.799967	3.59523	45.7191	0.122507
hsa-miR-493	7	1.52019	0.79086	0.514618	0.0583055	0.0499979	0.513604	0.384355	0.673786
hsa-miR-493star	7	9.88124	20.1533	3.48225	0	0.499979	0.553112	2.51753	2.20512
hsa-miR-496	7	0.737062	11.372	1.83547	0	1.69993	4.42489	0.0384355	0.306266
hsa-miR-541star	7	0.0230332	0.245439	0	0	0.0499979	0.553112	0.0192178	0.122507
hsa-miR-585	7	0.0230332	0.0818131	0.0343078	0	0.0499979	0.316064	0.0576533	1.16381
hsa-miR-599	7	0.0460664	0	0.0343078	0	0.0999958	0	0.0192178	0.18376
hsa-miR-616	7	0.0230332	0.0818131	0.274463	0	0.24999	0.19754	0.153742	0.0612533
hsa-miR-618	7	0.483697	1.55445	1.64678	0.0583055	0.299988	0.474096	2.78658	0.857546
hsa-miR-624star	7	0.138199	0.763589	0.686157	0.116611	0.24999	0.19754	0.326702	0.306266
hsa-miR-628-3p	7	0.0690996	0.736318	0.566079	0	1.09995	4.34588	0.711057	0.673786
hsa-miR-642	7	0.0690996	0.654504	0.188693	0	0.24999	12.3265	3.42076	1.40883
hsa-miR-654-5p	7	0.184266	0.763589	0.223001	0	0.649973	0.59262	0.0384355	0.0612533
chr1:158136402-158136482:-:NSC	8	0	0.027271	0.0171539	0	0.199992	0	0	0
chr10:126711352-126711417:-:NSC	8	0	0	0	0	0.0999958	0	0	0
chr11:11718220-11718271:-:NSC	8	0.161232	0.027271	0.102924	0	0.149994	0	0	0.796292
chr15:64119636-64119715:+:ESC	8	1.93479	0.79086	1.54385	1.16611	1.24995	0.39508	0.153742	0.612533
chr15:91038009-91038073:-:ESC	8	4.03081	0.027271	0.0171539	28.6863	0.199992	0	0	0.18376
chr2:69184328-69184385:+:NSC	8	0.115166	0.681775	0.360232	0.233222	0.549977	0	0	0.0612533
chr20:61388616-61388654:+:NSC	8	0.161232	2.23622	0.892004	0.52475	4.19983	0.474096	0.17296	0.122507
chr21:30669492-30669556:-:ESC	8	2.21119	1.33628	0.806234	0.583055	0.299988	0.118524	0	0.122507
chr5:127627965-127628007:+:ESC-NSC	8	8.15375	15.2445	3.79102	3.78986	2.54989	0.790159	0.422791	1.59258
chr6:110990177-110990231:-:NSC	8	2.34939	5.72691	1.37231	2.50714	12.0995	1.61983	0.0960888	4.47149
chr9:132007407-132007472:+:ESC	8	0	0	0	0	0.0499979	0	0	0
chr9:138845241-138845287:+:ESC	8	0.368531	0.054542	0.137231	0.233222	0.0999958	0.039508	0.0192178	0.122507
chrX:113792287-113792343:+:ESC	8	2.78702	0.627233	0.120077	8.04616	0.649973	4.78046	0	0
hsa-miR-105star	8	2.46455	0.599962	1.09785	0.757972	0.199992	1.06672	0	0
hsa-miR-106a	8	1767.82	3752.52	930.755	2547.83	6378.29	843.535	211.28	752.129
hsa-miR-106astar	8	8.61442	9.95392	5.71226	12.3025	9.7496	1.34327	0.0384355	2.51138
hsa-miR-106b	8	191.797	515.913	81.7213	337.181	780.868	165.973	42.2983	180.391
hsa-miR-106bstar	8	31.6015	112.411	41.1694	42.9712	152.144	48.9109	8.32129	22.7862
hsa-miR-1226star	8	0.0230332	0.027271	0	0.116611	0.149994	0	0	0
hsa-miR-1254	8	1.86569	5.31785	1.0807	2.21561	6.69972	0.553112	0.230613	0.245013
hsa-miR-1276	8	0.0460664	1.00903	0.154385	0.408139	2.3999	0.0790159	0	0
hsa-miR-1285	8	1.38199	5.75418	0.840542	1.51594	7.2997	1.65933	0.442009	1.22507
hsa-miR-1286	8	0.115166	0.27271	0.0171539	0.233222	0.199992	0.0790159	0.0384355	0.0612533
hsa-miR-1292	8	1.63536	4.71789	1.38947	1.39933	3.79984	1.26426	0.461226	0.551279
hsa-miR-1303	8	0.760096	0.436336	0.240155	1.51594	0.449981	0.19754	0.0384355	0.245013
hsa-miR-1306	8	0.184266	1.77262	0.0857696	0.349833	2.54989	0.513604	0.17296	0.18376
hsa-miR-130a	8	1159.15	6466.97	872.946	784.85	2374.6	179.524	271.758	780.734
hsa-miR-130astar	8	1.88872	12.5992	5.40348	14.2848	41.5483	1.73835	1.63351	4.28773
hsa-miR-130b	8	205.525	2887.32	301.137	262.2	1726.18	48.4763	19.9865	27.8702
hsa-miR-130bstar	8	4.21508	85.6855	25.8338	15.8591	319.437	11.1017	1.13385	4.7165
hsa-miR-135astar	8	0.0460664	0.245439	0.823388	0.174917	7.69968	0.0790159	0.0384355	0.0612533
hsa-miR-135bstar	8	0.299432	4.39063	0.154385	1.69086	0.999959	0.158032	0.0384355	1.16381
hsa-miR-15bstar	8	12.461	29.0982	2.6074	16.8503	74.3969	15.2106	5.47706	7.96292
hsa-miR-17	8	1786.73	3788.49	954.153	2561.24	6411.18	866.449	215.297	764.869
hsa-miR-18a	8	259.907	776.733	25.5765	267.098	397.234	25.1666	5.6308	20.9486
hsa-miR-18astar	8	6.74873	7.17228	0.994927	10.5533	29.0488	3.39769	0.0576533	1.40883
hsa-miR-18b	8	252.928	765.525	23.8954	257.594	382.234	24.4159	5.24645	20.2748
hsa-miR-18bstar	8	0.483697	0.736318	0.308771	7.4631	13.6494	0.118524	0	0.18376
hsa-miR-19a	8	5280.78	8207.19	3105.03	1837.09	1881.62	523.599	355.817	802.663
hsa-miR-19b	8	7508.11	11540.8	6419.53	2773.42	3143.37	920.536	605.955	1434.49
hsa-miR-19b-1star	8	22.5495	33.0252	8.54265	22.4476	21.2491	4.66194	2.24848	6.43159
hsa-miR-19b-2star	8	21.9737	32.2889	8.35396	22.6225	21.0491	4.62243	2.21004	6.43159
hsa-miR-20a	8	1375.61	3122.1	429.5	1876.85	4466.51	430.637	93.4368	334.32
hsa-miR-20astar	8	19.417	18.9534	7.23895	11.3696	14.4994	4.26686	0.69184	7.84042
hsa-miR-20b	8	786.054	1593.39	161.693	1443.12	3405.16	153.172	19.4868	132.185
hsa-miR-20bstar	8	51.364	65.7232	7.34188	53.9909	65.1973	1.18524	0	2.69514
hsa-miR-219-1-3p	8	0.0460664	6.40869	0.154385	0.583055	51.9978	0.19754	0.0192178	0.122507
hsa-miR-222star	8	13.6357	23.8894	3.91109	6.53022	17.6493	0.237048	0.326702	1.47008
hsa-miR-25	8	288.237	482.233	245.73	172.001	526.628	136.698	49.0245	127.958
hsa-miR-25star	8	3.45498	8.69945	0.96062	8.22108	37.7984	1.77786	0.115307	2.14386
hsa-miR-301a	8	253.734	4010.26	1305.31	163.43	478.78	49.1084	22.1004	34.1181
hsa-miR-301b	8	23.5399	826.421	151.572	22.3893	124.895	1.54081	0.51888	0.612533
hsa-miR-32star	8	3.40891	5.01787	0.583233	2.74036	2.3499	1.61983	0.711057	4.04272
hsa-miR-33bstar	8	3.10948	3.05435	0.531772	1.34103	1.04996	0.276556	0.288266	0.306266
hsa-miR-363	8	157.685	339.879	188.367	228.091	313.087	40.6932	2.76736	67.8686
hsa-miR-421	8	94.1136	408.22	188.179	72.6487	192.292	91.9746	37.7053	31.1779
hsa-miR-454star	8	1.12863	11.9992	3.55086	2.44883	19.8992	3.91129	0.69184	1.22507
hsa-miR-548b-3p	8	0.852228	3.1089	0.0686157	0.583055	1.39994	0.316064	0.0384355	0.551279
hsa-miR-548p	8	0.0921328	0.327252	0.0857696	0.174917	0.499979	0.039508	0.0768711	0.122507
hsa-miR-550	8	4.14598	14.1537	5.90095	5.07258	47.148	8.65225	3.76668	5.20653
hsa-miR-550star	8	4.88304	15.7899	6.7758	6.76344	54.3977	10.5881	5.47706	6.92162
hsa-miR-551a	8	16.6991	53.533	15.3356	23.089	69.4471	2.56802	0.595751	1.9601
hsa-miR-551bstar	8	0.760096	17.9716	1.50954	2.21561	22.3491	0.158032	0	0.306266
hsa-miR-556-3p	8	0.184266	0.981757	1.09785	0.233222	0.549977	0.0790159	0.153742	0.551279
hsa-miR-561	8	5.7583	5.07241	1.26939	2.62375	2.4499	0.19754	0.115307	0.306266
hsa-miR-597	8	0.276398	2.42712	1.0807	0.583055	1.24995	0.711144	0.326702	0.306266
hsa-miR-629	8	5.18247	14.5355	3.24209	5.77224	16.5493	4.06932	0.538097	6.98287
hsa-miR-629star	8	2.62578	10.6357	2.00701	5.13088	12.9495	2.76556	0.249831	5.14527
hsa-miR-636	8	0.138199	1.17265	0.171539	0.291528	3.59985	0.237048	0.17296	0.306266
hsa-miR-643	8	0.690996	0.927215	0.154385	0.52475	0.599975	0.434588	0.134524	0.36752
hsa-miR-665	8	2.99432	9.54486	0.771926	0.408139	0.649973	0.237048	0.17296	0.980052
hsa-miR-671-5p	8	5.02124	36.1341	6.22687	3.90647	15.7493	2.64703	0.480444	9.433
hsa-miR-767-5p	8	9.92731	3.08163	1.56101	5.48072	2.84988	9.00782	0	0
hsa-miR-92a-1star	8	31.4864	4.96333	1.49239	57.4309	125.895	0.908683	0.980106	6.49285
hsa-miR-92a-2star	8	2.44152	4.49972	0.0686157	7.4048	21.5991	0.039508	0.0768711	0.306266
hsa-miR-92bstar	8	5.2055	25.662	3.56802	16.6171	174.893	4.62243	0.0768711	1.59258
hsa-miR-939	8	0.115166	0.027271	0.0686157	0	0.299988	0	0	0.122507
hsa-miR-93star	8	23.8624	74.3135	25.0104	47.1692	205.991	26.0358	4.30478	18.1922
chr2:207682965-207683031:-:ESC-NSC	9	3.33981	63.4597	26.2798	1.28272	7.99967	7.62504	2.9211	6.12533
chr4:7512666-7512736:+:ESC	9	0.138199	0.0818131	0.0686157	0	0	0.039508	0.0576533	0
chr9:90550580-90550629:-:NSC	9	0.57583	6.4905	3.15632	0.408139	1.04996	1.14573	0.17296	0.551279
hsa-miR-100star	9	0.0921328	1.82716	0.377386	0.116611	0.0999958	0.790159	0.192178	0.36752
hsa-miR-103	9	4495.94	37058.8	12442.6	2049.5	10447.7	9037.8	3990.86	4117.87
hsa-miR-107	9	4474.52	36980.7	12391.4	2047.11	10427.2	9030.85	3972.58	4115.06
hsa-miR-1185	9	0.0921328	0.518149	0.771926	0	0.149994	1.81737	0.0768711	0
hsa-miR-127-3p	9	12.2306	33.8706	13.5688	0.291528	14.1994	126.505	4.4393	11.6994
hsa-miR-127-5p	9	6.56446	10.663	10.6011	0.0583055	0.999959	15.2106	1.42211	1.34757
hsa-miR-134	9	4.67574	36.2159	8.33681	0.0583055	11.9995	52.1505	1.1915	8.45295
hsa-miR-135a	9	169.686	1205.32	2336.62	102.384	299.288	364.738	56.5771	420.442
hsa-miR-148bstar	9	1.03649	8.45402	1.71539	0.349833	0.849965	2.01491	1.7296	1.65384
hsa-miR-153	9	0.944361	84.1584	124.64	0.583055	10.8495	52.9012	0.864799	0.122507
hsa-miR-154star	9	56.3162	27.4619	10.5325	0.0583055	3.84984	42.2735	0.51888	3.06266
hsa-miR-299-5p	9	34.0661	79.1405	41.9928	0.0583055	2.69989	49.6615	7.82163	2.81765
hsa-miR-323-3p	9	41.2985	245.712	112.392	0.291528	50.8979	417.244	1.1915	3.98146
hsa-miR-329	9	10.7335	40.552	29.2131	0.0583055	10.6996	174.941	1.17228	2.20512
hsa-miR-33astar	9	9.16721	76.7406	41.6669	11.3113	19.0492	20.3861	11.6844	13.6595
hsa-miR-34astar	9	9.23631	34.8251	14.0491	9.5038	9.44961	22.5591	6.45717	12.7407
hsa-miR-34c-5p	9	5.66617	45.2972	1.35516	1.98239	2.04991	37.7696	0.384355	2.32762
hsa-miR-369-3p	9	0.714029	3.02708	0.583233	0.174917	0.149994	10.8647	0.17296	1.10256
hsa-miR-369-5p	9	8.95991	27.5983	18.7835	0.0583055	2.3999	19.6355	2.47909	2.26637
hsa-miR-370	9	11.6778	54.2693	3.29355	0.116611	15.2494	83.994	0.326702	2.38888
hsa-miR-376astar	9	1.38199	12.0538	7.03311	0.408139	0.499979	19.7935	0.960888	1.53133
hsa-miR-376b	9	70.9192	102.403	34.8053	0.233222	3.89984	13.6303	2.7097	3.49144
hsa-miR-377star	9	0.967394	1.39082	1.28654	0.0583055	0.749969	8.37569	0.192178	0.490026
hsa-miR-379	9	12.7374	33.3797	16.6221	0.116611	3.74984	107.541	2.42144	6.43159
hsa-miR-380	9	13.4284	22.5804	7.59919	0.0583055	1.49994	17.502	0.0960888	0.36752
hsa-miR-380star	9	0.207299	0.899944	0.257309	0	0.199992	0.869175	0	0
hsa-miR-381	9	32.8453	30.5435	16.7422	0.0583055	1.84992	25.5222	2.2677	4.16522
hsa-miR-382	9	20.7068	104.666	18.3032	0.233222	27.0989	160.244	3.15171	9.18799
hsa-miR-409-3p	9	274.878	754.344	2.59024	0.291528	92.6962	184.858	19.5829	22.8475
hsa-miR-409-5p	9	9.60484	22.0077	9.40035	0.116611	3.24987	29.8285	0.538097	1.47008
hsa-miR-425	9	70.9192	169.053	103.593	32.4179	148.394	207.93	17.8725	35.0369
hsa-miR-431star	9	2.92522	11.8902	3.85963	0.0583055	1.59993	16.5933	0.134524	0.245013
hsa-miR-454	9	0.207299	10.3357	0.377386	0.0583055	0.499979	0.513604	0.153742	0.122507
hsa-miR-485-3p	9	4.39934	7.30863	5.26625	0.233222	2.4499	20.5837	0.403573	0.673786
hsa-miR-487a	9	37.7744	70.9865	38.562	0.174917	2.79988	49.7405	1.63351	1.47008
hsa-miR-487b	9	46.0894	163.108	101.654	0.0583055	9.94959	263.558	4.38165	5.69655
hsa-miR-494	9	175.098	327.225	157.49	0.466444	22.8491	67.0055	15.2013	19.9686
hsa-miR-495	9	39.3868	110.693	28.7671	0.174917	27.5989	424.434	5.57315	17.886
hsa-miR-539	9	2.53365	14.3718	3.87679	0.233222	3.54985	35.9523	0.115307	0.980052
hsa-miR-543	9	17.344	43.3609	11.9391	0.699666	24.899	98.0983	0.980106	4.53274
hsa-miR-544	9	0.829195	2.5362	1.33801	0	0	4.22735	0.0768711	0.0612533
hsa-miR-545	9	3.06342	28.1982	15.267	4.02308	0.949961	3.23965	2.80579	2.02136
hsa-miR-545star	9	7.62399	44.2609	16.4163	5.59733	5.34978	4.9385	6.45717	4.59399
hsa-miR-654-3p	9	24.968	56.2056	3.75671	0.233222	16.9493	29.3939	3.05562	6.92162
hsa-miR-655	9	1.01346	1.14538	0.909158	0.0583055	0.0999958	3.87178	0.269049	0.428773
hsa-miR-656	9	1.93479	6.19052	2.02416	0.174917	0.749969	29.2754	0.461226	1.22507
hsa-miR-668	9	0.115166	1.2272	0.87485	0	1.29995	8.25717	0.0576533	0
hsa-miR-758	9	1.65839	5.09968	1.01208	0.174917	1.64993	2.44949	0.0576533	0.306266
hsa-miR-770-5p	9	2.57972	9.46304	6.46703	0	0.649973	26.8259	0.0960888	0.0612533
hsa-miR-875-5p	9	0	0.027271	0	0	0	0.0790159	0	0
hsa-miR-889	9	3.98474	4.09065	2.6074	0	0.199992	7.46701	0.153742	0
chr1:204766775-204766819:-:NSC	10	0	0.136355	0.0686157	0.291528	0.299988	0.118524	0.153742	1.47008
chr1:3034410-3034450:+:NSC	10	0.0460664	4.88151	2.8304	0.699666	1.54994	6.75586	0.557315	6.18658
chr10:14465213-14465272:-:NSC	10	0.138199	9.29942	5.71226	3.61494	19.3992	47.7256	6.30343	77.9142
chr11:112847579-112847615:-:NSC	10	0	0.709046	0.325924	0	0.0499979	0.039508	0.960888	0.306266
chr11:1837279-1837331:-:NSC	10	0	0.190897	0.0343078	0.0583055	0.24999	0.039508	0.269049	0.122507
chr11:81279440-81279515:-:NSC	10	0	0.245439	0.0343078	0.408139	0.349985	0.869175	0.499662	1.47008
chr12:25828503-25828571:-:NSC	10	2.32635	469.552	510.878	2.74036	244.64	921.089	28.6921	248.933
chr12:25918229-25918268:-:NSC	10	0	0.136355	0.0514618	0	0.0499979	0.118524	0.557315	0.551279
chr13:99093325-99093395:+:ESC-NSC	10	0.0230332	0.27271	0.154385	0.233222	0.799967	4.42489	0.288266	1.8376
chr14:86018496-86018537:+:NSC	10	0.115166	4.82697	0.78908	0.932888	2.89988	7.9411	5.01584	1.59258
chr15:65103043-65103088:-:NSC	10	0	0.0818131	0.0171539	0.291528	0.699971	6.55832	0.614968	2.38888
chr17:7932110-7932181:+:NSC	10	0	0.109084	0.223001	0	0.349985	0.711144	0.153742	0.428773
chr18:40804054-40804118:-:NSC	10	0.115166	2.80891	11.2358	0.583055	6.39973	35.5572	2.30613	8.88172
chr19:10202102-10202150:+:NSC	10	0	0.245439	0.154385	0.116611	0.149994	0.039508	0.922453	0.0612533
chr19:47329447-47329493:-:NSC	10	1.47412	14.29	6.29549	1.39933	10.9495	12.4845	1.42211	5.08402
chr19:54503875-54503926:-:NSC	10	3.13251	632.906	804.793	9.79532	710.121	2587.38	61.4584	675.562
chr2:110184836-110184897:-:NSC	10	0.0460664	1.33628	0.548925	0.116611	0.499979	1.14573	0.768711	0.306266
chr3:67358589-67358632:+:NSC	10	0	12.8446	5.38633	0	0.449981	0.790159	2.5944	0.0612533
chr3:75870132-75870195:+:NSC	10	0	0.109084	0.0857696	0.116611	0.149994	0.039508	0.634186	0.796292
chr4:52502278-52502339:+:NSC	10	1.15166	21.6532	26.0053	22.8558	139.694	264.624	24.8294	581.722
chr7:30876396-30876461:-:NSC	10	0	1.2272	0.257309	0.991194	0.699971	1.22475	16.7002	11.5156
chr7:62718914-62718973:+:NSC	10	0	0.027271	0.0343078	0	0.149994	0.039508	0.269049	0.122507
chr8:10561909-10561981:+:NSC	10	28.7685	374.186	326.988	40.464	318.987	139.779	61.9965	259.653
chr8:41239384-41239419:+:NSC	10	0	0.299981	0.0857696	0.349833	0.449981	1.65933	0.499662	28.9115
chr9:130047055-130047115:-:NSC	10	0	0.381794	0.0343078	0.0583055	0.399983	0.118524	0.0768711	0.18376
chrX:111910611-111910661:-:NSC	10	0	0.845402	4.03117	0	9.39961	20.4256	0.538097	11.5156
hsa-let-7cstar	10	0	0.109084	0.205847	0	0.699971	0.908683	0.0192178	0.0612533
hsa-let-7dstar	10	0	1.96351	0.857696	0.174917	2.64989	92.9228	5.74611	27.7477
hsa-let-7estar	10	0.0230332	1.85443	0.102924	0.0583055	1.69993	5.64964	0.230613	5.20653
hsa-miR-100	10	11.77	3116.8	4214.56	13.8184	2037.77	4815.98	1147.57	5172.9
hsa-miR-1179	10	0.184266	0.218168	0.806234	0.233222	1.89992	12.6426	1.03776	0.673786
hsa-miR-1226	10	0.760096	17.3444	6.58711	3.2068	37.6484	21.2948	1.36446	3.12392
hsa-miR-1228	10	0.0690996	1.00903	0.39454	0.52475	3.79984	2.56802	0.230613	0.428773
hsa-miR-1247	10	0.483697	4.28155	1.9727	0.116611	40.2483	2.52851	0.653404	2.14386
hsa-miR-125a-3p	10	0.760096	15.6263	2.6074	1.34103	5.59977	5.84718	1.4029	10.2293
hsa-miR-125a-5p	10	53.4831	2991.06	1955.65	159.582	1059.86	4881.61	779.069	5111.4
hsa-miR-125b	10	51.1567	8924.14	11066.3	75.6222	5599.32	22262.6	1042.06	6141.74
hsa-miR-125b-1star	10	0.115166	3.32706	0.669003	0.291528	2.64989	5.25456	0.230613	1.8376
hsa-miR-125b-2star	10	0.115166	30.3254	30.7227	0.233222	45.4981	106.948	10.7619	27.1352
hsa-miR-1271	10	1.05953	9.89938	5.79803	0.874583	10.9495	13.7883	4.61226	5.20653
hsa-miR-1284	10	0	0.245439	0.188693	0	0.0499979	0.039508	0	0.18376
hsa-miR-1287	10	0.299432	14.8354	4.70017	2.97358	6.49973	12.6821	15.355	6.37034
hsa-miR-1301	10	1.63536	22.2532	2.35009	1.98239	41.5983	41.6019	2.03708	9.98428
hsa-miR-132	10	0.322465	40.2793	21.6654	1.34103	341.086	691.627	7.49493	82.5081
hsa-miR-137	10	0	6.92684	9.09158	0.0583055	4.29982	108.765	0.0576533	0.306266
hsa-miR-148b	10	7.09423	65.805	31.3917	4.43122	19.4492	57.3656	21.0819	46.2462
hsa-miR-149	10	2.41849	113.911	125.927	9.85363	478.83	762.385	11.7805	30.1979
hsa-miR-149star	10	0	0.054542	0.0171539	0.116611	0.899963	0.039508	0.0192178	0
hsa-miR-181a	10	2.87915	549.675	186.823	13.2937	907.712	4346.79	104.641	739.511
hsa-miR-181a-2star	10	1.19773	288.173	47.5507	3.96477	110.845	51.0838	18.8334	25.6039
hsa-miR-181astar	10	0.50673	83.3948	6.20972	1.16611	51.1979	116.588	5.6308	27.1352
hsa-miR-181b	10	3.82351	841.993	39.2653	28.4531	1137.4	2242.39	25.5981	246.361
hsa-miR-181cstar	10	0.714029	32.3162	9.02296	1.1078	7.79968	81.8605	6.78387	26.3389
hsa-miR-181d	10	2.48759	377.813	18.2175	18.3662	726.67	1063.59	10.8004	124.834
hsa-miR-191	10	302.679	1458.02	864.026	331.408	1550.99	2317.06	848.618	1461.38
hsa-miR-191star	10	0.322465	3.81794	0.634695	1.86578	4.6998	3.31867	0.749493	0.918799
hsa-miR-197	10	2.07299	30.7344	27.1375	10.9614	115.395	170.635	64.6678	38.9571
hsa-miR-210	10	37.5441	249.257	137.18	142.615	341.136	80.5963	176.323	191.6
hsa-miR-212	10	0.0460664	8.07222	2.35009	0.0583055	47.798	47.8442	0.653404	8.5142
hsa-miR-216b	10	0	0.981757	2.23001	1.22442	15.8493	0.908683	0.0192178	10.5968
hsa-miR-217	10	0.0230332	1.0363	4.08263	0.291528	8.39965	0.513604	0.0960888	4.53274
hsa-miR-218	10	41.1834	3589.68	1020.88	72.7653	275.739	1507.19	257.364	360.169
hsa-miR-218-1star	10	0.138199	11.8084	3.22494	0.583055	0.949961	0.59262	0.922453	1.34757
hsa-miR-218-2star	10	0.0460664	1.11811	0.514618	0.116611	0.449981	0.948191	0.0960888	0.18376
hsa-miR-221star	10	2.62578	5.99962	3.91109	2.21561	14.0494	14.934	5.6308	8.88172
hsa-miR-224	10	2.34939	33.2979	3.55086	5.01427	6.34974	7.03242	11.2808	13.537
hsa-miR-23astar	10	0.0690996	0.518149	0.120077	0.349833	0.299988	0.118524	0.211395	0.18376
hsa-miR-23bstar	10	0.0460664	1.74535	0.154385	0.174917	7.59968	3.00261	0.422791	2.51138
hsa-miR-27bstar	10	1.49716	34.716	2.04132	2.44883	27.4989	11.5758	17.9302	27.0739
hsa-miR-28-3p	10	10.7565	94.8486	31.5461	15.9757	78.7967	57.9582	20.6783	72.1563
hsa-miR-28-5p	10	67.6715	404.456	54.6009	59.8798	220.241	695.261	69.1455	357.719
hsa-miR-30c-1star	10	0.115166	0.845402	0.428848	0.349833	0.499979	1.06672	0.807146	0.980052
hsa-miR-30c-2star	10	0.0230332	2.99981	5.55787	0.583055	14.1994	2.13343	1.69116	17.8247
hsa-miR-30d	10	24.4152	1731	842.566	59.1801	659.823	1419.28	1109.17	3805.24
hsa-miR-324-5p	10	1.98086	56.2056	34.2049	2.68205	30.5487	48.5553	5.47706	22.3574
hsa-miR-326	10	1.33593	7.11774	2.8304	2.21561	12.9995	100.903	2.99797	21.8062
hsa-miR-328	10	0.115166	2.34531	4.49433	0.699666	41.3483	468.92	1.7296	56.7205
hsa-miR-338-3p	10	1.17469	17.9989	15.9703	3.67325	36.4985	1485.97	53.6368	37.242
hsa-miR-339-3p	10	1.77356	18.5443	12.7454	3.03189	19.5992	17.3835	3.88199	10.2905
hsa-miR-339-5p	10	15.962	103.957	38.7507	22.7975	233.19	72.6157	18.2569	64.8672
hsa-miR-33b	10	0.437631	3.16344	0.977773	0.52475	1.54994	25.2851	1.5182	0.980052
hsa-miR-340	10	2.28029	22.1441	24.29	3.90647	16.6993	120.262	2.80579	12.3119
hsa-miR-340star	10	7.62399	77.9406	83.917	11.253	132.095	151.118	13.1257	18.376
hsa-miR-342-3p	10	23.4017	290.273	278.7	34.0504	413.833	856.138	127.356	21.0711
hsa-miR-345	10	10.6874	175.789	41.7698	14.8679	113.895	38.8758	21.3702	44.1023
hsa-miR-346	10	0.0690996	1.58172	1.37231	0.0583055	12.1995	97.1106	0.269049	0.428773
hsa-miR-361-3p	10	4.53754	39.3248	19.7785	8.92074	55.5477	176.008	24.4258	87.5309
hsa-miR-361-5p	10	15.271	49.8242	49.592	30.5521	112.595	307.293	32.7279	189.334
hsa-miR-425star	10	3.59318	12.3265	11.0814	8.04616	27.8988	41.7204	6.95683	14.9458
hsa-miR-455-3p	10	37.0374	834.084	155.397	28.1033	111.445	54.5605	145.632	401.515
hsa-miR-483-3p	10	0	2.04533	1.59531	0.641361	3.39986	2.05441	5.89985	5.81906
hsa-miR-484	10	51.5944	379.503	161.504	134.044	996.659	352.846	69.453	192.029
hsa-miR-488	10	0	0.245439	0.703311	0.116611	0.299988	5.21505	0.0384355	0
hsa-miR-491-3p	10	0.230332	1.11811	0.926312	0.466444	1.59993	6.24226	0.768711	0.245013
hsa-miR-491-5p	10	0.276398	1.82716	0.566079	0.52475	1.64993	16.9884	1.55664	0.980052
hsa-miR-532-3p	10	1.05953	6.43596	9.29742	3.03189	17.4493	15.2106	7.91772	24.6238
hsa-miR-549	10	0.0230332	0.490878	0.0857696	0.0583055	0.299988	1.4618	0.0576533	0.18376
hsa-miR-576-5p	10	0.161232	1.0363	0.926312	0.874583	2.4499	2.84457	0.307484	1.9601
hsa-miR-579	10	0.414598	1.90897	0.583233	0.583055	1.09995	0.869175	0.442009	1.10256
hsa-miR-582-3p	10	0.161232	5.836	5.0261	0.991194	14.2994	66.4524	1.74882	25.6039
hsa-miR-582-5p	10	0.207299	7.25409	6.31264	0.874583	18.1992	86.9966	2.42144	28.054
hsa-miR-584	10	0.0230332	2.56348	0.120077	0.0583055	1.79993	72.1416	1.53742	0.796292
hsa-miR-615-3p	10	0	0.299981	0.0686157	0.174917	0.849965	0.039508	0.134524	25.0526
hsa-miR-628-5p	10	0.368531	10.1721	7.53057	0.932888	6.29974	95.6883	12.8375	13.3532
hsa-miR-7-2star	10	0.483697	4.03611	4.28848	0.583055	8.34965	50.1356	4.40087	0.796292
hsa-miR-887	10	3.59318	57.5691	7.51342	5.3058	40.8983	41.8389	7.05292	9.12674
hsa-miR-937	10	0	0.54542	0.223001	0.583055	5.14979	0.434588	0.0768711	0.428773
hsa-miR-943	10	0	0.245439	0	0.0583055	0.899963	0.316064	0.0384355	0
hsa-miR-99a	10	20.799	5237.51	8341.63	14.5764	4444.72	7682.96	2044.17	5214.12
hsa-miR-99astar	10	0.115166	11.9992	44.1885	0.116611	11.0995	47.1725	20.6975	51.514
hsa-miR-99b	10	25.4517	1379.31	389.497	37.607	255.289	409.5	192.946	373.706
chr1:37399762-37399813:+:NSC	11	0	0.054542	0.120077	0.0583055	0.149994	0	0.0384355	0.36752
chr1:4322324-4322387:-:NSC	11	0.276398	2.29077	1.32085	0.52475	1.44994	0.118524	0.653404	1.28632
chr10:114383930-114383994:+:NSC	11	0.322465	1.44536	2.04132	0.408139	1.19995	0	0.288266	0.245013
chr10:131531562-131531617:-:NSC	11	0	0	0	0.116611	0	0	0	0.0612533
chr14:54414588-54414652:-:NSC	11	0.0460664	0.27271	0.463156	0.0583055	0.0499979	0.039508	0.249831	0.0612533
chr17:63011177-63011218:-:ESC	11	23.8163	0.027271	0.120077	15.6842	0.149994	0	0.0192178	0.122507
chr19:2201649-2201708:+:NSC	11	0.0230332	0.027271	0.0514618	0.291528	0.699971	0	0.0192178	0.245013
chr2:11894519-11894552:-:NSC	11	0	0.518149	0.0686157	0.0583055	0	0	0.288266	0.796292
chr2:220479476-220479519:-:NSC	11	0.161232	0.245439	0.0343078	0.291528	0.24999	0	0.595751	0.245013
chr2:239892105-239892168:+:NSC	11	0	0.109084	0	0.0583055	0	0	0	0.245013
hsa-miR-10astar	11	0	0.109084	0	0.0583055	0	0	0.365138	12.6182
hsa-miR-10bstar	11	0	0.0818131	0.0171539	0.0583055	0	0	0.653404	29.3403
hsa-miR-1228star	11	0.0921328	0.0818131	0.154385	0.291528	0.24999	0	0.0384355	0.0612533
hsa-miR-148astar	11	1.93479	0.381794	0.0514618	1.51594	0.0999958	0.039508	0.134524	1.53133
hsa-miR-186star	11	1.03649	3.87248	1.86978	1.0495	1.04996	0.513604	1.17228	1.04131
hsa-miR-200cstar	11	1.03649	0.218168	0	0.174917	0	0	0	1.47008
hsa-miR-21star	11	5.87347	100.794	7.41049	3.61494	7.79968	2.29146	2.99797	39.7534
hsa-miR-302bstar	11	99.2961	0.354523	0.0857696	41.7467	0.24999	0	0.134524	0.0612533
hsa-miR-302cstar	11	128.111	0.490878	0.102924	119.643	1.44994	0	0.0384355	0.245013
hsa-miR-302dstar	11	214.739	0.654504	0.0857696	179.989	3.74984	0	0.0960888	0.0612533
hsa-miR-367	11	320.737	1.6908	0.343078	125.299	0.549977	0	0.115307	0.245013
hsa-miR-503	11	1.75052	24.9803	1.56101	1.69086	2.3499	0.948191	3.09406	8.26919
hsa-miR-512-3p	11	24.5304	0.054542	0.0171539	12.5357	0	0	0.768711	0.0612533
hsa-miR-520e	11	11.102	0.0818131	0.0171539	7.17158	0	0	0.153742	0.0612533
hsa-miR-525-5p	11	5.04427	0.027271	0.0171539	3.73155	0	0	0.230613	0.0612533
hsa-miR-548g	11	1.63536	0.027271	0.120077	0.233222	0	0	0.192178	0.0612533
hsa-miR-605	11	0.0230332	0.027271	0.0343078	0.291528	0.149994	0	0.0768711	0.0612533
hsa-miR-659	11	0.0230332	0.054542	0.0514618	0.233222	0	0	0.0384355	0.18376
hsa-miR-886-3p	11	15.939	79.5223	8.06234	7.87124	4.59981	1.4618	5.32332	7.41164
hsa-miR-886-5p	11	18.0811	108.675	0.96062	11.9526	12.4495	5.13604	20.8897	64.1934
hsa-miR-96star	11	6.61053	0.163626	0.0343078	3.90647	0	0	0	0.612533
