# Supplementary material for: Ago2 Immunoprecipitation Identifies Predicted MicroRNAs in Human Embryonic Stem Cells and Neural Precursors
Source: PLoS One. 2009 Sep 28;4(9):e7192. doi: 10.1371/journal.pone.0007192 (PMC2745660; doi:10.1371/journal.pone.0007192)
Supplement: File S3 — qPCR assay of Ago2 immunoprecipitated samples. Predicted microRNAs were assayed in small RNA SREK libraries by SYBR green qPCR (SYBR Green Master Mix, Applied Biosystems) using one microRNA-specific primer and one primer specific for the library (5′-CTC CTG TAC GGC CAA GGC G-3′). Custom microRNA probes were designed by synthesizing DNA oligos identical to the probed RNAs. Results show the Ct value (mean of two technical replicates) for each RNA. The “delCt” was calculated by subtracting the detected Ct for the spiked-in NCode control small RNA (see text). If qPCR product was not observed for a probe (blank entry in Ct column), 40 cycles was substituted to calculate the minimum observable quantity of target. The “deldelCt” subtracts the delCt for IgG background from the Ago2 delCt, and the resulting value is used to calculate relative quantity (RQ) by raising 2 to the power of the deldelCt. In this case, RQ refers to the relative enrichment of the target RNA by Ago2 IP over background IgG IP. (0.05 MB XLS) [file pone.0007192.s012.xls]

## Sheet: Ago2 qPCR Results
Probe	Probe Code	Ago2-ESC Ct Mean	Ago2-ESC delCt	IgG-ESC-Ct Mean	IgG-ESC-delCt	deldelCt	RQ	Ago2-NSC-Ct Mean	Ago2-NSC-delCt	IgG-NSC-Ct Mean	IgG-NSC-delCt	deldelCt	RQ
hsa-let-7a MIMAT0000062	A1	30.1465	8.63056		17.9152	-9.28468	623.688	26.1274	2.06393	34.4393	10.7315	-8.6676	406.639
hsa-let-7b MIMAT0000063	A2	25.4992	3.98319	25.3956	3.31084	0.672358	0.62748	21.5756	-2.48787	26.6828	2.97498	-5.46285	44.1043
hsa-let-7c MIMAT0000064	A3	26.6868	5.17085	26.5458	4.461	0.709849	0.611384	21.7608	-2.30268	28.0392	4.33143	-6.63411	99.3269
hsa-miR-302a MIMAT0000684	A4	19.6948	-1.82122	28.8994	6.81463	-8.63585	397.787	31.0929	7.02945	30.1055	6.39771	0.63174	0.645398
hsa-miR-302b MIMAT0000715	A5	18.5514	-2.96456	27.5984	5.51363	-8.47819	356.606	30.9235	6.86001	30.5037	6.79595	0.064058	0.95657
hsa-miR-302b MIMAT0000715	A6	18.7402	-2.7758	31.6566	9.57187	-12.3477	5212.16	31.0392	6.9757	30.2705	6.56275	0.412946	0.751088
hsa-miR-302d MIMAT0000718	A7	15.6012	-5.91478	24.8221	2.73738	-8.65216	402.31	26.7388	2.67532	27.0919	3.38416	-0.708844	1.63449
hsa-miR-302e MIMAT0005931	A8		18.484		17.9152				15.9365		16.2922
chr16_7143_66598352_ESC	A9	23.2812	1.76521	21.5512	-0.533517	2.29872	0.203243	23.9971	-0.066403	22.6998	-1.00799	0.941585	0.520661
chr1_34841_57742744_ESC	A10	7.69887	-13.8171		17.9152	-31.7324	3.56771e+09		15.9365		16.2922
chr2_24885_68184263_ESC	A11	29.9115	8.39552	33.2014	11.1166	-2.72108	6.59365	28.8547	4.79126	32.6299	8.92215	-4.13089	17.5195
chr17_8609_24601175_ESC	A12		18.484		17.9152				15.9365	31.8613	8.15354
chr7_6146_21457077_ESC	B1	27.7037	6.18772	27.3939	5.30914	0.878575	0.543904	24.0767	0.01321	29.1946	5.48679	-5.47358	44.4336
chr5_28502_33723911_ESC	B2	32.1788	10.6628	32.4902	10.4054	0.257351	0.836623	34.0299	9.96644	33.5405	9.83276	0.133678	0.911505
chr2_16208_33723531_ESC	B3	34.1958	12.6798	34.387	12.3023	0.377563	0.769737	35.5	11.4365	35.6894	11.9816	-0.54515	1.45917
chr8_20758_66996818_ESC	B4	29.8918	8.37582	35.433	13.3482	-4.97237	31.3931	27.6012	3.53776	36.9573	13.2496	-9.71179	838.57
chr12_4368_68950000_ESC	B5	29.874	8.35799	30.9968	8.91204	-0.554048	1.4682	32.524	8.46052	30.878	7.17026	1.29026	0.408876
chr2_21803_65330294_ESC	B6	32.5745	11.0585		17.9152	-6.85669	115.896	34.2681	10.2046		16.2922	-6.08761	68.0069
chr1_24686_40923188_ESC	B7	24.1749	2.65895	21.9704	-0.114393	2.77335	0.146265	26.003	1.93956	24.5301	0.822311	1.11725	0.460972
chr21_3536_55654795_ESC	B8	28.5965	7.0805	29.649	7.56425	-0.483756	1.39838	32.2157	8.15227		16.2922	-8.13995	282.077
chr8_21269_36459555_ESC	B9	8.9484	-12.5676	9.07345	-13.0113	0.443724	0.735234		15.9365		16.2922
chr3_12656_28861935_ESC	B10	33.6316	12.1156	27.4789	5.39416	6.72143	0.00947647	33.3957	9.33224	33.2848	9.57706	-0.24482	1.18494
chr12_15008_46772368_ESC	B11	34.9754	13.4594		17.9152	-4.45582	21.945	35.9401	11.8766	38.8133	15.1055	-3.22894	9.37578
chr12_4812_20035690_ESC	B12	30.9177	9.40175	31.857	9.77223	-0.37048	1.29278	34.083	10.0196	31.8141	8.10631	1.91326	0.265492
chr13_4177_28873168_ESC	C1		18.484		17.9152				15.9365		16.2922
chr20_2390_64663027_ESC	C2	29.5612	8.04517	29.881	7.79619	0.248974	0.841495	32.5139	8.45043	30.1599	6.45216	1.99827	0.2503
chr5_11455_65485438_ESC	C3		18.484		17.9152				15.9365		16.2922
chr7_10545_33603820_ESC	C4	33.138	11.622	32.0915	10.0067	1.61532	0.326392	37.8417	13.7782	35.0235	11.3157	2.46248	0.181434
chr11_2561_18944767_ESC	C5	18.5234	-2.99259	27.8388	5.75407	-8.74666	429.542	30.8544	6.79093	30.4523	6.74456	0.046375	0.968366
chr11_3742_57663521_ESC	C6		18.484		17.9152				15.9365		16.2922
chr2_12371_57698572_ESC	C7	30.9065	9.39052	30.3906	8.30587	1.08465	0.471506	34.1255	10.0621	32.465	8.75723	1.30484	0.404767
chr7_789_57723907_ESC	C8	23.1311	1.61509	23.317	1.23222	0.382868	0.766911	26.1515	2.08807	22.7484	-0.959374	3.04744	0.120956
chr4_634_62436368_ESC	C9	28.9982	7.48224	29.427	7.34223	0.140018	0.907508	31.2531	7.18963	31.5664	7.85861	-0.668983	1.58995
chr18_71_62669908_ESC	C10		18.484		17.9152				15.9365		16.2922
chr12_12656_57369549_ESC	C11	34.8992	13.3832		17.9152	-4.53206	23.1359	37.009	12.9455		16.2922	-3.34672	10.1733
chr5_20173_63824517_ESC	C12	30.9375	9.42148	30.2298	8.14504	1.27644	0.412814	34.2544	10.1909	33.318	9.61017	0.58072	0.66863
chr11_1235_63891431_ESC	D1	26.0866	4.57058	33.2542	11.1694	-6.59885	96.9283	32.561	8.49749	33.551	9.84325	-1.34575	2.54163
chr6_6471_18958081_ESC	D2	18.5138	-3.00215	26.3588	4.27401	-7.27616	155.004	28.4257	4.36222	28.7358	5.028	-0.665775	1.58642
chrX_9099_57665111_ESC	D3	24.5812	3.06521		17.9152	-14.85	29532.8		15.9365		16.2922
chr6_16513_51678150_ESC	D4		18.484		17.9152	0.568774			15.9365	35.468	11.7602
chr17_5323_47891399_ESC	D5	36.1289	14.6129	37.2556	15.1708	-0.557928	1.47215	37.4424	13.3789	38.2877	14.5799	-1.20097	2.29894
chr20_5359_9687403_ESC	D6	33.364	11.848	33.5144	11.4296	0.418364	0.748273	29.3303	5.26682	34.6625	10.9547	-5.68791	51.5504
chr6_7392_66748809_ESC	D7	34.3077	12.7917	33.1761	11.0913	1.70039	0.307704	35.3834	11.3199	36.3679	12.6601	-1.34026	2.53198
chr2_30881_65330308_NSC	D8	23.7155	2.19949	26.9873	4.9025	-2.70301	6.51157	23.6699	-0.393543	29.1664	5.45859	-5.85213	57.7653
chr21_3847_68406963_NSC	D9	23.8904	2.37441	27.9762	5.89147	-3.51706	11.4483	19.0487	-5.01474	26.1652	2.45741	-7.47215	177.559
chr18_11615_62125918_NSC	D10	24.7402	3.22421	30.835	8.75026	-5.52605	46.0795	22.1505	-1.91301	30.2648	6.55704	-8.47005	354.601
chr1_55877_66733120_NSC	D11	31.5177	10.0017	34.2081	12.1234	-2.12167	4.35198	28.4281	4.36461	34.5956	10.8878	-6.52321	91.9775
chr20_6581_34169805_NSC	D12	33.7627	12.2467	33.962	11.8772	0.369522	0.774039	37.0115	12.948	36.7987	13.0909	-0.142964	1.10417
chr4_11314_29781252_NSC	E1	27.2891	5.77309	26.0978	4.01307	1.76002	0.295243	29.0907	5.0272	27.2835	3.5757	1.4515	0.365641
chr14_4562_5396419_NSC	E2	32.8091	11.2931	32.3647	10.28	1.01312	0.495474	34.2428	10.1793	28.1544	4.44665	5.73264	0.0188064
chr6_5316_43489071_NSC	E3	32.1038	10.5878	31.0752	8.99039	1.59742	0.330467	34.3372	10.2737	32.751	9.04321	1.23047	0.42618
chr12_25653_29993923_NSC	E4	23.8799	2.36391	22.4134	0.328623	2.03529	0.243959	25.7782	1.71476	23.4295	-0.27832	1.99308	0.251202
chr19_231_63930849_NSC	E5	13.1206	-8.39536	12.2272	-9.8576	1.46224	0.362929	14.4744	-9.58906	13.571	-10.1368	0.547768	0.684078
chr19_133_65111078_NSC	E6	36.1467	14.6307		17.9152	-3.28454	9.74415	33.547	9.48358		16.2922	-6.80864	112.1
chr4_472_7925610_NSC	E7	35.7681	14.2521	35.7888	13.704	0.548087	0.683926	36.1388	12.0753	37.6455	13.9377	-1.8624	3.63613
chr8_31280_51677585_NSC	E8	31.7696	10.2536	32.5775	10.4928	-0.239114	1.18027	31.4786	7.41518	28.4995	4.79176	2.62342	0.162282
chr4_462_48776957_NSC	E9	33.4523	11.9363	35.0617	12.977	-1.04067	2.05719	34.1236	10.0601	38.0112	14.3034	-4.24327	18.9387
chr4_39818_41498247_NSC	E10	32.6455	11.1295	32.1179	10.0331	1.0964	0.467681	34.7259	10.6625	35.6425	11.9347	-1.27226	2.41539
chr5_15180_65485486_NSC	E11	24.5157	2.99971	29.0891	7.00436	-4.00465	16.0517	26.6529	2.5894	33.2205	9.51273	-6.92333	121.375
chr7_8436_24614748_NSC	E12	28.2872	6.77116	27.4862	5.40139	1.36977	0.386953	24.0551	-0.008343	29.1297	5.42191	-5.43025	43.1191
chr19_7909_21922429_NSC	F1	28.2487	6.73267	29.3494	7.26461	-0.53194	1.44587	30.8907	6.8272	30.783	7.07521	-0.248007	1.18757
chr10_18409_14569450_NSC	F2	27.7809	6.26487	27.8962	5.8114	0.453471	0.730284	31.9408	7.8773	29.6433	5.93551	1.94179	0.260293
chr4_27770_30487093_NSC	F3	31.9349	10.4189	32.6968	10.6121	-0.193208	1.1433	35.0895	11.026	35.4255	11.7178	-0.691727	1.61522
chr18_15573_68405673_NSC	F4	26.6635	5.14747	30.9086	8.82386	-3.67639	12.7851	22.3137	-1.74982	29.6279	5.92007	-7.6699	203.643
chr10_26826_9719814_NSC	F5	35.6873	14.1713	35.9135	13.8287	0.342582	0.788629	36.5969	12.5334	39.3945	15.6867	-3.15331	8.89695
chr20_7883_49492071_NSC	F6	31.5997	10.0837		17.9152	-7.83152	227.783	31.7377	7.67422		16.2922	-8.618	392.896
chr5_20298_49494386_NSC	F7	30.1561	8.64013	32.4069	10.3221	-1.68201	3.20875	28.9807	4.91719	33.4967	9.78896	-4.87177	29.2785
chr9_18994_66734912_NSC	F8	25.135	3.61903	31.1694	9.08465	-5.46562	44.1892	23.8468	-0.216706	30.2304	6.52257	-6.73928	106.838
chr11_27120_13515723_NSC	F9	34.4194	12.9034	33.2902	11.2054	1.69796	0.308221	33.1698	9.10632	34.6851	10.9773	-1.87099	3.65784
chr2_17435_36448485_NSC	F10	31.74	10.224	30.4725	8.38778	1.83623	0.280052	31.5162	7.45277	34.0309	10.3231	-2.8703	7.31216
chr12_17322_57369550_NSC	F11	32.4904	10.9744	35.2532	13.1685	-2.19405	4.57589	33.8228	9.75929	36.449	12.7412	-2.98189	7.90018
chr6_1450_49081728_NSC	F12		18.484		17.9152	0.568774			15.9365		16.2922
chr1_53440_15970343_NSC	G1	35.3918	13.8759	33.9694	11.8846	1.99124	0.251522	38.0431	13.9796	36.8053	13.0975	0.882158	0.542555
chr18_3529_45997954_NSC	G2	21.9599	0.443944	35.8685	13.7837	-13.3398	10367.6	22.0848	-1.97864	30.0835	6.37572	-8.35435	327.274
chr5_23451_9505509_NSC	G3	31.1775	9.66147	36.9438	14.8591	-5.19761	36.6975	30.5961	6.53267	37.0115	13.3038	-6.77111	109.221
chr4_21168_57751382_NSC	G4	33.7442	12.2282	34.3986	12.3138	-0.085629	1.06115	37.0515	12.9881	35.4916	11.7839	1.20421	0.434006
chr11_26271_18182572_NSC	G5	31.6464	10.1304	32.4552	10.3704	-0.240018	1.18101	33.8566	9.79309	33.645	9.93723	-0.144135	1.10507
chr2_31553_68209502_NSC	G6	32.1448	10.6288	32.145	10.0602	0.56857	0.674285	34.5511	10.4877	33.9351	10.2273	0.260315	0.834906
chr5_27934_69125923_NSC	G7	31.6102	10.0942	31.4857	9.40095	0.693215	0.618474	32.2364	8.17297	33.6794	9.97158	-1.79861	3.47884
chr9_4256_10358703_NSC	G8		18.484		17.9152	0.568774		38.0909	14.0274		16.2922	-2.2648	4.80587
chr4_6310_9678138_NSC	G9	30.7591	9.2431	31.7339	9.64915	-0.406049	1.32505	33.5817	9.51827	32.9707	9.26288	0.255397	0.837757
chr1_31996_47671142_NSC	G10		18.484		17.9152	0.568774			15.9365	34.5145	10.8068
chrX_27359_28308221_NSC	G11	22.6858	1.16981	22.8213	0.736514	0.433298	0.740567	16.9103	-7.15315	22.8898	-0.817993	-6.33516	80.7369
chr15_12145_9687131_NSC	G12	32.7064	11.1904		17.9152	-6.72487	105.776	27.6358	3.57233	33.5657	9.85788	-6.28556	78.0083
chr1_41170_33020564_NSC	H1	27.2585	5.74252	26.4488	4.36407	1.37846	0.38463	29.5678	5.50435	28.0055	4.29768	1.20667	0.433266
chr19_10215_32955867_NSC	H2	29.8651	8.34914	30.1548	8.07002	0.27912	0.824094	31.9765	7.91298	32.1131	8.40537	-0.492388	1.40677
chr2_9688_63160774_NSC	H3	35.5194	14.0034	34.1597	12.0749	1.92846	0.262709	32.8537	8.79019	37.0646	13.3568	-4.56659	23.6964
chr1_36669_66730773_NSC	H4	37.2505	15.7345	34.8972	12.8125	2.92207	0.131938	32.2124	8.1489		16.2922	-8.14332	282.737
chr7_19442_21919629_NSC	H5		18.484		17.9152	0.568774		35.1772	11.1137		16.2922	-5.17847	36.2139
chr20_4725_13529522_NSC	H6		18.484		17.9152	0.568774			15.9365		16.2922
chr1_54830_63264220_NSC	H7	23.7273	2.21132	24.6061	2.5213	-0.309976	1.23969	17.0921	-6.97136	24.7077	0.999893	-7.97125	250.949
chr9_16884_28256591_NSC	H8	35.1531	13.6371		17.9152	-4.27816	19.4024	37.7833	13.7198	38.2664	14.5587	-0.838833	1.7886
chr10_21106_21623315_NSC	H9	36.478	14.962	36.2247	14.1399	0.822085	0.565624		15.9365	38.1929	14.4851
chr6_28246_51353319_NSC	H10	36.9027	15.3867		17.9152	-2.52858	5.77002	37.5528	13.4893	37.6651	13.9573	-0.468029	1.38322
chr14_8538_56729170_NSC	H11	33.4149	11.899	33.5403	11.4556	0.443374	0.735413	36.525	12.4616	34.9788	11.2711	1.19049	0.438155
	Ncode Control	21.516	0	22.0848	0			24.0635	0	23.7078
